# Supplementary material for: Genomic epidemiology of SARS-CoV-2 during the first four waves in Mozambique
Source: PLOS Glob Public Health. 2023 Mar 6;3(3):e0001593. doi: 10.1371/journal.pgph.0001593 (PMC10021167; doi:10.1371/journal.pgph.0001593)
Supplement: S4 Table — (XLSX) [file pgph.0001593.s005.xlsx]

## Sheet: Sheet 1
	S4 Table: GISAID contributions and acknowledgements for SARS-CoV-2 genome assemblies accessed this study.
	We gratefully acknowledge the following authors from the listed originating laboratories responsible for obtaining the specimens and the submitting laboratories where genetic sequence data were generated and shared via the GISAID Initiative, on which this research is based.
	Virus name	Accession Numbers (GISAID_EPI_ISL)	Date collected	Originating laboratory	Submitting laboratory	Authors
1	hCoV-19/Mozambique/INS-K008779/2021	EPI_ISL_1132826	2021-01-30	Instituto Nacional de Saude (INS)	KRISP, KZN Research Innovation and Sequencing Platform	Ismael et al
2	hCoV-19/Mozambique/INS-K008773/2021	EPI_ISL_1132820	2021-01-10	Instituto Nacional de Saude (INS)	KRISP, KZN Research Innovation and Sequencing Platform	Ismael et al
3	hCoV-19/Mozambique/INS-K008774/2021	EPI_ISL_1132821	2021-01-10	Instituto Nacional de Saude (INS)	KRISP, KZN Research Innovation and Sequencing Platform	Ismael et al
4	hCoV-19/Mozambique/INS-K008775/2021	EPI_ISL_1132822	2021-01-10	Instituto Nacional de Saude (INS)	KRISP, KZN Research Innovation and Sequencing Platform	Ismael et al
5	hCoV-19/Mozambique/INS-K008772/2021	EPI_ISL_1132819	2021-01-28	Instituto Nacional de Saude (INS)	KRISP, KZN Research Innovation and Sequencing Platform	Ismael et al
6	hCoV-19/Mozambique/INS-K008777/2021	EPI_ISL_1132824	2021-01-30	Instituto Nacional de Saude (INS)	KRISP, KZN Research Innovation and Sequencing Platform	Ismael et al
7	hCoV-19/Mozambique/INS-K008776/2021	EPI_ISL_1132823	2021-01-08	Instituto Nacional de Saude (INS)	KRISP, KZN Research Innovation and Sequencing Platform	Ismael et al
8	hCoV-19/Mozambique/INS-K008771/2021	EPI_ISL_1132818	2021-01-14	Instituto Nacional de Saude (INS)	KRISP, KZN Research Innovation and Sequencing Platform	Ismael et al
9	hCoV-19/Mozambique/INS-K008809/2021	EPI_ISL_1132841	2021-01-16	Instituto Nacional de Saude (INS)	KRISP, KZN Research Innovation and Sequencing Platform	Ismael et al
10	hCoV-19/Mozambique/INS-K008778/2021	EPI_ISL_1132825	2021-01-30	Instituto Nacional de Saude (INS)	KRISP, KZN Research Innovation and Sequencing Platform	Ismael et al
11	hCoV-19/Mozambique/INS-K008810/2021	EPI_ISL_1132842	2021-01-16	Instituto Nacional de Saude (INS)	KRISP, KZN Research Innovation and Sequencing Platform	Ismael et al
12	hCoV-19/Mozambique/INS-K008784/2021	EPI_ISL_1132830	2021-01-13	Instituto Nacional de Saude (INS)	KRISP, KZN Research Innovation and Sequencing Platform	Ismael et al
13	hCoV-19/Mozambique/INS-K008811/2021	EPI_ISL_1132843	2021-01-22	Instituto Nacional de Saude (INS)	KRISP, KZN Research Innovation and Sequencing Platform	Ismael et al
14	hCoV-19/Mozambique/INS-K008817/2021	EPI_ISL_1132844	2021-01-05	Instituto Nacional de Saude (INS)	KRISP, KZN Research Innovation and Sequencing Platform	Ismael et al
15	hCoV-19/Mozambique/INS-K008803/2021	EPI_ISL_1132839	2021-01-09	Instituto Nacional de Saude (INS)	KRISP, KZN Research Innovation and Sequencing Platform	Ismael et al
16	hCoV-19/Mozambique/INS-K008805/2021	EPI_ISL_1132840	2021-01-16	Instituto Nacional de Saude (INS)	KRISP, KZN Research Innovation and Sequencing Platform	Ismael et al
17	hCoV-19/Mozambique/INS-K008781/2021	EPI_ISL_1132828	2021-01-30	Instituto Nacional de Saude (INS)	KRISP, KZN Research Innovation and Sequencing Platform	Ismael et al
18	hCoV-19/Mozambique/INS-K008799/2021	EPI_ISL_1132838	2021-01-18	Instituto Nacional de Saude (INS)	KRISP, KZN Research Innovation and Sequencing Platform	Ismael et al
19	hCoV-19/Mozambique/INS-K008790/2021	EPI_ISL_1132833	2021-01-18	Instituto Nacional de Saude (INS)	KRISP, KZN Research Innovation and Sequencing Platform	Ismael et al
20	hCoV-19/Mozambique/INS-K008794/2021	EPI_ISL_1132835	2021-01-10	Instituto Nacional de Saude (INS)	KRISP, KZN Research Innovation and Sequencing Platform	Ismael et al
21	hCoV-19/Mozambique/INS-K008785/2021	EPI_ISL_1132831	2021-01-18	Instituto Nacional de Saude (INS)	KRISP, KZN Research Innovation and Sequencing Platform	Ismael et al
22	hCoV-19/Mozambique/INS-K008791/2021	EPI_ISL_1132834	2021-01-10	Instituto Nacional de Saude (INS)	KRISP, KZN Research Innovation and Sequencing Platform	Ismael et al
23	hCoV-19/Mozambique/INS-K008788/2021	EPI_ISL_1132832	2021-01-26	Instituto Nacional de Saude (INS)	KRISP, KZN Research Innovation and Sequencing Platform	Ismael et al
24	hCoV-19/Mozambique/INS-K008797/2021	EPI_ISL_1132836	2021-01-22	Instituto Nacional de Saude (INS)	KRISP, KZN Research Innovation and Sequencing Platform	Ismael et al
25	hCoV-19/Mozambique/INS-K008780/2021	EPI_ISL_1132827	2021-01-30	Instituto Nacional de Saude (INS)	KRISP, KZN Research Innovation and Sequencing Platform	Ismael et al
26	hCoV-19/Mozambique/INS-K008798/2021	EPI_ISL_1132837	2021-01-22	Instituto Nacional de Saude (INS)	KRISP, KZN Research Innovation and Sequencing Platform	Ismael et al
27	hCoV-19/Mozambique/INS-K008783/2021	EPI_ISL_1132829	2021-01-13	Instituto Nacional de Saude (INS)	KRISP, KZN Research Innovation and Sequencing Platform	Ismael et al
28	hCoV-19/Mozambique/CERI-KRISP-K027170/2021	EPI_ISL_8799659	2021-07-12	Instituto Nacional de Saude (INS)	CERI, Centre for Epidemic Response and Innvoation, Stellenbosch University and KRISP, KZN Research Innovation and Sequencing Platform, UKZN.	Ismael et al
29	hCoV-19/Mozambique/CERI-KRISP-K027158/2021	EPI_ISL_8799653	2021-10-07	Instituto Nacional de Saude (INS)	CERI, Centre for Epidemic Response and Innvoation, Stellenbosch University and KRISP, KZN Research Innovation and Sequencing Platform, UKZN.	Ismael et al
30	hCoV-19/Mozambique/CERI-KRISP-K027151/2021	EPI_ISL_8799651	2021-07-08	Instituto Nacional de Saude (INS)	CERI, Centre for Epidemic Response and Innvoation, Stellenbosch University and KRISP, KZN Research Innovation and Sequencing Platform, UKZN.	Ismael et al
31	hCoV-19/Mozambique/CERI-KRISP-K027142/2021	EPI_ISL_8799649	2021-07-27	Instituto Nacional de Saude (INS)	CERI, Centre for Epidemic Response and Innvoation, Stellenbosch University and KRISP, KZN Research Innovation and Sequencing Platform, UKZN.	Ismael et al
32	hCoV-19/Mozambique/CERI-KRISP-K027136/2021	EPI_ISL_8799643	2021-07-27	Instituto Nacional de Saude (INS)	CERI, Centre for Epidemic Response and Innvoation, Stellenbosch University and KRISP, KZN Research Innovation and Sequencing Platform, UKZN.	Ismael et al
33	hCoV-19/Mozambique/CERI-KRISP-K027214/2021	EPI_ISL_8799682	2021-07-12	Instituto Nacional de Saude (INS)	CERI, Centre for Epidemic Response and Innvoation, Stellenbosch University and KRISP, KZN Research Innovation and Sequencing Platform, UKZN.	Ismael et al
34	hCoV-19/Mozambique/CERI-KRISP-K027137/2021	EPI_ISL_8799644	2021-07-27	Instituto Nacional de Saude (INS)	CERI, Centre for Epidemic Response and Innvoation, Stellenbosch University and KRISP, KZN Research Innovation and Sequencing Platform, UKZN.	Ismael et al
35	hCoV-19/Mozambique/CERI-KRISP-K027205/2021	EPI_ISL_8799680	2021-07-14	Instituto Nacional de Saude (INS)	CERI, Centre for Epidemic Response and Innvoation, Stellenbosch University and KRISP, KZN Research Innovation and Sequencing Platform, UKZN.	Ismael et al
36	hCoV-19/Mozambique/CERI-KRISP-K027140/2021	EPI_ISL_8799647	2021-07-27	Instituto Nacional de Saude (INS)	CERI, Centre for Epidemic Response and Innvoation, Stellenbosch University and KRISP, KZN Research Innovation and Sequencing Platform, UKZN.	Ismael et al
37	hCoV-19/Mozambique/CERI-KRISP-K027173/2021	EPI_ISL_8799662	2021-07-13	Instituto Nacional de Saude (INS)	CERI, Centre for Epidemic Response and Innvoation, Stellenbosch University and KRISP, KZN Research Innovation and Sequencing Platform, UKZN.	Ismael et al
38	hCoV-19/Mozambique/CERI-KRISP-K027216/2021	EPI_ISL_8799683	2021-07-12	Instituto Nacional de Saude (INS)	CERI, Centre for Epidemic Response and Innvoation, Stellenbosch University and KRISP, KZN Research Innovation and Sequencing Platform, UKZN.	Ismael et al
39	hCoV-19/Mozambique/CERI-KRISP-K027186/2021	EPI_ISL_8799674	2021-07-30	Instituto Nacional de Saude (INS)	CERI, Centre for Epidemic Response and Innvoation, Stellenbosch University and KRISP, KZN Research Innovation and Sequencing Platform, UKZN.	Ismael et al
40	hCoV-19/Mozambique/CERI-KRISP-K027171/2021	EPI_ISL_8799660	2021-07-12	Instituto Nacional de Saude (INS)	CERI, Centre for Epidemic Response and Innvoation, Stellenbosch University and KRISP, KZN Research Innovation and Sequencing Platform, UKZN.	Ismael et al
41	hCoV-19/Mozambique/CERI-KRISP-K027160/2021	EPI_ISL_8799655	2021-07-20	Instituto Nacional de Saude (INS)	CERI, Centre for Epidemic Response and Innvoation, Stellenbosch University and KRISP, KZN Research Innovation and Sequencing Platform, UKZN.	Ismael et al
42	hCoV-19/Mozambique/CERI-KRISP-K027174/2021	EPI_ISL_8799663	2021-07-16	Instituto Nacional de Saude (INS)	CERI, Centre for Epidemic Response and Innvoation, Stellenbosch University and KRISP, KZN Research Innovation and Sequencing Platform, UKZN.	Ismael et al
43	hCoV-19/Mozambique/CERI-KRISP-K027200/2021	EPI_ISL_8799679	2021-07-14	Instituto Nacional de Saude (INS)	CERI, Centre for Epidemic Response and Innvoation, Stellenbosch University and KRISP, KZN Research Innovation and Sequencing Platform, UKZN.	Ismael et al
44	hCoV-19/Mozambique/CERI-KRISP-K027180/2021	EPI_ISL_8799669	2021-07-23	Instituto Nacional de Saude (INS)	CERI, Centre for Epidemic Response and Innvoation, Stellenbosch University and KRISP, KZN Research Innovation and Sequencing Platform, UKZN.	Ismael et al
45	hCoV-19/Mozambique/CERI-KRISP-K027184/2021	EPI_ISL_8799672	2021-07-26	Instituto Nacional de Saude (INS)	CERI, Centre for Epidemic Response and Innvoation, Stellenbosch University and KRISP, KZN Research Innovation and Sequencing Platform, UKZN.	Ismael et al
46	hCoV-19/Mozambique/CERI-KRISP-K027172/2021	EPI_ISL_8799661	2021-07-13	Instituto Nacional de Saude (INS)	CERI, Centre for Epidemic Response and Innvoation, Stellenbosch University and KRISP, KZN Research Innovation and Sequencing Platform, UKZN.	Ismael et al
47	hCoV-19/Mozambique/CERI-KRISP-K027167/2021	EPI_ISL_8799656	2021-07-01	Instituto Nacional de Saude (INS)	CERI, Centre for Epidemic Response and Innvoation, Stellenbosch University and KRISP, KZN Research Innovation and Sequencing Platform, UKZN.	Ismael et al
48	hCoV-19/Mozambique/CERI-KRISP-K027139/2021	EPI_ISL_8799646	2021-07-27	Instituto Nacional de Saude (INS)	CERI, Centre for Epidemic Response and Innvoation, Stellenbosch University and KRISP, KZN Research Innovation and Sequencing Platform, UKZN.	Ismael et al
49	hCoV-19/Mozambique/CERI-KRISP-K027135/2021	EPI_ISL_8799642	2021-07-26	Instituto Nacional de Saude (INS)	CERI, Centre for Epidemic Response and Innvoation, Stellenbosch University and KRISP, KZN Research Innovation and Sequencing Platform, UKZN.	Ismael et al
50	hCoV-19/Mozambique/CERI-KRISP-K027179/2021	EPI_ISL_8799668	2021-07-23	Instituto Nacional de Saude (INS)	CERI, Centre for Epidemic Response and Innvoation, Stellenbosch University and KRISP, KZN Research Innovation and Sequencing Platform, UKZN.	Ismael et al
51	hCoV-19/Mozambique/CERI-KRISP-K027141/2021	EPI_ISL_8799648	2021-07-27	Instituto Nacional de Saude (INS)	CERI, Centre for Epidemic Response and Innvoation, Stellenbosch University and KRISP, KZN Research Innovation and Sequencing Platform, UKZN.	Ismael et al
52	hCoV-19/Mozambique/CERI-KRISP-K027143/2021	EPI_ISL_8799650	2021-07-12	Instituto Nacional de Saude (INS)	CERI, Centre for Epidemic Response and Innvoation, Stellenbosch University and KRISP, KZN Research Innovation and Sequencing Platform, UKZN.	Ismael et al
53	hCoV-19/Mozambique/CERI-KRISP-K027176/2021	EPI_ISL_8799665	2021-07-15	Instituto Nacional de Saude (INS)	CERI, Centre for Epidemic Response and Innvoation, Stellenbosch University and KRISP, KZN Research Innovation and Sequencing Platform, UKZN.	Ismael et al
54	hCoV-19/Mozambique/CERI-KRISP-K027206/2021	EPI_ISL_8799681	2021-07-14	Instituto Nacional de Saude (INS)	CERI, Centre for Epidemic Response and Innvoation, Stellenbosch University and KRISP, KZN Research Innovation and Sequencing Platform, UKZN.	Ismael et al
55	hCoV-19/Mozambique/CERI-KRISP-K027177/2021	EPI_ISL_8799666	2021-07-19	Instituto Nacional de Saude (INS)	CERI, Centre for Epidemic Response and Innvoation, Stellenbosch University and KRISP, KZN Research Innovation and Sequencing Platform, UKZN.	Ismael et al
56	hCoV-19/Mozambique/CERI-KRISP-K027195/2021	EPI_ISL_8799678	2021-07-14	Instituto Nacional de Saude (INS)	CERI, Centre for Epidemic Response and Innvoation, Stellenbosch University and KRISP, KZN Research Innovation and Sequencing Platform, UKZN.	Ismael et al
57	hCoV-19/Mozambique/CERI-KRISP-K027175/2021	EPI_ISL_8799664	2021-07-13	Instituto Nacional de Saude (INS)	CERI, Centre for Epidemic Response and Innvoation, Stellenbosch University and KRISP, KZN Research Innovation and Sequencing Platform, UKZN.	Ismael et al
58	hCoV-19/Mozambique/CERI-KRISP-K027191/2021	EPI_ISL_8799676	2021-07-14	Instituto Nacional de Saude (INS)	CERI, Centre for Epidemic Response and Innvoation, Stellenbosch University and KRISP, KZN Research Innovation and Sequencing Platform, UKZN.	Ismael et al
59	hCoV-19/Mozambique/CERI-KRISP-K027178/2021	EPI_ISL_8799667	2021-07-21	Instituto Nacional de Saude (INS)	CERI, Centre for Epidemic Response and Innvoation, Stellenbosch University and KRISP, KZN Research Innovation and Sequencing Platform, UKZN.	Ismael et al
60	hCoV-19/Mozambique/CERI-KRISP-K027159/2021	EPI_ISL_8799654	2021-08-07	Instituto Nacional de Saude (INS)	CERI, Centre for Epidemic Response and Innvoation, Stellenbosch University and KRISP, KZN Research Innovation and Sequencing Platform, UKZN.	Ismael et al
61	hCoV-19/Mozambique/CERI-KRISP-K027183/2021	EPI_ISL_8799671	2021-07-27	Instituto Nacional de Saude (INS)	CERI, Centre for Epidemic Response and Innvoation, Stellenbosch University and KRISP, KZN Research Innovation and Sequencing Platform, UKZN.	Ismael et al
62	hCoV-19/Mozambique/CERI-KRISP-K027185/2021	EPI_ISL_8799673	2021-07-27	Instituto Nacional de Saude (INS)	CERI, Centre for Epidemic Response and Innvoation, Stellenbosch University and KRISP, KZN Research Innovation and Sequencing Platform, UKZN.	Ismael et al
63	hCoV-19/Mozambique/CERI-KRISP-K027182/2021	EPI_ISL_8799670	2021-07-20	Instituto Nacional de Saude (INS)	CERI, Centre for Epidemic Response and Innvoation, Stellenbosch University and KRISP, KZN Research Innovation and Sequencing Platform, UKZN.	Ismael et al
64	hCoV-19/Mozambique/CERI-KRISP-K027155/2021	EPI_ISL_8799652	2021-07-20	Instituto Nacional de Saude (INS)	CERI, Centre for Epidemic Response and Innvoation, Stellenbosch University and KRISP, KZN Research Innovation and Sequencing Platform, UKZN.	Ismael et al
65	hCoV-19/Mozambique/CERI-KRISP-K027168/2021	EPI_ISL_8799657	2021-07-05	Instituto Nacional de Saude (INS)	CERI, Centre for Epidemic Response and Innvoation, Stellenbosch University and KRISP, KZN Research Innovation and Sequencing Platform, UKZN.	Ismael et al
66	hCoV-19/Mozambique/CERI-KRISP-K027138/2021	EPI_ISL_8799645	2021-07-27	Instituto Nacional de Saude (INS)	CERI, Centre for Epidemic Response and Innvoation, Stellenbosch University and KRISP, KZN Research Innovation and Sequencing Platform, UKZN.	Ismael et al
67	hCoV-19/Mozambique/CERI-KRISP-K027192/2021	EPI_ISL_8799677	2021-07-14	Instituto Nacional de Saude (INS)	CERI, Centre for Epidemic Response and Innvoation, Stellenbosch University and KRISP, KZN Research Innovation and Sequencing Platform, UKZN.	Ismael et al
68	hCoV-19/Mozambique/CERI-KRISP-K027187/2021	EPI_ISL_8799675	2021-07-13	Instituto Nacional de Saude (INS)	CERI, Centre for Epidemic Response and Innvoation, Stellenbosch University and KRISP, KZN Research Innovation and Sequencing Platform, UKZN.	Ismael et al
69	hCoV-19/Mozambique/CERI-KRISP-K027169/2021	EPI_ISL_8799658	2021-07-07	Instituto Nacional de Saude (INS)	CERI, Centre for Epidemic Response and Innvoation, Stellenbosch University and KRISP, KZN Research Innovation and Sequencing Platform, UKZN.	Ismael et al
70	hCoV-19/Mozambique/N24969/2021	EPI_ISL_9452283	2021-12-03	Instituto Nacional de Saude (INS)	National Institute for Communicable Diseases of the National Health Laboratory Service	Viegas et al
71	hCoV-19/Mozambique/N24971/2021	EPI_ISL_9452284	2021-12-03	Instituto Nacional de Saude (INS)	National Institute for Communicable Diseases of the National Health Laboratory Service	Viegas et al
72	hCoV-19/Mozambique/N24976/2021	EPI_ISL_9452289	2021-12-03	Instituto Nacional de Saude (INS)	National Institute for Communicable Diseases of the National Health Laboratory Service	Viegas et al
73	hCoV-19/Mozambique/N24975/2021	EPI_ISL_9452288	2021-12-02	Instituto Nacional de Saude (INS)	National Institute for Communicable Diseases of the National Health Laboratory Service	Viegas et al
74	hCoV-19/Mozambique/CERI-KRISP-K033890/2021	EPI_ISL_8578324	2021-12-11	Instituto Nacional de Saude (INS)	CERI, Centre for Epidemic Response and Innvoation, Stellenbosch University and KRISP, KZN Research Innovation and Sequencing Platform, UKZN.	Ismael et al
75	hCoV-19/Mozambique/CERI-KRISP-K033848/2021	EPI_ISL_8578328	2021-12-08	Instituto Nacional de Saude (INS)	CERI, Centre for Epidemic Response and Innvoation, Stellenbosch University and KRISP, KZN Research Innovation and Sequencing Platform, UKZN.	Ismael et al
76	hCoV-19/Mozambique/CERI-KRISP-K033895/2021	EPI_ISL_8578338	2021-12-12	Instituto Nacional de Saude (INS)	CERI, Centre for Epidemic Response and Innvoation, Stellenbosch University and KRISP, KZN Research Innovation and Sequencing Platform, UKZN.	Ismael et al
77	hCoV-19/Mozambique/CERI-KRISP-K033894/2021	EPI_ISL_8578316	2021-12-12	Instituto Nacional de Saude (INS)	CERI, Centre for Epidemic Response and Innvoation, Stellenbosch University and KRISP, KZN Research Innovation and Sequencing Platform, UKZN.	Ismael et al
78	hCoV-19/Mozambique/CERI-KRISP-K033863/2021	EPI_ISL_8578319	2021-12-06	Instituto Nacional de Saude (INS)	CERI, Centre for Epidemic Response and Innvoation, Stellenbosch University and KRISP, KZN Research Innovation and Sequencing Platform, UKZN.	Ismael et al
79	hCoV-19/Mozambique/CERI-KRISP-K033893/2021	EPI_ISL_8578315	2021-12-12	Instituto Nacional de Saude (INS)	CERI, Centre for Epidemic Response and Innvoation, Stellenbosch University and KRISP, KZN Research Innovation and Sequencing Platform, UKZN.	Ismael et al
80	hCoV-19/Mozambique/N24972/2021	EPI_ISL_9452285	2021-12-03	Instituto Nacional de Saude (INS)	National Institute for Communicable Diseases of the National Health Laboratory Service	Viegas et al
81	hCoV-19/Mozambique/N24977/2021	EPI_ISL_9452290	2021-12-03	Instituto Nacional de Saude (INS)	National Institute for Communicable Diseases of the National Health Laboratory Service	Viegas et al
82	hCoV-19/Mozambique/N24974/2021	EPI_ISL_9452287	2021-12-02	Instituto Nacional de Saude (INS)	National Institute for Communicable Diseases of the National Health Laboratory Service	Viegas et al
83	hCoV-19/Mozambique/N24973/2021	EPI_ISL_9452286	2021-12-02	Instituto Nacional de Saude (INS)	National Institute for Communicable Diseases of the National Health Laboratory Service	Viegas et al
84	hCoV-19/Mozambique/CERI-KRISP-K035343/2021	EPI_ISL_9259276	2021-12-21	Instituto Nacional de Saude (INS)	CERI, Centre for Epidemic Response and Innovation, Stellenbosch University and KRISP, KZN Research Innovation and Sequencing Platform, UKZN.	Ismael et al
85	hCoV-19/Mozambique/CERI-KRISP-K035327/2021	EPI_ISL_9259273	2021-12-23	Instituto Nacional de Saude (INS)	CERI, Centre for Epidemic Response and Innovation, Stellenbosch University and KRISP, KZN Research Innovation and Sequencing Platform, UKZN.	Ismael et al
86	hCoV-19/Mozambique/CERI-KRISP-K035336/2021	EPI_ISL_9259275	2021-12-27	Instituto Nacional de Saude (INS)	CERI, Centre for Epidemic Response and Innovation, Stellenbosch University and KRISP, KZN Research Innovation and Sequencing Platform, UKZN.	Ismael et al
87	hCoV-19/Mozambique/CERI-KRISP-K035334/2021	EPI_ISL_9259274	2021-12-27	Instituto Nacional de Saude (INS)	CERI, Centre for Epidemic Response and Innovation, Stellenbosch University and KRISP, KZN Research Innovation and Sequencing Platform, UKZN.	Ismael et al
88	hCoV-19/Mozambique/CERI-KRISP-K027975/2021	EPI_ISL_7417221	2021-09-01	Instituto Nacional de Saude (INS)	CERI, Centre for Epidemic Response and Innvoation, Stellenbosch University and KRISP, KZN Research Innovation and Sequencing Platform, UKZN.	Ismael et al
89	hCoV-19/Mozambique/CERI-KRISP-K027976/2021	EPI_ISL_7417469	2021-09-01	Instituto Nacional de Saude (INS)	CERI, Centre for Epidemic Response and Innvoation, Stellenbosch University and KRISP, KZN Research Innovation and Sequencing Platform, UKZN.	Ismael et al
90	hCoV-19/Mozambique/CERI-KRISP-K032744/2021	EPI_ISL_7715448	2021-11-30	Instituto Nacional de Saude (INS)	CERI, Centre for Epidemic Response and Innvoation, Stellenbosch University and KRISP, KZN Research Innovation and Sequencing Platform, UKZN.	Ismael et al
91	hCoV-19/Mozambique/CERI-KRISP-K032742/2021	EPI_ISL_7715446	2021-11-29	Instituto Nacional de Saude (INS)	CERI, Centre for Epidemic Response and Innvoation, Stellenbosch University and KRISP, KZN Research Innovation and Sequencing Platform, UKZN.	Ismael et al
92	hCoV-19/Mozambique/CERI-KRISP-K032761/2021	EPI_ISL_7715459	2021-11-04	Instituto Nacional de Saude (INS)	CERI, Centre for Epidemic Response and Innvoation, Stellenbosch University and KRISP, KZN Research Innovation and Sequencing Platform, UKZN.	Ismael et al
93	hCoV-19/Mozambique/CERI-KRISP-K032745/2021	EPI_ISL_7715449	2021-11-30	Instituto Nacional de Saude (INS)	CERI, Centre for Epidemic Response and Innvoation, Stellenbosch University and KRISP, KZN Research Innovation and Sequencing Platform, UKZN.	Ismael et al
94	hCoV-19/Mozambique/CERI-KRISP-K032768/2021	EPI_ISL_7715464	2021-11-30	Instituto Nacional de Saude (INS)	CERI, Centre for Epidemic Response and Innvoation, Stellenbosch University and KRISP, KZN Research Innovation and Sequencing Platform, UKZN.	Ismael et al
95	hCoV-19/Mozambique/CERI-KRISP-K032749/2021	EPI_ISL_7715452	2021-11-30	Instituto Nacional de Saude (INS)	CERI, Centre for Epidemic Response and Innvoation, Stellenbosch University and KRISP, KZN Research Innovation and Sequencing Platform, UKZN.	Ismael et al
96	hCoV-19/Mozambique/CERI-KRISP-K032763/2021	EPI_ISL_7715460	2021-11-30	Instituto Nacional de Saude (INS)	CERI, Centre for Epidemic Response and Innvoation, Stellenbosch University and KRISP, KZN Research Innovation and Sequencing Platform, UKZN.	Ismael et al
97	hCoV-19/Mozambique/CERI-KRISP-K032755/2021	EPI_ISL_7715456	2021-11-26	Instituto Nacional de Saude (INS)	CERI, Centre for Epidemic Response and Innvoation, Stellenbosch University and KRISP, KZN Research Innovation and Sequencing Platform, UKZN.	Ismael et al
98	hCoV-19/Mozambique/CERI-KRISP-K032760/2021	EPI_ISL_7715458	2021-11-27	Instituto Nacional de Saude (INS)	CERI, Centre for Epidemic Response and Innvoation, Stellenbosch University and KRISP, KZN Research Innovation and Sequencing Platform, UKZN.	Ismael et al
99	hCoV-19/Mozambique/CERI-KRISP-K032751/2021	EPI_ISL_7715453	2021-11-30	Instituto Nacional de Saude (INS)	CERI, Centre for Epidemic Response and Innvoation, Stellenbosch University and KRISP, KZN Research Innovation and Sequencing Platform, UKZN.	Ismael et al
100	hCoV-19/Mozambique/CERI-KRISP-K032746/2021	EPI_ISL_7715450	2021-11-30	Instituto Nacional de Saude (INS)	CERI, Centre for Epidemic Response and Innvoation, Stellenbosch University and KRISP, KZN Research Innovation and Sequencing Platform, UKZN.	Ismael et al
101	hCoV-19/Mozambique/CERI-KRISP-K032752/2021	EPI_ISL_7715454	2021-11-27	Instituto Nacional de Saude (INS)	CERI, Centre for Epidemic Response and Innvoation, Stellenbosch University and KRISP, KZN Research Innovation and Sequencing Platform, UKZN.	Ismael et al
102	hCoV-19/Mozambique/CERI-KRISP-K032765/2021	EPI_ISL_7715461	2021-11-30	Instituto Nacional de Saude (INS)	CERI, Centre for Epidemic Response and Innvoation, Stellenbosch University and KRISP, KZN Research Innovation and Sequencing Platform, UKZN.	Ismael et al
103	hCoV-19/Mozambique/CERI-KRISP-K032754/2021	EPI_ISL_7715455	2021-11-26	Instituto Nacional de Saude (INS)	CERI, Centre for Epidemic Response and Innvoation, Stellenbosch University and KRISP, KZN Research Innovation and Sequencing Platform, UKZN.	Ismael et al
104	hCoV-19/Mozambique/CERI-KRISP-K032743/2021	EPI_ISL_7715447	2021-11-29	Instituto Nacional de Saude (INS)	CERI, Centre for Epidemic Response and Innvoation, Stellenbosch University and KRISP, KZN Research Innovation and Sequencing Platform, UKZN.	Ismael et al
105	hCoV-19/Mozambique/CERI-KRISP-K027538/2021	EPI_ISL_9084392	2021-08-08	Instituto Nacional de Saude (INS)	CERI, Centre for Epidemic Response and Innvoation, Stellenbosch University and KRISP, KZN Research Innovation and Sequencing Platform, UKZN.	Ismael et al
106	hCoV-19/Mozambique/CERI-KRISP-K027542/2021	EPI_ISL_9084395	2021-09-08	Instituto Nacional de Saude (INS)	CERI, Centre for Epidemic Response and Innvoation, Stellenbosch University and KRISP, KZN Research Innovation and Sequencing Platform, UKZN.	Ismael et al
107	hCoV-19/Mozambique/CERI-KRISP-K027553/2021	EPI_ISL_9084400	2021-08-11	Instituto Nacional de Saude (INS)	CERI, Centre for Epidemic Response and Innvoation, Stellenbosch University and KRISP, KZN Research Innovation and Sequencing Platform, UKZN.	Ismael et al
108	hCoV-19/Mozambique/CERI-KRISP-K027540/2021	EPI_ISL_9084393	2021-09-08	Instituto Nacional de Saude (INS)	CERI, Centre for Epidemic Response and Innvoation, Stellenbosch University and KRISP, KZN Research Innovation and Sequencing Platform, UKZN.	Ismael et al
109	hCoV-19/Mozambique/CERI-KRISP-K027543/2021	EPI_ISL_9084396	2021-09-09	Instituto Nacional de Saude (INS)	CERI, Centre for Epidemic Response and Innvoation, Stellenbosch University and KRISP, KZN Research Innovation and Sequencing Platform, UKZN.	Ismael et al
110	hCoV-19/Mozambique/CERI-KRISP-K027546/2021	EPI_ISL_9084399	2021-07-20	Instituto Nacional de Saude (INS)	CERI, Centre for Epidemic Response and Innvoation, Stellenbosch University and KRISP, KZN Research Innovation and Sequencing Platform, UKZN.	Ismael et al
111	hCoV-19/Mozambique/CERI-KRISP-K027545/2021	EPI_ISL_9084398	2021-09-09	Instituto Nacional de Saude (INS)	CERI, Centre for Epidemic Response and Innvoation, Stellenbosch University and KRISP, KZN Research Innovation and Sequencing Platform, UKZN.	Ismael et al
112	hCoV-19/Mozambique/CERI-KRISP-K027544/2021	EPI_ISL_9084397	2021-09-08	Instituto Nacional de Saude (INS)	CERI, Centre for Epidemic Response and Innvoation, Stellenbosch University and KRISP, KZN Research Innovation and Sequencing Platform, UKZN.	Ismael et al
113	hCoV-19/Mozambique/CERI-KRISP-K027532/2021	EPI_ISL_9084390	2021-08-07	Instituto Nacional de Saude (INS)	CERI, Centre for Epidemic Response and Innvoation, Stellenbosch University and KRISP, KZN Research Innovation and Sequencing Platform, UKZN.	Ismael et al
114	hCoV-19/Mozambique/CERI-KRISP-K027541/2021	EPI_ISL_9084394	2021-09-08	Instituto Nacional de Saude (INS)	CERI, Centre for Epidemic Response and Innvoation, Stellenbosch University and KRISP, KZN Research Innovation and Sequencing Platform, UKZN.	Ismael et al
115	hCoV-19/Mozambique/CERI-KRISP-K027537/2021	EPI_ISL_9084391	2021-08-11	Instituto Nacional de Saude (INS)	CERI, Centre for Epidemic Response and Innvoation, Stellenbosch University and KRISP, KZN Research Innovation and Sequencing Platform, UKZN.	Ismael et al
116	hCoV-19/Mozambique/CERI-KRISP-K027528/2021	EPI_ISL_9084388	2021-08-04	Instituto Nacional de Saude (INS)	CERI, Centre for Epidemic Response and Innvoation, Stellenbosch University and KRISP, KZN Research Innovation and Sequencing Platform, UKZN.	Ismael et al
117	hCoV-19/Mozambique/CERI-KRISP-K027529/2021	EPI_ISL_9084389	2021-08-02	Instituto Nacional de Saude (INS)	CERI, Centre for Epidemic Response and Innvoation, Stellenbosch University and KRISP, KZN Research Innovation and Sequencing Platform, UKZN.	Ismael et al
118	hCoV-19/Mozambique/MZ-L-IBV-97025276/2021	EPI_ISL_2442084	2021-02-01	CISM & ISGlobal, Institut de Salut Global de Barcelona	Instituto de Biomedicina de Valencia - CSIC	Mayor et al
119	hCoV-19/Mozambique/MZ-L-IBV-97025278/2021	EPI_ISL_2442085	2021-03-03	CISM & ISGlobal, Institut de Salut Global de Barcelona	Instituto de Biomedicina de Valencia - CSIC	Mayor et al
120	hCoV-19/Mozambique/MZ-L-IBV-97025280/2021	EPI_ISL_2442086	2021-03-03	CISM & ISGlobal, Institut de Salut Global de Barcelona	Instituto de Biomedicina de Valencia - CSIC	Mayor et al
121	hCoV-19/Mozambique/MZ-L-IBV-97025285/2021	EPI_ISL_2442088	2021-02-01	CISM & ISGlobal, Institut de Salut Global de Barcelona	Instituto de Biomedicina de Valencia - CSIC	Mayor et al
122	hCoV-19/Mozambique/MZ-L-IBV-97025290/2021	EPI_ISL_2442089	2021-02-01	CISM & ISGlobal, Institut de Salut Global de Barcelona	Instituto de Biomedicina de Valencia - CSIC	Mayor et al
123	hCoV-19/Mozambique/MZ-L-IBV-97025296/2021	EPI_ISL_2442090	2021-02-20	CISM & ISGlobal, Institut de Salut Global de Barcelona	Instituto de Biomedicina de Valencia - CSIC	Mayor et al
124	hCoV-19/Mozambique/MZ-L-IBV-97025299/2021	EPI_ISL_2442091	2021-03-04	CISM & ISGlobal, Institut de Salut Global de Barcelona	Instituto de Biomedicina de Valencia - CSIC	Mayor et al
125	hCoV-19/Mozambique/MZ-L-IBV-97025302/2021	EPI_ISL_2442092	2021-02-20	CISM & ISGlobal, Institut de Salut Global de Barcelona	Instituto de Biomedicina de Valencia - CSIC	Mayor et al
126	hCoV-19/Mozambique/MZ-L-IBV-97025308/2021	EPI_ISL_2442096	2021-02-12	CISM & ISGlobal, Institut de Salut Global de Barcelona	Instituto de Biomedicina de Valencia - CSIC	Mayor et al
127	hCoV-19/Mozambique/MZ-L-IBV-97025309/2021	EPI_ISL_2442097	2021-02-17	CISM & ISGlobal, Institut de Salut Global de Barcelona	Instituto de Biomedicina de Valencia - CSIC	Mayor et al
128	hCoV-19/Mozambique/MZ-L-IBV-97025310/2021	EPI_ISL_2442098	2021-02-17	CISM & ISGlobal, Institut de Salut Global de Barcelona	Instituto de Biomedicina de Valencia - CSIC	Mayor et al
129	hCoV-19/Mozambique/MZ-L-IBV-97025311/2021	EPI_ISL_2442099	2021-02-12	CISM & ISGlobal, Institut de Salut Global de Barcelona	Instituto de Biomedicina de Valencia - CSIC	Mayor et al
130	hCoV-19/Mozambique/MZ-L-IBV-97025315/2021	EPI_ISL_2442100	2021-02-12	CISM & ISGlobal, Institut de Salut Global de Barcelona	Instituto de Biomedicina de Valencia - CSIC	Mayor et al
131	hCoV-19/Mozambique/MZ-L-IBV-97025321/2021	EPI_ISL_2442101	2021-02-12	CISM & ISGlobal, Institut de Salut Global de Barcelona	Instituto de Biomedicina de Valencia - CSIC	Mayor et al
132	hCoV-19/Mozambique/MZ-L-IBV-97025325/2021	EPI_ISL_2442102	2021-02-12	CISM & ISGlobal, Institut de Salut Global de Barcelona	Instituto de Biomedicina de Valencia - CSIC	Mayor et al
133	hCoV-19/Mozambique/MZ-L-IBV-97025326/2021	EPI_ISL_2442103	2021-02-18	CISM & ISGlobal, Institut de Salut Global de Barcelona	Instituto de Biomedicina de Valencia - CSIC	Mayor et al
134	hCoV-19/Mozambique/MZ-L-IBV-97025327/2021	EPI_ISL_2442104	2021-02-24	CISM & ISGlobal, Institut de Salut Global de Barcelona	Instituto de Biomedicina de Valencia - CSIC	Mayor et al
135	hCoV-19/Mozambique/MZ-L-IBV-97025328/2021	EPI_ISL_2442105	2021-02-12	CISM & ISGlobal, Institut de Salut Global de Barcelona	Instituto de Biomedicina de Valencia - CSIC	Mayor et al
136	hCoV-19/Mozambique/MZ-L-IBV-97025340/2021	EPI_ISL_2442106	2021-02-01	CISM & ISGlobal, Institut de Salut Global de Barcelona	Instituto de Biomedicina de Valencia - CSIC	Mayor et al
137	hCoV-19/Mozambique/MZ-L-IBV-97025342/2021	EPI_ISL_2442107	2021-02-09	CISM & ISGlobal, Institut de Salut Global de Barcelona	Instituto de Biomedicina de Valencia - CSIC	Mayor et al
138	hCoV-19/Mozambique/MZ-L-IBV-97025343/2021	EPI_ISL_2442108	2021-02-02	CISM & ISGlobal, Institut de Salut Global de Barcelona	Instituto de Biomedicina de Valencia - CSIC	Mayor et al
139	hCoV-19/Mozambique/MZ-L-IBV-97025345/2021	EPI_ISL_2442109	2021-02-09	CISM & ISGlobal, Institut de Salut Global de Barcelona	Instituto de Biomedicina de Valencia - CSIC	Mayor et al
140	hCoV-19/Mozambique/MZ-L-IBV-97025346/2021	EPI_ISL_2442110	2021-02-01	CISM & ISGlobal, Institut de Salut Global de Barcelona	Instituto de Biomedicina de Valencia - CSIC	Mayor et al
141	hCoV-19/Mozambique/MZ-L-IBV-97025347/2021	EPI_ISL_2442111	2021-02-25	CISM & ISGlobal, Institut de Salut Global de Barcelona	Instituto de Biomedicina de Valencia - CSIC	Mayor et al
142	hCoV-19/Mozambique/MZ-L-IBV-97025349/2021	EPI_ISL_2442112	2021-02-01	CISM & ISGlobal, Institut de Salut Global de Barcelona	Instituto de Biomedicina de Valencia - CSIC	Mayor et al
143	hCoV-19/Mozambique/MZ-L-IBV-97025350/2021	EPI_ISL_2442113	2021-01-14	CISM & ISGlobal, Institut de Salut Global de Barcelona	Instituto de Biomedicina de Valencia - CSIC	Mayor et al
144	hCoV-19/Mozambique/MZ-L-IBV-97025351/2021	EPI_ISL_2442114	2021-01-12	CISM & ISGlobal, Institut de Salut Global de Barcelona	Instituto de Biomedicina de Valencia - CSIC	Mayor et al
145	hCoV-19/Mozambique/MZ-L-IBV-97025352/2021	EPI_ISL_2442115	2021-01-12	CISM & ISGlobal, Institut de Salut Global de Barcelona	Instituto de Biomedicina de Valencia - CSIC	Mayor et al
146	hCoV-19/Mozambique/MZ-L-IBV-97025353/2021	EPI_ISL_2442116	2021-01-14	CISM & ISGlobal, Institut de Salut Global de Barcelona	Instituto de Biomedicina de Valencia - CSIC	Mayor et al
147	hCoV-19/Mozambique/MZ-L-IBV-97025354/2021	EPI_ISL_2442117	2021-01-14	CISM & ISGlobal, Institut de Salut Global de Barcelona	Instituto de Biomedicina de Valencia - CSIC	Mayor et al
148	hCoV-19/Mozambique/MZ-L-IBV-97025357/2021	EPI_ISL_2442118	2021-01-08	CISM & ISGlobal, Institut de Salut Global de Barcelona	Instituto de Biomedicina de Valencia - CSIC	Mayor et al
149	hCoV-19/Mozambique/MZ-L-IBV-97025359/2021	EPI_ISL_2442119	2021-02-09	CISM & ISGlobal, Institut de Salut Global de Barcelona	Instituto de Biomedicina de Valencia - CSIC	Mayor et al
150	hCoV-19/Mozambique/MZ-L-IBV-97025361/2021	EPI_ISL_2442120	2021-01-12	CISM & ISGlobal, Institut de Salut Global de Barcelona	Instituto de Biomedicina de Valencia - CSIC	Mayor et al
151	hCoV-19/Mozambique/MZ-L-IBV-97025363/2021	EPI_ISL_2442121	2021-01-25	CISM & ISGlobal, Institut de Salut Global de Barcelona	Instituto de Biomedicina de Valencia - CSIC	Mayor et al
152	hCoV-19/Mozambique/MZ-L-IBV-97025364/2021	EPI_ISL_2442122	2021-01-23	CISM & ISGlobal, Institut de Salut Global de Barcelona	Instituto de Biomedicina de Valencia - CSIC	Mayor et al
153	hCoV-19/Mozambique/MZ-L-IBV-97025365/2021	EPI_ISL_2442123	2021-01-23	CISM & ISGlobal, Institut de Salut Global de Barcelona	Instituto de Biomedicina de Valencia - CSIC	Mayor et al
154	hCoV-19/Mozambique/MZ-L-IBV-97025366/2021	EPI_ISL_2442124	2021-01-20	CISM & ISGlobal, Institut de Salut Global de Barcelona	Instituto de Biomedicina de Valencia - CSIC	Mayor et al
155	hCoV-19/Mozambique/MZ-L-IBV-97025367/2021	EPI_ISL_2442125	2021-01-23	CISM & ISGlobal, Institut de Salut Global de Barcelona	Instituto de Biomedicina de Valencia - CSIC	Mayor et al
156	hCoV-19/Mozambique/MZ-L-IBV-97025370/2021	EPI_ISL_2442126	2021-01-24	CISM & ISGlobal, Institut de Salut Global de Barcelona	Instituto de Biomedicina de Valencia - CSIC	Mayor et al
157	hCoV-19/Mozambique/MZ-L-IBV-97025368/2021	EPI_ISL_2442127	2021-01-23	CISM & ISGlobal, Institut de Salut Global de Barcelona	Instituto de Biomedicina de Valencia - CSIC	Mayor et al
158	hCoV-19/Mozambique/MZ-L-IBV-97025371/2021	EPI_ISL_2442128	2021-01-23	CISM & ISGlobal, Institut de Salut Global de Barcelona	Instituto de Biomedicina de Valencia - CSIC	Mayor et al
159	hCoV-19/Mozambique/MZ-L-IBV-97025373/2021	EPI_ISL_2442129	2021-01-23	CISM & ISGlobal, Institut de Salut Global de Barcelona	Instituto de Biomedicina de Valencia - CSIC	Mayor et al
160	hCoV-19/Mozambique/MZ-L-IBV-97025374/2021	EPI_ISL_2442130	2021-01-23	CISM & ISGlobal, Institut de Salut Global de Barcelona	Instituto de Biomedicina de Valencia - CSIC	Mayor et al
161	hCoV-19/Mozambique/MZ-L-IBV-97025376/2021	EPI_ISL_2442131	2021-01-23	CISM & ISGlobal, Institut de Salut Global de Barcelona	Instituto de Biomedicina de Valencia - CSIC	Mayor et al
162	hCoV-19/Mozambique/MZ-L-IBV-97025377/2021	EPI_ISL_2442132	2021-01-23	CISM & ISGlobal, Institut de Salut Global de Barcelona	Instituto de Biomedicina de Valencia - CSIC	Mayor et al
163	hCoV-19/Mozambique/MZ-L-IBV-97025378/2021	EPI_ISL_2442133	2021-01-23	CISM & ISGlobal, Institut de Salut Global de Barcelona	Instituto de Biomedicina de Valencia - CSIC	Mayor et al
164	hCoV-19/Mozambique/MZ-L-IBV-97025379/2021	EPI_ISL_2442134	2021-01-25	CISM & ISGlobal, Institut de Salut Global de Barcelona	Instituto de Biomedicina de Valencia - CSIC	Mayor et al
165	hCoV-19/Mozambique/MZ-L-IBV-97025380/2021	EPI_ISL_2442135	2021-01-24	CISM & ISGlobal, Institut de Salut Global de Barcelona	Instituto de Biomedicina de Valencia - CSIC	Mayor et al
166	hCoV-19/Mozambique/MZ-L-IBV-97025381/2021	EPI_ISL_2442136	2021-01-24	CISM & ISGlobal, Institut de Salut Global de Barcelona	Instituto de Biomedicina de Valencia - CSIC	Mayor et al
167	hCoV-19/Mozambique/MZ-L-IBV-97025385/2021	EPI_ISL_2442137	2021-01-24	CISM & ISGlobal, Institut de Salut Global de Barcelona	Instituto de Biomedicina de Valencia - CSIC	Mayor et al
168	hCoV-19/Mozambique/MZ-L-IBV-97025387/2021	EPI_ISL_2442139	2021-01-24	CISM & ISGlobal, Institut de Salut Global de Barcelona	Instituto de Biomedicina de Valencia - CSIC	Mayor et al
169	hCoV-19/Mozambique/MZ-L-IBV-97025388/2021	EPI_ISL_2442140	2021-01-24	CISM & ISGlobal, Institut de Salut Global de Barcelona	Instituto de Biomedicina de Valencia - CSIC	Mayor et al
170	hCoV-19/Mozambique/MZ-L-IBV-97025390/2021	EPI_ISL_2442141	2021-01-24	CISM & ISGlobal, Institut de Salut Global de Barcelona	Instituto de Biomedicina de Valencia - CSIC	Mayor et al
171	hCoV-19/Mozambique/MZ-L-IBV-97025391/2021	EPI_ISL_2442142	2021-01-24	CISM & ISGlobal, Institut de Salut Global de Barcelona	Instituto de Biomedicina de Valencia - CSIC	Mayor et al
172	hCoV-19/Mozambique/MZ-L-IBV-97025393/2021	EPI_ISL_2442143	2021-01-25	CISM & ISGlobal, Institut de Salut Global de Barcelona	Instituto de Biomedicina de Valencia - CSIC	Mayor et al
173	hCoV-19/Mozambique/MZ-L-IBV-97025394/2021	EPI_ISL_2442144	2021-01-24	CISM & ISGlobal, Institut de Salut Global de Barcelona	Instituto de Biomedicina de Valencia - CSIC	Mayor et al
174	hCoV-19/Mozambique/MZ-L-IBV-97025395/2021	EPI_ISL_2442145	2021-01-24	CISM & ISGlobal, Institut de Salut Global de Barcelona	Instituto de Biomedicina de Valencia - CSIC	Mayor et al
175	hCoV-19/Mozambique/MZ-L-IBV-97025396/2021	EPI_ISL_2442146	2021-01-24	CISM & ISGlobal, Institut de Salut Global de Barcelona	Instituto de Biomedicina de Valencia - CSIC	Mayor et al
176	hCoV-19/Mozambique/MZ-L-IBV-97025399/2021	EPI_ISL_2442147	2021-01-22	CISM & ISGlobal, Institut de Salut Global de Barcelona	Instituto de Biomedicina de Valencia - CSIC	Mayor et al
177	hCoV-19/Mozambique/MZ-L-IBV-97025401/2021	EPI_ISL_2442148	2021-01-13	CISM & ISGlobal, Institut de Salut Global de Barcelona	Instituto de Biomedicina de Valencia - CSIC	Mayor et al
178	hCoV-19/Mozambique/MZ-L-IBV-97025402/2021	EPI_ISL_2442149	2021-01-19	CISM & ISGlobal, Institut de Salut Global de Barcelona	Instituto de Biomedicina de Valencia - CSIC	Mayor et al
179	hCoV-19/Mozambique/MZ-L-IBV-97025403/2021	EPI_ISL_2442150	2021-01-21	CISM & ISGlobal, Institut de Salut Global de Barcelona	Instituto de Biomedicina de Valencia - CSIC	Mayor et al
180	hCoV-19/Mozambique/MZ-L-IBV-97025404/2020	EPI_ISL_2442151	2020-12-31	CISM & ISGlobal, Institut de Salut Global de Barcelona	Instituto de Biomedicina de Valencia - CSIC	Mayor et al
181	hCoV-19/Mozambique/MZ-L-IBV-97025406/2020	EPI_ISL_2442153	2020-12-30	CISM & ISGlobal, Institut de Salut Global de Barcelona	Instituto de Biomedicina de Valencia - CSIC	Mayor et al
182	hCoV-19/Mozambique/MZ-L-IBV-97025410/2021	EPI_ISL_2442156	2021-01-13	CISM & ISGlobal, Institut de Salut Global de Barcelona	Instituto de Biomedicina de Valencia - CSIC	Mayor et al
183	hCoV-19/Mozambique/MZ-L-IBV-97025411/2021	EPI_ISL_2442157	2021-01-13	CISM & ISGlobal, Institut de Salut Global de Barcelona	Instituto de Biomedicina de Valencia - CSIC	Mayor et al
184	hCoV-19/Mozambique/MZ-L-IBV-97025412/2021	EPI_ISL_2442158	2021-01-13	CISM & ISGlobal, Institut de Salut Global de Barcelona	Instituto de Biomedicina de Valencia - CSIC	Mayor et al
185	hCoV-19/Mozambique/MZ-L-IBV-97025413/2021	EPI_ISL_2442159	2021-01-21	CISM & ISGlobal, Institut de Salut Global de Barcelona	Instituto de Biomedicina de Valencia - CSIC	Mayor et al
186	hCoV-19/Mozambique/MZ-L-IBV-97025414/2021	EPI_ISL_2442160	2021-01-13	CISM & ISGlobal, Institut de Salut Global de Barcelona	Instituto de Biomedicina de Valencia - CSIC	Mayor et al
187	hCoV-19/Mozambique/MZ-L-IBV-97025415/2021	EPI_ISL_2442161	2021-01-13	CISM & ISGlobal, Institut de Salut Global de Barcelona	Instituto de Biomedicina de Valencia - CSIC	Mayor et al
188	hCoV-19/Mozambique/MZ-L-IBV-97025416/2021	EPI_ISL_2442162	2021-01-15	CISM & ISGlobal, Institut de Salut Global de Barcelona	Instituto de Biomedicina de Valencia - CSIC	Mayor et al
189	hCoV-19/Mozambique/MZ-L-IBV-97025417/2021	EPI_ISL_2442163	2021-01-14	CISM & ISGlobal, Institut de Salut Global de Barcelona	Instituto de Biomedicina de Valencia - CSIC	Mayor et al
190	hCoV-19/Mozambique/MZ-L-IBV-97025418/2021	EPI_ISL_2442164	2021-01-24	CISM & ISGlobal, Institut de Salut Global de Barcelona	Instituto de Biomedicina de Valencia - CSIC	Mayor et al
191	hCoV-19/Mozambique/MZ-L-IBV-97025419/2021	EPI_ISL_2442165	2021-01-18	CISM & ISGlobal, Institut de Salut Global de Barcelona	Instituto de Biomedicina de Valencia - CSIC	Mayor et al
192	hCoV-19/Mozambique/MZ-L-IBV-97025420/2021	EPI_ISL_2442166	2021-01-19	CISM & ISGlobal, Institut de Salut Global de Barcelona	Instituto de Biomedicina de Valencia - CSIC	Mayor et al
193	hCoV-19/Mozambique/MZ-L-IBV-97025421/2021	EPI_ISL_2442167	2021-01-17	CISM & ISGlobal, Institut de Salut Global de Barcelona	Instituto de Biomedicina de Valencia - CSIC	Mayor et al
194	hCoV-19/Mozambique/MZ-L-IBV-97025422/2021	EPI_ISL_2442168	2021-01-19	CISM & ISGlobal, Institut de Salut Global de Barcelona	Instituto de Biomedicina de Valencia - CSIC	Mayor et al
195	hCoV-19/Mozambique/MZ-L-IBV-97025423/2021	EPI_ISL_2442169	2021-01-19	CISM & ISGlobal, Institut de Salut Global de Barcelona	Instituto de Biomedicina de Valencia - CSIC	Mayor et al
196	hCoV-19/Mozambique/MZ-L-IBV-97025424/2021	EPI_ISL_2442170	2021-01-19	CISM & ISGlobal, Institut de Salut Global de Barcelona	Instituto de Biomedicina de Valencia - CSIC	Mayor et al
197	hCoV-19/Mozambique/MZ-L-IBV-97025427/2020	EPI_ISL_2442173	2020-12-30	CISM & ISGlobal, Institut de Salut Global de Barcelona	Instituto de Biomedicina de Valencia - CSIC	Mayor et al
198	hCoV-19/Mozambique/MZ-L-IBV-97025428/2021	EPI_ISL_2442174	2021-01-14	CISM & ISGlobal, Institut de Salut Global de Barcelona	Instituto de Biomedicina de Valencia - CSIC	Mayor et al
199	hCoV-19/Mozambique/MZ-L-IBV-97025429/2021	EPI_ISL_2442175	2021-01-14	CISM & ISGlobal, Institut de Salut Global de Barcelona	Instituto de Biomedicina de Valencia - CSIC	Mayor et al
200	hCoV-19/Mozambique/MZ-L-IBV-97025430/2021	EPI_ISL_2442176	2021-01-15	CISM & ISGlobal, Institut de Salut Global de Barcelona	Instituto de Biomedicina de Valencia - CSIC	Mayor et al
201	hCoV-19/Mozambique/MZ-L-IBV-97025431/2021	EPI_ISL_2442177	2021-01-14	CISM & ISGlobal, Institut de Salut Global de Barcelona	Instituto de Biomedicina de Valencia - CSIC	Mayor et al
202	hCoV-19/Mozambique/MZ-L-IBV-97025433/2021	EPI_ISL_2442178	2021-01-15	CISM & ISGlobal, Institut de Salut Global de Barcelona	Instituto de Biomedicina de Valencia - CSIC	Mayor et al
203	hCoV-19/Mozambique/MZ-L-IBV-97025434/2021	EPI_ISL_2442179	2021-01-15	CISM & ISGlobal, Institut de Salut Global de Barcelona	Instituto de Biomedicina de Valencia - CSIC	Mayor et al
204	hCoV-19/Mozambique/MZ-L-IBV-97025435/2020	EPI_ISL_2442180	2020-11-03	CISM & ISGlobal, Institut de Salut Global de Barcelona	Instituto de Biomedicina de Valencia - CSIC	Mayor et al
205	hCoV-19/Mozambique/MZ-L-IBV-97025436/2020	EPI_ISL_2442181	2020-11-04	CISM & ISGlobal, Institut de Salut Global de Barcelona	Instituto de Biomedicina de Valencia - CSIC	Mayor et al
206	hCoV-19/Mozambique/MZ-L-IBV-97025437/2020	EPI_ISL_2442182	2020-12-02	CISM & ISGlobal, Institut de Salut Global de Barcelona	Instituto de Biomedicina de Valencia - CSIC	Mayor et al
207	hCoV-19/Mozambique/MZ-L-IBV-97025438/2020	EPI_ISL_2442183	2020-11-23	CISM & ISGlobal, Institut de Salut Global de Barcelona	Instituto de Biomedicina de Valencia - CSIC	Mayor et al
208	hCoV-19/Mozambique/MZ-L-IBV-97025439/2020	EPI_ISL_2442184	2020-11-20	CISM & ISGlobal, Institut de Salut Global de Barcelona	Instituto de Biomedicina de Valencia - CSIC	Mayor et al
209	hCoV-19/Mozambique/MZ-L-IBV-97025440/2021	EPI_ISL_2442185	2021-01-08	CISM & ISGlobal, Institut de Salut Global de Barcelona	Instituto de Biomedicina de Valencia - CSIC	Mayor et al
210	hCoV-19/Mozambique/MZ-L-IBV-97025441/2020	EPI_ISL_2442186	2020-11-05	CISM & ISGlobal, Institut de Salut Global de Barcelona	Instituto de Biomedicina de Valencia - CSIC	Mayor et al
211	hCoV-19/Mozambique/MZ-L-IBV-97025442/2020	EPI_ISL_2442187	2020-11-09	CISM & ISGlobal, Institut de Salut Global de Barcelona	Instituto de Biomedicina de Valencia - CSIC	Mayor et al
212	hCoV-19/Mozambique/MZ-L-IBV-97025443/2020	EPI_ISL_2442188	2020-11-04	CISM & ISGlobal, Institut de Salut Global de Barcelona	Instituto de Biomedicina de Valencia - CSIC	Mayor et al
213	hCoV-19/Mozambique/MZ-L-IBV-97025444/2020	EPI_ISL_2442189	2020-12-02	CISM & ISGlobal, Institut de Salut Global de Barcelona	Instituto de Biomedicina de Valencia - CSIC	Mayor et al
214	hCoV-19/Mozambique/MZ-L-IBV-97025447/2020	EPI_ISL_2442190	2020-11-03	CISM & ISGlobal, Institut de Salut Global de Barcelona	Instituto de Biomedicina de Valencia - CSIC	Mayor et al
215	hCoV-19/Mozambique/MZ-L-IBV-97025449/2020	EPI_ISL_2442191	2020-11-23	CISM & ISGlobal, Institut de Salut Global de Barcelona	Instituto de Biomedicina de Valencia - CSIC	Mayor et al
216	hCoV-19/Mozambique/MZ-L-IBV-97025451/2020	EPI_ISL_2442192	2020-11-09	CISM & ISGlobal, Institut de Salut Global de Barcelona	Instituto de Biomedicina de Valencia - CSIC	Mayor et al
217	hCoV-19/Mozambique/MZ-L-IBV-97025452/2021	EPI_ISL_2442193	2021-01-18	CISM & ISGlobal, Institut de Salut Global de Barcelona	Instituto de Biomedicina de Valencia - CSIC	Mayor et al
218	hCoV-19/Mozambique/MZ-L-IBV-97025453/2021	EPI_ISL_2442194	2021-01-18	CISM & ISGlobal, Institut de Salut Global de Barcelona	Instituto de Biomedicina de Valencia - CSIC	Mayor et al
219	hCoV-19/Mozambique/MZ-L-IBV-97025454/2021	EPI_ISL_2442195	2021-02-01	CISM & ISGlobal, Institut de Salut Global de Barcelona	Instituto de Biomedicina de Valencia - CSIC	Mayor et al
220	hCoV-19/Mozambique/MZ-L-IBV-97025455/2021	EPI_ISL_2442196	2021-02-02	CISM & ISGlobal, Institut de Salut Global de Barcelona	Instituto de Biomedicina de Valencia - CSIC	Mayor et al
221	hCoV-19/Mozambique/MZ-L-IBV-97025458/2021	EPI_ISL_2442197	2021-02-02	CISM & ISGlobal, Institut de Salut Global de Barcelona	Instituto de Biomedicina de Valencia - CSIC	Mayor et al
222	hCoV-19/Mozambique/MZ-L-IBV-97025459/2021	EPI_ISL_2442198	2021-02-01	CISM & ISGlobal, Institut de Salut Global de Barcelona	Instituto de Biomedicina de Valencia - CSIC	Mayor et al
223	hCoV-19/Mozambique/MZ-L-IBV-97025461/2021	EPI_ISL_2442199	2021-02-02	CISM & ISGlobal, Institut de Salut Global de Barcelona	Instituto de Biomedicina de Valencia - CSIC	Mayor et al
224	hCoV-19/Mozambique/MZ-L-IBV-97025463/2021	EPI_ISL_2442200	2021-02-28	CISM & ISGlobal, Institut de Salut Global de Barcelona	Instituto de Biomedicina de Valencia - CSIC	Mayor et al
225	hCoV-19/Mozambique/MZ-L-IBV-97025464/2021	EPI_ISL_2442201	2021-02-28	CISM & ISGlobal, Institut de Salut Global de Barcelona	Instituto de Biomedicina de Valencia - CSIC	Mayor et al
226	hCoV-19/Mozambique/MZ-L-IBV-97025466/2021	EPI_ISL_2442202	2021-02-26	CISM & ISGlobal, Institut de Salut Global de Barcelona	Instituto de Biomedicina de Valencia - CSIC	Mayor et al
227	hCoV-19/Mozambique/CERI-KRISP-K016004/2021	EPI_ISL_3447992	2021-03-25	Instituto Nacional de Saude (INS)	CERI, Centre for Epidemic Response and Innvoation, Stellenbosch University and KRISP, KZN Research Innovation and Sequencing Platform, UKZN.	Ismael et al
228	hCoV-19/Mozambique/CERI-KRISP-K016049/2021	EPI_ISL_3447996	2021-04-16	Instituto Nacional de Saude (INS)	CERI, Centre for Epidemic Response and Innvoation, Stellenbosch University and KRISP, KZN Research Innovation and Sequencing Platform, UKZN.	Ismael et al
229	hCoV-19/Mozambique/CERI-KRISP-K015029/2021	EPI_ISL_2617094	2021-03-12	Instituto Nacional de Saude (INS)	CERI, Centre for Epidemic Response and Innvoation, Stellenbosch University and KRISP, KZN Research Innovation and Sequencing Platform, UKZN.	Ismael et al
230	hCoV-19/Mozambique/CERI-KRISP-K015008/2021	EPI_ISL_2617095	2021-03-09	Instituto Nacional de Saude (INS)	CERI, Centre for Epidemic Response and Innvoation, Stellenbosch University and KRISP, KZN Research Innovation and Sequencing Platform, UKZN.	Ismael et al
231	hCoV-19/Mozambique/CERI-KRISP-K015069/2021	EPI_ISL_2617096	2021-03-18	Instituto Nacional de Saude (INS)	CERI, Centre for Epidemic Response and Innvoation, Stellenbosch University and KRISP, KZN Research Innovation and Sequencing Platform, UKZN.	Ismael et al
232	hCoV-19/Mozambique/CERI-KRISP-K015033/2021	EPI_ISL_2617097	2021-03-12	Instituto Nacional de Saude (INS)	CERI, Centre for Epidemic Response and Innvoation, Stellenbosch University and KRISP, KZN Research Innovation and Sequencing Platform, UKZN.	Ismael et al
233	hCoV-19/Mozambique/CERI-KRISP-K015062/2021	EPI_ISL_2617098	2021-03-17	Instituto Nacional de Saude (INS)	CERI, Centre for Epidemic Response and Innvoation, Stellenbosch University and KRISP, KZN Research Innovation and Sequencing Platform, UKZN.	Ismael et al
234	hCoV-19/Mozambique/CERI-KRISP-K015075/2021	EPI_ISL_2617099	2021-03-18	Instituto Nacional de Saude (INS)	CERI, Centre for Epidemic Response and Innvoation, Stellenbosch University and KRISP, KZN Research Innovation and Sequencing Platform, UKZN.	Ismael et al
235	hCoV-19/Mozambique/CERI-KRISP-K015089/2021	EPI_ISL_2617100	2021-04-28	Instituto Nacional de Saude (INS)	CERI, Centre for Epidemic Response and Innvoation, Stellenbosch University and KRISP, KZN Research Innovation and Sequencing Platform, UKZN.	Ismael et al
236	hCoV-19/Mozambique/CERI-KRISP-K015053/2021	EPI_ISL_2617101	2021-03-17	Instituto Nacional de Saude (INS)	CERI, Centre for Epidemic Response and Innvoation, Stellenbosch University and KRISP, KZN Research Innovation and Sequencing Platform, UKZN.	Ismael et al
237	hCoV-19/Mozambique/CERI-KRISP-K015005/2021	EPI_ISL_2617102	2021-03-09	Instituto Nacional de Saude (INS)	CERI, Centre for Epidemic Response and Innvoation, Stellenbosch University and KRISP, KZN Research Innovation and Sequencing Platform, UKZN.	Ismael et al
238	hCoV-19/Mozambique/CERI-KRISP-K015022/2021	EPI_ISL_2617103	2021-03-11	Instituto Nacional de Saude (INS)	CERI, Centre for Epidemic Response and Innvoation, Stellenbosch University and KRISP, KZN Research Innovation and Sequencing Platform, UKZN.	Ismael et al
239	hCoV-19/Mozambique/CERI-KRISP-K015064/2021	EPI_ISL_2617104	2021-03-18	Instituto Nacional de Saude (INS)	CERI, Centre for Epidemic Response and Innvoation, Stellenbosch University and KRISP, KZN Research Innovation and Sequencing Platform, UKZN.	Ismael et al
240	hCoV-19/Mozambique/CERI-KRISP-K015063/2021	EPI_ISL_2617105	2021-03-18	Instituto Nacional de Saude (INS)	CERI, Centre for Epidemic Response and Innvoation, Stellenbosch University and KRISP, KZN Research Innovation and Sequencing Platform, UKZN.	Ismael et al
241	hCoV-19/Mozambique/CERI-KRISP-K015081/2021	EPI_ISL_2617106	2021-03-18	Instituto Nacional de Saude (INS)	CERI, Centre for Epidemic Response and Innvoation, Stellenbosch University and KRISP, KZN Research Innovation and Sequencing Platform, UKZN.	Ismael et al
242	hCoV-19/Mozambique/CERI-KRISP-K015060/2021	EPI_ISL_2617107	2021-03-17	Instituto Nacional de Saude (INS)	CERI, Centre for Epidemic Response and Innvoation, Stellenbosch University and KRISP, KZN Research Innovation and Sequencing Platform, UKZN.	Ismael et al
243	hCoV-19/Mozambique/CERI-KRISP-K015041/2021	EPI_ISL_2617108	2021-03-16	Instituto Nacional de Saude (INS)	CERI, Centre for Epidemic Response and Innvoation, Stellenbosch University and KRISP, KZN Research Innovation and Sequencing Platform, UKZN.	Ismael et al
244	hCoV-19/Mozambique/CERI-KRISP-K015020/2021	EPI_ISL_2617109	2021-03-11	Instituto Nacional de Saude (INS)	CERI, Centre for Epidemic Response and Innvoation, Stellenbosch University and KRISP, KZN Research Innovation and Sequencing Platform, UKZN.	Ismael et al
245	hCoV-19/Mozambique/CERI-KRISP-K015012/2021	EPI_ISL_2617110	2021-03-10	Instituto Nacional de Saude (INS)	CERI, Centre for Epidemic Response and Innvoation, Stellenbosch University and KRISP, KZN Research Innovation and Sequencing Platform, UKZN.	Ismael et al
246	hCoV-19/Mozambique/CERI-KRISP-K015006/2021	EPI_ISL_2617111	2021-03-09	Instituto Nacional de Saude (INS)	CERI, Centre for Epidemic Response and Innvoation, Stellenbosch University and KRISP, KZN Research Innovation and Sequencing Platform, UKZN.	Ismael et al
247	hCoV-19/Mozambique/CERI-KRISP-K015039/2021	EPI_ISL_2617112	2021-03-13	Instituto Nacional de Saude (INS)	CERI, Centre for Epidemic Response and Innvoation, Stellenbosch University and KRISP, KZN Research Innovation and Sequencing Platform, UKZN.	Ismael et al
248	hCoV-19/Mozambique/CERI-KRISP-K015068/2021	EPI_ISL_2617113	2021-03-18	Instituto Nacional de Saude (INS)	CERI, Centre for Epidemic Response and Innvoation, Stellenbosch University and KRISP, KZN Research Innovation and Sequencing Platform, UKZN.	Ismael et al
249	hCoV-19/Mozambique/CERI-KRISP-K015026/2021	EPI_ISL_2617115	2021-03-12	Instituto Nacional de Saude (INS)	CERI, Centre for Epidemic Response and Innvoation, Stellenbosch University and KRISP, KZN Research Innovation and Sequencing Platform, UKZN.	Ismael et al
250	hCoV-19/Mozambique/CERI-KRISP-K015052/2021	EPI_ISL_2617116	2021-03-17	Instituto Nacional de Saude (INS)	CERI, Centre for Epidemic Response and Innvoation, Stellenbosch University and KRISP, KZN Research Innovation and Sequencing Platform, UKZN.	Ismael et al
251	hCoV-19/Mozambique/CERI-KRISP-K015061/2021	EPI_ISL_2617117	2021-03-17	Instituto Nacional de Saude (INS)	CERI, Centre for Epidemic Response and Innvoation, Stellenbosch University and KRISP, KZN Research Innovation and Sequencing Platform, UKZN.	Ismael et al
252	hCoV-19/Mozambique/CERI-KRISP-K015004/2021	EPI_ISL_2617118	2021-03-09	Instituto Nacional de Saude (INS)	CERI, Centre for Epidemic Response and Innvoation, Stellenbosch University and KRISP, KZN Research Innovation and Sequencing Platform, UKZN.	Ismael et al
253	hCoV-19/Mozambique/CERI-KRISP-K015072/2021	EPI_ISL_2617119	2021-03-18	Instituto Nacional de Saude (INS)	CERI, Centre for Epidemic Response and Innvoation, Stellenbosch University and KRISP, KZN Research Innovation and Sequencing Platform, UKZN.	Ismael et al
254	hCoV-19/Mozambique/CERI-KRISP-K015035/2021	EPI_ISL_2617120	2021-03-12	Instituto Nacional de Saude (INS)	CERI, Centre for Epidemic Response and Innvoation, Stellenbosch University and KRISP, KZN Research Innovation and Sequencing Platform, UKZN.	Ismael et al
255	hCoV-19/Mozambique/CERI-KRISP-K015032/2021	EPI_ISL_2617121	2021-03-12	Instituto Nacional de Saude (INS)	CERI, Centre for Epidemic Response and Innvoation, Stellenbosch University and KRISP, KZN Research Innovation and Sequencing Platform, UKZN.	Ismael et al
256	hCoV-19/Mozambique/CERI-KRISP-K015087/2021	EPI_ISL_2617123	2021-03-21	Instituto Nacional de Saude (INS)	CERI, Centre for Epidemic Response and Innvoation, Stellenbosch University and KRISP, KZN Research Innovation and Sequencing Platform, UKZN.	Ismael et al
257	hCoV-19/Mozambique/CERI-KRISP-K015038/2021	EPI_ISL_2617124	2021-03-12	Instituto Nacional de Saude (INS)	CERI, Centre for Epidemic Response and Innvoation, Stellenbosch University and KRISP, KZN Research Innovation and Sequencing Platform, UKZN.	Ismael et al
258	hCoV-19/Mozambique/CERI-KRISP-K015086/2021	EPI_ISL_2617127	2021-03-21	Instituto Nacional de Saude (INS)	CERI, Centre for Epidemic Response and Innvoation, Stellenbosch University and KRISP, KZN Research Innovation and Sequencing Platform, UKZN.	Ismael et al
259	hCoV-19/Mozambique/CERI-KRISP-K015034/2021	EPI_ISL_2617128	2021-03-12	Instituto Nacional de Saude (INS)	CERI, Centre for Epidemic Response and Innvoation, Stellenbosch University and KRISP, KZN Research Innovation and Sequencing Platform, UKZN.	Ismael et al
260	hCoV-19/Mozambique/CERI-KRISP-K015088/2021	EPI_ISL_2617129	2021-03-21	Instituto Nacional de Saude (INS)	CERI, Centre for Epidemic Response and Innvoation, Stellenbosch University and KRISP, KZN Research Innovation and Sequencing Platform, UKZN.	Ismael et al
261	hCoV-19/Mozambique/CERI-KRISP-K015042/2021	EPI_ISL_2617131	2021-03-16	Instituto Nacional de Saude (INS)	CERI, Centre for Epidemic Response and Innvoation, Stellenbosch University and KRISP, KZN Research Innovation and Sequencing Platform, UKZN.	Ismael et al
262	hCoV-19/Mozambique/CERI-KRISP-K015059/2021	EPI_ISL_2617132	2021-03-18	Instituto Nacional de Saude (INS)	CERI, Centre for Epidemic Response and Innvoation, Stellenbosch University and KRISP, KZN Research Innovation and Sequencing Platform, UKZN.	Ismael et al
263	hCoV-19/Mozambique/CERI-KRISP-K015043/2021	EPI_ISL_2617134	2021-03-16	Instituto Nacional de Saude (INS)	CERI, Centre for Epidemic Response and Innvoation, Stellenbosch University and KRISP, KZN Research Innovation and Sequencing Platform, UKZN.	Ismael et al
264	hCoV-19/Mozambique/CERI-KRISP-K015027/2021	EPI_ISL_2617137	2021-03-12	Instituto Nacional de Saude (INS)	CERI, Centre for Epidemic Response and Innvoation, Stellenbosch University and KRISP, KZN Research Innovation and Sequencing Platform, UKZN.	Ismael et al
265	hCoV-19/Mozambique/CERI-KRISP-K015070/2021	EPI_ISL_2617138	2021-03-18	Instituto Nacional de Saude (INS)	CERI, Centre for Epidemic Response and Innvoation, Stellenbosch University and KRISP, KZN Research Innovation and Sequencing Platform, UKZN.	Ismael et al
266	hCoV-19/Mozambique/CERI-KRISP-K015055/2021	EPI_ISL_2617139	2021-03-17	Instituto Nacional de Saude (INS)	CERI, Centre for Epidemic Response and Innvoation, Stellenbosch University and KRISP, KZN Research Innovation and Sequencing Platform, UKZN.	Ismael et al
267	hCoV-19/Mozambique/CERI-KRISP-K015057/2021	EPI_ISL_2617142	2021-03-17	Instituto Nacional de Saude (INS)	CERI, Centre for Epidemic Response and Innvoation, Stellenbosch University and KRISP, KZN Research Innovation and Sequencing Platform, UKZN.	Ismael et al
268	hCoV-19/Mozambique/CERI-KRISP-K015056/2021	EPI_ISL_2617143	2021-03-17	Instituto Nacional de Saude (INS)	CERI, Centre for Epidemic Response and Innvoation, Stellenbosch University and KRISP, KZN Research Innovation and Sequencing Platform, UKZN.	Ismael et al
269	hCoV-19/Mozambique/CERI-KRISP-K015051/2021	EPI_ISL_2617145	2021-03-17	Instituto Nacional de Saude (INS)	CERI, Centre for Epidemic Response and Innvoation, Stellenbosch University and KRISP, KZN Research Innovation and Sequencing Platform, UKZN.	Ismael et al
270	hCoV-19/Mozambique/CERI-KRISP-K015009/2021	EPI_ISL_2617146	2021-03-09	Instituto Nacional de Saude (INS)	CERI, Centre for Epidemic Response and Innvoation, Stellenbosch University and KRISP, KZN Research Innovation and Sequencing Platform, UKZN.	Ismael et al
271	hCoV-19/Mozambique/CERI-KRISP-K015015/2021	EPI_ISL_2617149	2021-03-10	Instituto Nacional de Saude (INS)	CERI, Centre for Epidemic Response and Innvoation, Stellenbosch University and KRISP, KZN Research Innovation and Sequencing Platform, UKZN.	Ismael et al
272	hCoV-19/Mozambique/CERI-KRISP-K015085/2021	EPI_ISL_2617151	2021-03-21	Instituto Nacional de Saude (INS)	CERI, Centre for Epidemic Response and Innvoation, Stellenbosch University and KRISP, KZN Research Innovation and Sequencing Platform, UKZN.	Ismael et al
273	hCoV-19/Mozambique/CERI-KRISP-K015037/2021	EPI_ISL_2617152	2021-03-12	Instituto Nacional de Saude (INS)	CERI, Centre for Epidemic Response and Innvoation, Stellenbosch University and KRISP, KZN Research Innovation and Sequencing Platform, UKZN.	Ismael et al
274	hCoV-19/Mozambique/CERI-KRISP-K015046/2021	EPI_ISL_2617154	2021-03-17	Instituto Nacional de Saude (INS)	CERI, Centre for Epidemic Response and Innvoation, Stellenbosch University and KRISP, KZN Research Innovation and Sequencing Platform, UKZN.	Ismael et al
275	hCoV-19/Mozambique/CERI-KRISP-K015028/2021	EPI_ISL_2617155	2021-03-12	Instituto Nacional de Saude (INS)	CERI, Centre for Epidemic Response and Innvoation, Stellenbosch University and KRISP, KZN Research Innovation and Sequencing Platform, UKZN.	Ismael et al
276	hCoV-19/Mozambique/CERI-KRISP-K015019/2021	EPI_ISL_2617156	2021-03-11	Instituto Nacional de Saude (INS)	CERI, Centre for Epidemic Response and Innvoation, Stellenbosch University and KRISP, KZN Research Innovation and Sequencing Platform, UKZN.	Ismael et al
277	hCoV-19/Mozambique/CERI-KRISP-K015084/2021	EPI_ISL_2617158	2021-03-20	Instituto Nacional de Saude (INS)	CERI, Centre for Epidemic Response and Innvoation, Stellenbosch University and KRISP, KZN Research Innovation and Sequencing Platform, UKZN.	Ismael et al
278	hCoV-19/Mozambique/CERI-KRISP-K015018/2021	EPI_ISL_2617159	2021-03-11	Instituto Nacional de Saude (INS)	CERI, Centre for Epidemic Response and Innvoation, Stellenbosch University and KRISP, KZN Research Innovation and Sequencing Platform, UKZN.	Ismael et al
279	hCoV-19/Mozambique/CERI-KRISP-K015083/2021	EPI_ISL_2617161	2021-03-20	Instituto Nacional de Saude (INS)	CERI, Centre for Epidemic Response and Innvoation, Stellenbosch University and KRISP, KZN Research Innovation and Sequencing Platform, UKZN.	Ismael et al
280	hCoV-19/Mozambique/CERI-KRISP-K015017/2021	EPI_ISL_2617162	2021-03-11	Instituto Nacional de Saude (INS)	CERI, Centre for Epidemic Response and Innvoation, Stellenbosch University and KRISP, KZN Research Innovation and Sequencing Platform, UKZN.	Ismael et al
281	hCoV-19/Mozambique/CERI-KRISP-K015082/2021	EPI_ISL_2617163	2021-03-20	Instituto Nacional de Saude (INS)	CERI, Centre for Epidemic Response and Innvoation, Stellenbosch University and KRISP, KZN Research Innovation and Sequencing Platform, UKZN.	Ismael et al
282	hCoV-19/Mozambique/CERI-KRISP-K015025/2021	EPI_ISL_2617164	2021-03-12	Instituto Nacional de Saude (INS)	CERI, Centre for Epidemic Response and Innvoation, Stellenbosch University and KRISP, KZN Research Innovation and Sequencing Platform, UKZN.	Ismael et al
283	hCoV-19/Mozambique/CERI-KRISP-K015047/2021	EPI_ISL_2617166	2021-03-17	Instituto Nacional de Saude (INS)	CERI, Centre for Epidemic Response and Innvoation, Stellenbosch University and KRISP, KZN Research Innovation and Sequencing Platform, UKZN.	Ismael et al
284	hCoV-19/Mozambique/CERI-KRISP-K015007/2021	EPI_ISL_2617168	2021-03-09	Instituto Nacional de Saude (INS)	CERI, Centre for Epidemic Response and Innvoation, Stellenbosch University and KRISP, KZN Research Innovation and Sequencing Platform, UKZN.	Ismael et al
285	hCoV-19/Mozambique/CERI-KRISP-K015054/2021	EPI_ISL_2617170	2021-03-17	Instituto Nacional de Saude (INS)	CERI, Centre for Epidemic Response and Innvoation, Stellenbosch University and KRISP, KZN Research Innovation and Sequencing Platform, UKZN.	Ismael et al
286	hCoV-19/Mozambique/CERI-KRISP-K015014/2021	EPI_ISL_2617172	2021-03-10	Instituto Nacional de Saude (INS)	CERI, Centre for Epidemic Response and Innvoation, Stellenbosch University and KRISP, KZN Research Innovation and Sequencing Platform, UKZN.	Ismael et al
287	hCoV-19/Mozambique/CERI-KRISP-K015074/2021	EPI_ISL_2617173	2021-03-18	Instituto Nacional de Saude (INS)	CERI, Centre for Epidemic Response and Innvoation, Stellenbosch University and KRISP, KZN Research Innovation and Sequencing Platform, UKZN.	Ismael et al
288	hCoV-19/Mozambique/CERI-KRISP-K015030/2021	EPI_ISL_2617174	2021-03-12	Instituto Nacional de Saude (INS)	CERI, Centre for Epidemic Response and Innvoation, Stellenbosch University and KRISP, KZN Research Innovation and Sequencing Platform, UKZN.	Ismael et al
289	hCoV-19/Mozambique/CERI-KRISP-K015067/2021	EPI_ISL_2617175	2021-03-18	Instituto Nacional de Saude (INS)	CERI, Centre for Epidemic Response and Innvoation, Stellenbosch University and KRISP, KZN Research Innovation and Sequencing Platform, UKZN.	Ismael et al
290	hCoV-19/Mozambique/CERI-KRISP-K015071/2021	EPI_ISL_2617176	2021-03-18	Instituto Nacional de Saude (INS)	CERI, Centre for Epidemic Response and Innvoation, Stellenbosch University and KRISP, KZN Research Innovation and Sequencing Platform, UKZN.	Ismael et al
291	hCoV-19/Mozambique/CERI-KRISP-K015040/2021	EPI_ISL_2617177	2021-03-13	Instituto Nacional de Saude (INS)	CERI, Centre for Epidemic Response and Innvoation, Stellenbosch University and KRISP, KZN Research Innovation and Sequencing Platform, UKZN.	Ismael et al
292	hCoV-19/Mozambique/CERI-KRISP-K015024/2021	EPI_ISL_2617178	2021-03-12	Instituto Nacional de Saude (INS)	CERI, Centre for Epidemic Response and Innvoation, Stellenbosch University and KRISP, KZN Research Innovation and Sequencing Platform, UKZN.	Ismael et al
293	hCoV-19/Mozambique/CERI-KRISP-K015058/2021	EPI_ISL_2617179	2021-03-17	Instituto Nacional de Saude (INS)	CERI, Centre for Epidemic Response and Innvoation, Stellenbosch University and KRISP, KZN Research Innovation and Sequencing Platform, UKZN.	Ismael et al
294	hCoV-19/Mozambique/CERI-KRISP-K015031/2021	EPI_ISL_2617180	2021-03-12	Instituto Nacional de Saude (INS)	CERI, Centre for Epidemic Response and Innvoation, Stellenbosch University and KRISP, KZN Research Innovation and Sequencing Platform, UKZN.	Ismael et al
295	hCoV-19/Mozambique/CERI-KRISP-K015016/2021	EPI_ISL_2617184	2021-03-10	Instituto Nacional de Saude (INS)	CERI, Centre for Epidemic Response and Innvoation, Stellenbosch University and KRISP, KZN Research Innovation and Sequencing Platform, UKZN.	Ismael et al
296	hCoV-19/Mozambique/CERI-KRISP-K015021/2021	EPI_ISL_2617185	2021-03-11	Instituto Nacional de Saude (INS)	CERI, Centre for Epidemic Response and Innvoation, Stellenbosch University and KRISP, KZN Research Innovation and Sequencing Platform, UKZN.	Ismael et al
297	hCoV-19/Mozambique/CERI-KRISP-K033874/2021	EPI_ISL_9418723	2021-12-08	Instituto Nacional de Saude (INS)	CERI, Centre for Epidemic Response and Innovation, Stellenbosch University and KRISP, KZN Research Innovation and Sequencing Platform, UKZN.	Ismael et al
298	hCoV-19/Mozambique/CERI-KRISP-K033852/2021	EPI_ISL_9418717	2021-12-08	Instituto Nacional de Saude (INS)	CERI, Centre for Epidemic Response and Innovation, Stellenbosch University and KRISP, KZN Research Innovation and Sequencing Platform, UKZN.	Ismael et al
299	hCoV-19/Mozambique/CERI-KRISP-K033887/2021	EPI_ISL_9418731	2021-12-11	Instituto Nacional de Saude (INS)	CERI, Centre for Epidemic Response and Innovation, Stellenbosch University and KRISP, KZN Research Innovation and Sequencing Platform, UKZN.	Ismael et al
300	hCoV-19/Mozambique/CERI-KRISP-K033861/2021	EPI_ISL_9418714	2021-12-04	Instituto Nacional de Saude (INS)	CERI, Centre for Epidemic Response and Innovation, Stellenbosch University and KRISP, KZN Research Innovation and Sequencing Platform, UKZN.	Ismael et al
301	hCoV-19/Mozambique/CERI-KRISP-K033846/2021	EPI_ISL_9418735	2021-12-08	Instituto Nacional de Saude (INS)	CERI, Centre for Epidemic Response and Innovation, Stellenbosch University and KRISP, KZN Research Innovation and Sequencing Platform, UKZN.	Ismael et al
302	hCoV-19/Mozambique/CERI-KRISP-K033870/2021	EPI_ISL_9418736	2021-12-06	Instituto Nacional de Saude (INS)	CERI, Centre for Epidemic Response and Innovation, Stellenbosch University and KRISP, KZN Research Innovation and Sequencing Platform, UKZN.	Ismael et al
303	hCoV-19/Mozambique/CERI-KRISP-K033857/2021	EPI_ISL_9418718	2021-12-08	Instituto Nacional de Saude (INS)	CERI, Centre for Epidemic Response and Innovation, Stellenbosch University and KRISP, KZN Research Innovation and Sequencing Platform, UKZN.	Ismael et al
304	hCoV-19/Mozambique/CERI-KRISP-K033872/2021	EPI_ISL_9418722	2021-12-08	Instituto Nacional de Saude (INS)	CERI, Centre for Epidemic Response and Innovation, Stellenbosch University and KRISP, KZN Research Innovation and Sequencing Platform, UKZN.	Ismael et al
305	hCoV-19/Mozambique/CERI-KRISP-K033878/2021	EPI_ISL_9418725	2021-12-11	Instituto Nacional de Saude (INS)	CERI, Centre for Epidemic Response and Innovation, Stellenbosch University and KRISP, KZN Research Innovation and Sequencing Platform, UKZN.	Ismael et al
306	hCoV-19/Mozambique/CERI-KRISP-K033875/2021	EPI_ISL_9418724	2021-12-08	Instituto Nacional de Saude (INS)	CERI, Centre for Epidemic Response and Innovation, Stellenbosch University and KRISP, KZN Research Innovation and Sequencing Platform, UKZN.	Ismael et al
307	hCoV-19/Mozambique/CERI-KRISP-K033891/2021	EPI_ISL_9418733	2021-12-11	Instituto Nacional de Saude (INS)	CERI, Centre for Epidemic Response and Innovation, Stellenbosch University and KRISP, KZN Research Innovation and Sequencing Platform, UKZN.	Ismael et al
308	hCoV-19/Mozambique/CERI-KRISP-K033885/2021	EPI_ISL_9418729	2021-12-11	Instituto Nacional de Saude (INS)	CERI, Centre for Epidemic Response and Innovation, Stellenbosch University and KRISP, KZN Research Innovation and Sequencing Platform, UKZN.	Ismael et al
309	hCoV-19/Mozambique/CERI-KRISP-K033892/2021	EPI_ISL_9418734	2021-12-11	Instituto Nacional de Saude (INS)	CERI, Centre for Epidemic Response and Innovation, Stellenbosch University and KRISP, KZN Research Innovation and Sequencing Platform, UKZN.	Ismael et al
310	hCoV-19/Mozambique/CERI-KRISP-K033871/2021	EPI_ISL_9418721	2021-12-08	Instituto Nacional de Saude (INS)	CERI, Centre for Epidemic Response and Innovation, Stellenbosch University and KRISP, KZN Research Innovation and Sequencing Platform, UKZN.	Ismael et al
311	hCoV-19/Mozambique/CERI-KRISP-K033867/2021	EPI_ISL_9418719	2021-12-08	Instituto Nacional de Saude (INS)	CERI, Centre for Epidemic Response and Innovation, Stellenbosch University and KRISP, KZN Research Innovation and Sequencing Platform, UKZN.	Ismael et al
312	hCoV-19/Mozambique/CERI-KRISP-K033882/2021	EPI_ISL_9418728	2021-12-11	Instituto Nacional de Saude (INS)	CERI, Centre for Epidemic Response and Innovation, Stellenbosch University and KRISP, KZN Research Innovation and Sequencing Platform, UKZN.	Ismael et al
313	hCoV-19/Mozambique/CERI-KRISP-K033860/2021	EPI_ISL_9418713	2021-12-04	Instituto Nacional de Saude (INS)	CERI, Centre for Epidemic Response and Innovation, Stellenbosch University and KRISP, KZN Research Innovation and Sequencing Platform, UKZN.	Ismael et al
314	hCoV-19/Mozambique/CERI-KRISP-K033888/2021	EPI_ISL_9418732	2021-12-11	Instituto Nacional de Saude (INS)	CERI, Centre for Epidemic Response and Innovation, Stellenbosch University and KRISP, KZN Research Innovation and Sequencing Platform, UKZN.	Ismael et al
315	hCoV-19/Mozambique/CERI-KRISP-K033886/2021	EPI_ISL_9418730	2021-12-11	Instituto Nacional de Saude (INS)	CERI, Centre for Epidemic Response and Innovation, Stellenbosch University and KRISP, KZN Research Innovation and Sequencing Platform, UKZN.	Ismael et al
316	hCoV-19/Mozambique/CERI-KRISP-K033862/2021	EPI_ISL_9418715	2021-12-07	Instituto Nacional de Saude (INS)	CERI, Centre for Epidemic Response and Innovation, Stellenbosch University and KRISP, KZN Research Innovation and Sequencing Platform, UKZN.	Ismael et al
317	hCoV-19/Mozambique/CERI-KRISP-K033880/2021	EPI_ISL_9418726	2021-12-11	Instituto Nacional de Saude (INS)	CERI, Centre for Epidemic Response and Innovation, Stellenbosch University and KRISP, KZN Research Innovation and Sequencing Platform, UKZN.	Ismael et al
318	hCoV-19/Mozambique/CERI-KRISP-K033850/2021	EPI_ISL_9418716	2021-12-08	Instituto Nacional de Saude (INS)	CERI, Centre for Epidemic Response and Innovation, Stellenbosch University and KRISP, KZN Research Innovation and Sequencing Platform, UKZN.	Ismael et al
319	hCoV-19/Mozambique/CERI-KRISP-K033881/2021	EPI_ISL_9418727	2021-12-11	Instituto Nacional de Saude (INS)	CERI, Centre for Epidemic Response and Innovation, Stellenbosch University and KRISP, KZN Research Innovation and Sequencing Platform, UKZN.	Ismael et al
320	hCoV-19/Mozambique/COV-2156-A1803/2021	EPI_ISL_5822667	2021-04-05	Instiuto Nacional de Saude, Mozambique	Forschungszentrum Borstel	Upatel et al
321	hCoV-19/Mozambique/COV-2374-A2023/2021	EPI_ISL_5822564	2021-04-01	Instiuto Nacional de Saude, Mozambique	Forschungszentrum Borstel	Upatel et al
322	hCoV-19/Mozambique/COV-2139-A1786/2021	EPI_ISL_5822549	2021-06-22	Instiuto Nacional de Saude, Mozambique	Forschungszentrum Borstel	Upatel et al
323	hCoV-19/Mozambique/COV-2346-A1995/2021	EPI_ISL_5822559	2021-05-29	Instiuto Nacional de Saude, Mozambique	Forschungszentrum Borstel	Upatel et al
324	hCoV-19/Mozambique/COV-2354-A2003/2021	EPI_ISL_5822561	2021-05-22	Instiuto Nacional de Saude, Mozambique	Forschungszentrum Borstel	Upatel et al
325	hCoV-19/Mozambique/COV-2362-A2011/2021	EPI_ISL_5822562	2021-05-23	Instiuto Nacional de Saude, Mozambique	Forschungszentrum Borstel	Upatel et al
326	hCoV-19/Mozambique/COV-2084-A1707/2021	EPI_ISL_5822570	2021-06-21	Instiuto Nacional de Saude, Mozambique	Forschungszentrum Borstel	Upatel et al
327	hCoV-19/Mozambique/COV-2089-A1712/2021	EPI_ISL_5822573	2021-06-21	Instiuto Nacional de Saude, Mozambique	Forschungszentrum Borstel	Upatel et al
328	hCoV-19/Mozambique/COV-2095-A1718/2021	EPI_ISL_5822578	2021-06-21	Instiuto Nacional de Saude, Mozambique	Forschungszentrum Borstel	Upatel et al
329	hCoV-19/Mozambique/COV-2169-A1816/2021	EPI_ISL_5822593	2021-06-16	Instiuto Nacional de Saude, Mozambique	Forschungszentrum Borstel	Upatel et al
330	hCoV-19/Mozambique/COV-2190-A1837/2021	EPI_ISL_5822600	2021-06-18	Instiuto Nacional de Saude, Mozambique	Forschungszentrum Borstel	Upatel et al
331	hCoV-19/Mozambique/COV-2229-A1877/2021	EPI_ISL_5822622	2021-06-21	Instiuto Nacional de Saude, Mozambique	Forschungszentrum Borstel	Upatel et al
332	hCoV-19/Mozambique/INS-K008140/2021	EPI_ISL_964918	2021-01-14	Instituto Nacional de Saude (INS)	KRISP, KZN Research Innovation and Sequencing Platform	Ismael et al
333	hCoV-19/Mozambique/INS-K008138/2021	EPI_ISL_964919	2021-01-15	Instituto Nacional de Saude (INS)	KRISP, KZN Research Innovation and Sequencing Platform	Ismael et al
334	hCoV-19/Mozambique/INS-K008134/2021	EPI_ISL_964920	2021-01-16	Instituto Nacional de Saude (INS)	KRISP, KZN Research Innovation and Sequencing Platform	Ismael et al
335	hCoV-19/Mozambique/INS-K008149/2021	EPI_ISL_964921	2021-01-14	Instituto Nacional de Saude (INS)	KRISP, KZN Research Innovation and Sequencing Platform	Ismael et al
336	hCoV-19/Mozambique/INS-K008131/2021	EPI_ISL_964922	2021-01-16	Instituto Nacional de Saude (INS)	KRISP, KZN Research Innovation and Sequencing Platform	Ismael et al
337	hCoV-19/Mozambique/INS-K008150/2021	EPI_ISL_964923	2021-01-15	Instituto Nacional de Saude (INS)	KRISP, KZN Research Innovation and Sequencing Platform	Ismael et al
338	hCoV-19/Mozambique/INS-K008126/2021	EPI_ISL_964924	2021-01-08	Instituto Nacional de Saude (INS)	KRISP, KZN Research Innovation and Sequencing Platform	Ismael et al
339	hCoV-19/Mozambique/INS-K008147/2021	EPI_ISL_964925	2021-01-16	Instituto Nacional de Saude (INS)	KRISP, KZN Research Innovation and Sequencing Platform	Ismael et al
340	hCoV-19/Mozambique/INS-K008160/2021	EPI_ISL_964926	2021-01-15	Instituto Nacional de Saude (INS)	KRISP, KZN Research Innovation and Sequencing Platform	Ismael et al
341	hCoV-19/Mozambique/INS-K008166/2021	EPI_ISL_964927	2021-01-17	Instituto Nacional de Saude (INS)	KRISP, KZN Research Innovation and Sequencing Platform	Ismael et al
342	hCoV-19/Mozambique/INS-K008171/2021	EPI_ISL_964928	2021-01-16	Instituto Nacional de Saude (INS)	KRISP, KZN Research Innovation and Sequencing Platform	Ismael et al
343	hCoV-19/Mozambique/INS-K008143/2021	EPI_ISL_964929	2021-01-15	Instituto Nacional de Saude (INS)	KRISP, KZN Research Innovation and Sequencing Platform	Ismael et al
344	hCoV-19/Mozambique/INS-K008145/2021	EPI_ISL_964930	2021-01-15	Instituto Nacional de Saude (INS)	KRISP, KZN Research Innovation and Sequencing Platform	Ismael et al
345	hCoV-19/Mozambique/INS-K008154/2021	EPI_ISL_964932	2021-01-14	Instituto Nacional de Saude (INS)	KRISP, KZN Research Innovation and Sequencing Platform	Ismael et al
346	hCoV-19/Mozambique/INS-K008173/2021	EPI_ISL_964942	2021-01-16	Instituto Nacional de Saude (INS)	KRISP, KZN Research Innovation and Sequencing Platform	Ismael et al
347	hCoV-19/Mozambique/INS-K008137/2021	EPI_ISL_964945	2021-01-15	Instituto Nacional de Saude (INS)	KRISP, KZN Research Innovation and Sequencing Platform	Ismael et al
348	hCoV-19/Mozambique/INS-K008128/2021	EPI_ISL_964934	2021-01-16	Instituto Nacional de Saude (INS)	KRISP, KZN Research Innovation and Sequencing Platform	Ismael et al
349	hCoV-19/Mozambique/INS-K008133/2021	EPI_ISL_964937	2021-01-16	Instituto Nacional de Saude (INS)	KRISP, KZN Research Innovation and Sequencing Platform	Ismael et al
350	hCoV-19/Mozambique/INS-K008161/2021	EPI_ISL_964938	2021-01-22	Instituto Nacional de Saude (INS)	KRISP, KZN Research Innovation and Sequencing Platform	Ismael et al
351	hCoV-19/Mozambique/INS-K008146/2021	EPI_ISL_964931	2021-01-15	Instituto Nacional de Saude (INS)	KRISP, KZN Research Innovation and Sequencing Platform	Ismael et al
352	hCoV-19/Mozambique/INS-K008130/2021	EPI_ISL_964935	2021-01-16	Instituto Nacional de Saude (INS)	KRISP, KZN Research Innovation and Sequencing Platform	Ismael et al
353	hCoV-19/Mozambique/INS-K008162/2021	EPI_ISL_964939	2021-01-15	Instituto Nacional de Saude (INS)	KRISP, KZN Research Innovation and Sequencing Platform	Ismael et al
354	hCoV-19/Mozambique/INS-K008142/2021	EPI_ISL_964946	2021-01-15	Instituto Nacional de Saude (INS)	KRISP, KZN Research Innovation and Sequencing Platform	Ismael et al
355	hCoV-19/Mozambique/INS-K008157/2021	EPI_ISL_964933	2021-01-14	Instituto Nacional de Saude (INS)	KRISP, KZN Research Innovation and Sequencing Platform	Ismael et al
356	hCoV-19/Mozambique/INS-K008132/2021	EPI_ISL_964936	2021-01-16	Instituto Nacional de Saude (INS)	KRISP, KZN Research Innovation and Sequencing Platform	Ismael et al
357	hCoV-19/Mozambique/INS-K008170/2021	EPI_ISL_964941	2021-01-14	Instituto Nacional de Saude (INS)	KRISP, KZN Research Innovation and Sequencing Platform	Ismael et al
358	hCoV-19/Mozambique/INS-K008163/2021	EPI_ISL_964940	2021-01-14	Instituto Nacional de Saude (INS)	KRISP, KZN Research Innovation and Sequencing Platform	Ismael et al
359	hCoV-19/Mozambique/INS-K008167/2021	EPI_ISL_964948	2021-01-22	Instituto Nacional de Saude (INS)	KRISP, KZN Research Innovation and Sequencing Platform	Ismael et al
360	hCoV-19/Mozambique/INS-K008135/2021	EPI_ISL_964943	2021-01-15	Instituto Nacional de Saude (INS)	KRISP, KZN Research Innovation and Sequencing Platform	Ismael et al
361	hCoV-19/Mozambique/INS-K008144/2021	EPI_ISL_964947	2021-01-15	Instituto Nacional de Saude (INS)	KRISP, KZN Research Innovation and Sequencing Platform	Ismael et al
362	hCoV-19/Mozambique/CERI-KRISP-K015078/2021	EPI_ISL_2617093	2021-03-18	Instituto Nacional de Saude (INS)	CERI, Centre for Epidemic Response and Innvoation, Stellenbosch University and KRISP, KZN Research Innovation and Sequencing Platform, UKZN.	Ismael et al
363	hCoV-19/Mozambique/CERI-KRISP-K015000/2021	EPI_ISL_2492815	2021-03-07	Instituto Nacional de Saude (INS)	CERI, Centre for Epidemic Response and Innvoation, Stellenbosch University and KRISP, KZN Research Innovation and Sequencing Platform, UKZN.	Ismael et al
364	hCoV-19/Mozambique/CERI-KRISP-K014987/2021	EPI_ISL_2492937	2021-03-01	Instituto Nacional de Saude (INS)	CERI, Centre for Epidemic Response and Innvoation, Stellenbosch University and KRISP, KZN Research Innovation and Sequencing Platform, UKZN.	Ismael et al
365	hCoV-19/Mozambique/CERI-KRISP-K014990/2021	EPI_ISL_2492957	2021-03-05	Instituto Nacional de Saude (INS)	CERI, Centre for Epidemic Response and Innvoation, Stellenbosch University and KRISP, KZN Research Innovation and Sequencing Platform, UKZN.	Ismael et al
366	hCoV-19/Mozambique/CERI-KRISP-K014995/2021	EPI_ISL_2492976	2021-03-05	Instituto Nacional de Saude (INS)	CERI, Centre for Epidemic Response and Innvoation, Stellenbosch University and KRISP, KZN Research Innovation and Sequencing Platform, UKZN.	Ismael et al
367	hCoV-19/Mozambique/CERI-KRISP-K014999/2021	EPI_ISL_2492988	2021-03-07	Instituto Nacional de Saude (INS)	CERI, Centre for Epidemic Response and Innvoation, Stellenbosch University and KRISP, KZN Research Innovation and Sequencing Platform, UKZN.	Ismael et al
368	hCoV-19/Mozambique/CERI-KRISP-K027972/2021	EPI_ISL_7417340	2021-09-25	Instituto Nacional de Saude (INS)	CERI, Centre for Epidemic Response and Innvoation, Stellenbosch University and KRISP, KZN Research Innovation and Sequencing Platform, UKZN.	Ismael et al
369	hCoV-19/Mozambique/CERI-KRISP-K027963/2021	EPI_ISL_7417415	2021-09-08	Instituto Nacional de Saude (INS)	CERI, Centre for Epidemic Response and Innvoation, Stellenbosch University and KRISP, KZN Research Innovation and Sequencing Platform, UKZN.	Ismael et al
370	hCoV-19/Mozambique/CERI-KRISP-K027991/2021	EPI_ISL_7417429	2021-09-14	Instituto Nacional de Saude (INS)	CERI, Centre for Epidemic Response and Innvoation, Stellenbosch University and KRISP, KZN Research Innovation and Sequencing Platform, UKZN.	Ismael et al
371	hCoV-19/Mozambique/CERI-KRISP-K027971/2021	EPI_ISL_7417145	2021-09-25	Instituto Nacional de Saude (INS)	CERI, Centre for Epidemic Response and Innvoation, Stellenbosch University and KRISP, KZN Research Innovation and Sequencing Platform, UKZN.	Ismael et al
372	hCoV-19/Mozambique/CERI-KRISP-K027993/2021	EPI_ISL_7417243	2021-09-13	Instituto Nacional de Saude (INS)	CERI, Centre for Epidemic Response and Innvoation, Stellenbosch University and KRISP, KZN Research Innovation and Sequencing Platform, UKZN.	Ismael et al
373	hCoV-19/Mozambique/CERI-KRISP-K027960/2021	EPI_ISL_7417021	2021-09-08	Instituto Nacional de Saude (INS)	CERI, Centre for Epidemic Response and Innvoation, Stellenbosch University and KRISP, KZN Research Innovation and Sequencing Platform, UKZN.	Ismael et al
374	hCoV-19/Mozambique/CERI-KRISP-K027964/2021	EPI_ISL_7417032	2021-09-08	Instituto Nacional de Saude (INS)	CERI, Centre for Epidemic Response and Innvoation, Stellenbosch University and KRISP, KZN Research Innovation and Sequencing Platform, UKZN.	Ismael et al
375	hCoV-19/Mozambique/CERI-KRISP-K027970/2021	EPI_ISL_7417303	2021-09-24	Instituto Nacional de Saude (INS)	CERI, Centre for Epidemic Response and Innvoation, Stellenbosch University and KRISP, KZN Research Innovation and Sequencing Platform, UKZN.	Ismael et al
376	hCoV-19/Mozambique/CERI-KRISP-K027983/2021	EPI_ISL_7417061	2021-09-03	Instituto Nacional de Saude (INS)	CERI, Centre for Epidemic Response and Innvoation, Stellenbosch University and KRISP, KZN Research Innovation and Sequencing Platform, UKZN.	Ismael et al
377	hCoV-19/Mozambique/CERI-KRISP-K027973/2021	EPI_ISL_7417188	2021-09-08	Instituto Nacional de Saude (INS)	CERI, Centre for Epidemic Response and Innvoation, Stellenbosch University and KRISP, KZN Research Innovation and Sequencing Platform, UKZN.	Ismael et al
378	hCoV-19/Mozambique/CERI-KRISP-K027961/2021	EPI_ISL_7417274	2021-09-09	Instituto Nacional de Saude (INS)	CERI, Centre for Epidemic Response and Innvoation, Stellenbosch University and KRISP, KZN Research Innovation and Sequencing Platform, UKZN.	Ismael et al
379	hCoV-19/Mozambique/CERI-KRISP-K027969/2021	EPI_ISL_7417295	2021-09-25	Instituto Nacional de Saude (INS)	CERI, Centre for Epidemic Response and Innvoation, Stellenbosch University and KRISP, KZN Research Innovation and Sequencing Platform, UKZN.	Ismael et al
380	hCoV-19/Mozambique/CERI-KRISP-K027980/2021	EPI_ISL_7417457	2021-09-02	Instituto Nacional de Saude (INS)	CERI, Centre for Epidemic Response and Innvoation, Stellenbosch University and KRISP, KZN Research Innovation and Sequencing Platform, UKZN.	Ismael et al
381	hCoV-19/Mozambique/CERI-KRISP-K027990/2021	EPI_ISL_7417073	2021-09-13	Instituto Nacional de Saude (INS)	CERI, Centre for Epidemic Response and Innvoation, Stellenbosch University and KRISP, KZN Research Innovation and Sequencing Platform, UKZN.	Ismael et al
382	hCoV-19/Mozambique/CERI-KRISP-K027996/2021	EPI_ISL_7417402	2021-10-06	Instituto Nacional de Saude (INS)	CERI, Centre for Epidemic Response and Innvoation, Stellenbosch University and KRISP, KZN Research Innovation and Sequencing Platform, UKZN.	Ismael et al
383	hCoV-19/Mozambique/CERI-KRISP-K027968/2021	EPI_ISL_7417044	2021-09-27	Instituto Nacional de Saude (INS)	CERI, Centre for Epidemic Response and Innvoation, Stellenbosch University and KRISP, KZN Research Innovation and Sequencing Platform, UKZN.	Ismael et al
384	hCoV-19/Mozambique/CERI-KRISP-K027987/2021	EPI_ISL_7417442	2021-09-15	Instituto Nacional de Saude (INS)	CERI, Centre for Epidemic Response and Innvoation, Stellenbosch University and KRISP, KZN Research Innovation and Sequencing Platform, UKZN.	Ismael et al
385	hCoV-19/Mozambique/CERI-KRISP-K027979/2021	EPI_ISL_7417051	2021-09-08	Instituto Nacional de Saude (INS)	CERI, Centre for Epidemic Response and Innvoation, Stellenbosch University and KRISP, KZN Research Innovation and Sequencing Platform, UKZN.	Ismael et al
386	hCoV-19/Mozambique/CERI-KRISP-K027988/2021	EPI_ISL_7417314	2021-09-13	Instituto Nacional de Saude (INS)	CERI, Centre for Epidemic Response and Innvoation, Stellenbosch University and KRISP, KZN Research Innovation and Sequencing Platform, UKZN.	Ismael et al
387	hCoV-19/Mozambique/CERI-KRISP-K027962/2021	EPI_ISL_7417328	2021-09-09	Instituto Nacional de Saude (INS)	CERI, Centre for Epidemic Response and Innvoation, Stellenbosch University and KRISP, KZN Research Innovation and Sequencing Platform, UKZN.	Ismael et al
388	hCoV-19/Mozambique/CERI-KRISP-K027981/2021	EPI_ISL_7417365	2021-09-03	Instituto Nacional de Saude (INS)	CERI, Centre for Epidemic Response and Innvoation, Stellenbosch University and KRISP, KZN Research Innovation and Sequencing Platform, UKZN.	Ismael et al
389	hCoV-19/Mozambique/MZ-L-IBV-97025281/2021	EPI_ISL_2442087	2021-03-03	CISM & ISGlobal, Institut de Salut Global de Barcelona	Instituto de Biomedicina de Valencia - CSIC	Mayor et al
390	hCoV-19/Mozambique/MZ-L-IBV-97025303/2021	EPI_ISL_2442093	2021-02-17	CISM & ISGlobal, Institut de Salut Global de Barcelona	Instituto de Biomedicina de Valencia - CSIC	Mayor et al
391	hCoV-19/Mozambique/MZ-L-IBV-97025304/2021	EPI_ISL_2442094	2021-02-19	CISM & ISGlobal, Institut de Salut Global de Barcelona	Instituto de Biomedicina de Valencia - CSIC	Mayor et al
392	hCoV-19/Mozambique/MZ-L-IBV-97025305/2021	EPI_ISL_2442095	2021-02-17	CISM & ISGlobal, Institut de Salut Global de Barcelona	Instituto de Biomedicina de Valencia - CSIC	Mayor et al
393	hCoV-19/Mozambique/MZ-L-IBV-97025386/2021	EPI_ISL_2442138	2021-01-24	CISM & ISGlobal, Institut de Salut Global de Barcelona	Instituto de Biomedicina de Valencia - CSIC	Mayor et al
394	hCoV-19/Mozambique/MZ-L-IBV-97025405/2021	EPI_ISL_2442152	2021-01-05	CISM & ISGlobal, Institut de Salut Global de Barcelona	Instituto de Biomedicina de Valencia - CSIC	Mayor et al
395	hCoV-19/Mozambique/MZ-L-IBV-97025425/2021	EPI_ISL_2442171	2021-01-19	CISM & ISGlobal, Institut de Salut Global de Barcelona	Instituto de Biomedicina de Valencia - CSIC	Mayor et al
396	hCoV-19/Mozambique/MZ-L-IBV-97025426/2021	EPI_ISL_2442172	2021-01-05	CISM & ISGlobal, Institut de Salut Global de Barcelona	Instituto de Biomedicina de Valencia - CSIC	Mayor et al
397	hCoV-19/Mozambique/MZ-L-IBV-97025407/2021	EPI_ISL_2442154	2021-01-05	CISM & ISGlobal, Institut de Salut Global de Barcelona	Instituto de Biomedicina de Valencia - CSIC	Mayor et al
398	hCoV-19/Mozambique/MZ-L-IBV-97025409/2021	EPI_ISL_2442155	2021-01-13	CISM & ISGlobal, Institut de Salut Global de Barcelona	Instituto de Biomedicina de Valencia - CSIC	Mayor et al
399	hCoV-19/Mozambique/CERI-KRISP-K016074/2021	EPI_ISL_3447974	2021-04-20	Instituto Nacional de Saude (INS)	CERI, Centre for Epidemic Response and Innvoation, Stellenbosch University and KRISP, KZN Research Innovation and Sequencing Platform, UKZN.	Ismael et al
400	hCoV-19/Mozambique/CERI-KRISP-K015999/2021	EPI_ISL_3447975	2021-03-31	Instituto Nacional de Saude (INS)	CERI, Centre for Epidemic Response and Innvoation, Stellenbosch University and KRISP, KZN Research Innovation and Sequencing Platform, UKZN.	Ismael et al
401	hCoV-19/Mozambique/CERI-KRISP-K015998/2021	EPI_ISL_3447976	2021-03-31	Instituto Nacional de Saude (INS)	CERI, Centre for Epidemic Response and Innvoation, Stellenbosch University and KRISP, KZN Research Innovation and Sequencing Platform, UKZN.	Ismael et al
402	hCoV-19/Mozambique/CERI-KRISP-K016082/2021	EPI_ISL_3447977	2021-04-20	Instituto Nacional de Saude (INS)	CERI, Centre for Epidemic Response and Innvoation, Stellenbosch University and KRISP, KZN Research Innovation and Sequencing Platform, UKZN.	Ismael et al
403	hCoV-19/Mozambique/CERI-KRISP-K016070/2021	EPI_ISL_3447978	2021-04-20	Instituto Nacional de Saude (INS)	CERI, Centre for Epidemic Response and Innvoation, Stellenbosch University and KRISP, KZN Research Innovation and Sequencing Platform, UKZN.	Ismael et al
404	hCoV-19/Mozambique/CERI-KRISP-K016059/2021	EPI_ISL_3447979	2021-04-19	Instituto Nacional de Saude (INS)	CERI, Centre for Epidemic Response and Innvoation, Stellenbosch University and KRISP, KZN Research Innovation and Sequencing Platform, UKZN.	Ismael et al
405	hCoV-19/Mozambique/CERI-KRISP-K016015/2021	EPI_ISL_3447980	2021-04-01	Instituto Nacional de Saude (INS)	CERI, Centre for Epidemic Response and Innvoation, Stellenbosch University and KRISP, KZN Research Innovation and Sequencing Platform, UKZN.	Ismael et al
406	hCoV-19/Mozambique/CERI-KRISP-K016046/2021	EPI_ISL_3447981	2021-04-14	Instituto Nacional de Saude (INS)	CERI, Centre for Epidemic Response and Innvoation, Stellenbosch University and KRISP, KZN Research Innovation and Sequencing Platform, UKZN.	Ismael et al
407	hCoV-19/Mozambique/CERI-KRISP-K016053/2021	EPI_ISL_3447982	2021-04-16	Instituto Nacional de Saude (INS)	CERI, Centre for Epidemic Response and Innvoation, Stellenbosch University and KRISP, KZN Research Innovation and Sequencing Platform, UKZN.	Ismael et al
408	hCoV-19/Mozambique/CERI-KRISP-K016077/2021	EPI_ISL_3447983	2021-04-20	Instituto Nacional de Saude (INS)	CERI, Centre for Epidemic Response and Innvoation, Stellenbosch University and KRISP, KZN Research Innovation and Sequencing Platform, UKZN.	Ismael et al
409	hCoV-19/Mozambique/CERI-KRISP-K016056/2021	EPI_ISL_3447984	2021-04-13	Instituto Nacional de Saude (INS)	CERI, Centre for Epidemic Response and Innvoation, Stellenbosch University and KRISP, KZN Research Innovation and Sequencing Platform, UKZN.	Ismael et al
410	hCoV-19/Mozambique/CERI-KRISP-K016054/2021	EPI_ISL_3447985	2021-04-18	Instituto Nacional de Saude (INS)	CERI, Centre for Epidemic Response and Innvoation, Stellenbosch University and KRISP, KZN Research Innovation and Sequencing Platform, UKZN.	Ismael et al
411	hCoV-19/Mozambique/CERI-KRISP-K016047/2021	EPI_ISL_3447986	2021-04-16	Instituto Nacional de Saude (INS)	CERI, Centre for Epidemic Response and Innvoation, Stellenbosch University and KRISP, KZN Research Innovation and Sequencing Platform, UKZN.	Ismael et al
412	hCoV-19/Mozambique/CERI-KRISP-K016071/2021	EPI_ISL_3447987	2021-04-20	Instituto Nacional de Saude (INS)	CERI, Centre for Epidemic Response and Innvoation, Stellenbosch University and KRISP, KZN Research Innovation and Sequencing Platform, UKZN.	Ismael et al
413	hCoV-19/Mozambique/CERI-KRISP-K016000/2021	EPI_ISL_3447988	2021-04-02	Instituto Nacional de Saude (INS)	CERI, Centre for Epidemic Response and Innvoation, Stellenbosch University and KRISP, KZN Research Innovation and Sequencing Platform, UKZN.	Ismael et al
414	hCoV-19/Mozambique/CERI-KRISP-K016003/2021	EPI_ISL_3447989	2021-03-30	Instituto Nacional de Saude (INS)	CERI, Centre for Epidemic Response and Innvoation, Stellenbosch University and KRISP, KZN Research Innovation and Sequencing Platform, UKZN.	Ismael et al
415	hCoV-19/Mozambique/CERI-KRISP-K016042/2021	EPI_ISL_3447990	2021-04-13	Instituto Nacional de Saude (INS)	CERI, Centre for Epidemic Response and Innvoation, Stellenbosch University and KRISP, KZN Research Innovation and Sequencing Platform, UKZN.	Ismael et al
416	hCoV-19/Mozambique/CERI-KRISP-K016085/2021	EPI_ISL_3447991	2021-04-20	Instituto Nacional de Saude (INS)	CERI, Centre for Epidemic Response and Innvoation, Stellenbosch University and KRISP, KZN Research Innovation and Sequencing Platform, UKZN.	Ismael et al
417	hCoV-19/Mozambique/CERI-KRISP-K016001/2021	EPI_ISL_3447993	2021-03-30	Instituto Nacional de Saude (INS)	CERI, Centre for Epidemic Response and Innvoation, Stellenbosch University and KRISP, KZN Research Innovation and Sequencing Platform, UKZN.	Ismael et al
418	hCoV-19/Mozambique/CERI-KRISP-K016005/2021	EPI_ISL_3447994	2021-03-25	Instituto Nacional de Saude (INS)	CERI, Centre for Epidemic Response and Innvoation, Stellenbosch University and KRISP, KZN Research Innovation and Sequencing Platform, UKZN.	Ismael et al
419	hCoV-19/Mozambique/CERI-KRISP-K016006/2021	EPI_ISL_3447995	2021-03-31	Instituto Nacional de Saude (INS)	CERI, Centre for Epidemic Response and Innvoation, Stellenbosch University and KRISP, KZN Research Innovation and Sequencing Platform, UKZN.	Ismael et al
420	hCoV-19/Mozambique/CERI-KRISP-K016058/2021	EPI_ISL_3447997	2021-04-16	Instituto Nacional de Saude (INS)	CERI, Centre for Epidemic Response and Innvoation, Stellenbosch University and KRISP, KZN Research Innovation and Sequencing Platform, UKZN.	Ismael et al
421	hCoV-19/Mozambique/CERI-KRISP-K016068/2021	EPI_ISL_3447998	2021-04-20	Instituto Nacional de Saude (INS)	CERI, Centre for Epidemic Response and Innvoation, Stellenbosch University and KRISP, KZN Research Innovation and Sequencing Platform, UKZN.	Ismael et al
422	hCoV-19/Mozambique/CERI-KRISP-K025853/2021	EPI_ISL_5425648	2021-05-07	Instituto Nacional de Saude (INS)	CERI, Centre for Epidemic Response and Innvoation, Stellenbosch University and KRISP, KZN Research Innovation and Sequencing Platform, UKZN.	Ismael et al
423	hCoV-19/Mozambique/CERI-KRISP-K025858/2021	EPI_ISL_5425649	2021-07-07	Instituto Nacional de Saude (INS)	CERI, Centre for Epidemic Response and Innvoation, Stellenbosch University and KRISP, KZN Research Innovation and Sequencing Platform, UKZN.	Ismael et al
424	hCoV-19/Mozambique/CERI-KRISP-K025916/2021	EPI_ISL_5425650	2021-06-28	Instituto Nacional de Saude (INS)	CERI, Centre for Epidemic Response and Innvoation, Stellenbosch University and KRISP, KZN Research Innovation and Sequencing Platform, UKZN.	Ismael et al
425	hCoV-19/Mozambique/CERI-KRISP-K025924/2021	EPI_ISL_5425651	2021-07-01	Instituto Nacional de Saude (INS)	CERI, Centre for Epidemic Response and Innvoation, Stellenbosch University and KRISP, KZN Research Innovation and Sequencing Platform, UKZN.	Ismael et al
426	hCoV-19/Mozambique/CERI-KRISP-K025909/2021	EPI_ISL_5425658	2021-07-02	Instituto Nacional de Saude (INS)	CERI, Centre for Epidemic Response and Innvoation, Stellenbosch University and KRISP, KZN Research Innovation and Sequencing Platform, UKZN.	Ismael et al
427	hCoV-19/Mozambique/CERI-KRISP-K025844/2021	EPI_ISL_5425637	2021-07-07	Instituto Nacional de Saude (INS)	CERI, Centre for Epidemic Response and Innvoation, Stellenbosch University and KRISP, KZN Research Innovation and Sequencing Platform, UKZN.	Ismael et al
428	hCoV-19/Mozambique/CERI-KRISP-K025911/2021	EPI_ISL_5425638	2021-07-01	Instituto Nacional de Saude (INS)	CERI, Centre for Epidemic Response and Innvoation, Stellenbosch University and KRISP, KZN Research Innovation and Sequencing Platform, UKZN.	Ismael et al
429	hCoV-19/Mozambique/CERI-KRISP-K025912/2021	EPI_ISL_5425639	2021-06-25	Instituto Nacional de Saude (INS)	CERI, Centre for Epidemic Response and Innvoation, Stellenbosch University and KRISP, KZN Research Innovation and Sequencing Platform, UKZN.	Ismael et al
430	hCoV-19/Mozambique/CERI-KRISP-K025914/2021	EPI_ISL_5425640	2021-06-28	Instituto Nacional de Saude (INS)	CERI, Centre for Epidemic Response and Innvoation, Stellenbosch University and KRISP, KZN Research Innovation and Sequencing Platform, UKZN.	Ismael et al
431	hCoV-19/Mozambique/CERI-KRISP-K025926/2021	EPI_ISL_5425641	2021-07-05	Instituto Nacional de Saude (INS)	CERI, Centre for Epidemic Response and Innvoation, Stellenbosch University and KRISP, KZN Research Innovation and Sequencing Platform, UKZN.	Ismael et al
432	hCoV-19/Mozambique/CERI-KRISP-K025904/2021	EPI_ISL_5425670	2021-07-02	Instituto Nacional de Saude (INS)	CERI, Centre for Epidemic Response and Innvoation, Stellenbosch University and KRISP, KZN Research Innovation and Sequencing Platform, UKZN.	Ismael et al
433	hCoV-19/Mozambique/CERI-KRISP-K025861/2021	EPI_ISL_5425680	2021-08-07	Instituto Nacional de Saude (INS)	CERI, Centre for Epidemic Response and Innvoation, Stellenbosch University and KRISP, KZN Research Innovation and Sequencing Platform, UKZN.	Ismael et al
434	hCoV-19/Mozambique/CERI-KRISP-K025860/2021	EPI_ISL_5425687	2021-08-07	Instituto Nacional de Saude (INS)	CERI, Centre for Epidemic Response and Innvoation, Stellenbosch University and KRISP, KZN Research Innovation and Sequencing Platform, UKZN.	Ismael et al
435	hCoV-19/Mozambique/CERI-KRISP-K025933/2021	EPI_ISL_5425693	2021-06-25	Instituto Nacional de Saude (INS)	CERI, Centre for Epidemic Response and Innvoation, Stellenbosch University and KRISP, KZN Research Innovation and Sequencing Platform, UKZN.	Ismael et al
436	hCoV-19/Mozambique/CERI-KRISP-K025875/2021	EPI_ISL_5425701	2021-07-08	Instituto Nacional de Saude (INS)	CERI, Centre for Epidemic Response and Innvoation, Stellenbosch University and KRISP, KZN Research Innovation and Sequencing Platform, UKZN.	Ismael et al
437	hCoV-19/Mozambique/CERI-KRISP-K025920/2021	EPI_ISL_5425710	2021-07-02	Instituto Nacional de Saude (INS)	CERI, Centre for Epidemic Response and Innvoation, Stellenbosch University and KRISP, KZN Research Innovation and Sequencing Platform, UKZN.	Ismael et al
438	hCoV-19/Mozambique/CERI-KRISP-K025905/2021	EPI_ISL_5425714	2021-07-06	Instituto Nacional de Saude (INS)	CERI, Centre for Epidemic Response and Innvoation, Stellenbosch University and KRISP, KZN Research Innovation and Sequencing Platform, UKZN.	Ismael et al
439	hCoV-19/Mozambique/CERI-KRISP-K025896/2021	EPI_ISL_5425718	2021-07-09	Instituto Nacional de Saude (INS)	CERI, Centre for Epidemic Response and Innvoation, Stellenbosch University and KRISP, KZN Research Innovation and Sequencing Platform, UKZN.	Ismael et al
440	hCoV-19/Mozambique/CERI-KRISP-K025915/2021	EPI_ISL_5425719	2021-06-28	Instituto Nacional de Saude (INS)	CERI, Centre for Epidemic Response and Innvoation, Stellenbosch University and KRISP, KZN Research Innovation and Sequencing Platform, UKZN.	Ismael et al
441	hCoV-19/Mozambique/CERI-KRISP-K025879/2021	EPI_ISL_5425720	2021-07-08	Instituto Nacional de Saude (INS)	CERI, Centre for Epidemic Response and Innvoation, Stellenbosch University and KRISP, KZN Research Innovation and Sequencing Platform, UKZN.	Ismael et al
442	hCoV-19/Mozambique/CERI-KRISP-K025927/2021	EPI_ISL_5425721	2021-06-30	Instituto Nacional de Saude (INS)	CERI, Centre for Epidemic Response and Innvoation, Stellenbosch University and KRISP, KZN Research Innovation and Sequencing Platform, UKZN.	Ismael et al
443	hCoV-19/Mozambique/CERI-KRISP-K025929/2021	EPI_ISL_5425722	2021-06-29	Instituto Nacional de Saude (INS)	CERI, Centre for Epidemic Response and Innvoation, Stellenbosch University and KRISP, KZN Research Innovation and Sequencing Platform, UKZN.	Ismael et al
444	hCoV-19/Mozambique/CERI-KRISP-K025922/2021	EPI_ISL_5425723	2021-06-30	Instituto Nacional de Saude (INS)	CERI, Centre for Epidemic Response and Innvoation, Stellenbosch University and KRISP, KZN Research Innovation and Sequencing Platform, UKZN.	Ismael et al
445	hCoV-19/Mozambique/CERI-KRISP-K025850/2021	EPI_ISL_5425724	2021-07-07	Instituto Nacional de Saude (INS)	CERI, Centre for Epidemic Response and Innvoation, Stellenbosch University and KRISP, KZN Research Innovation and Sequencing Platform, UKZN.	Ismael et al
446	hCoV-19/Mozambique/CERI-KRISP-K025848/2021	EPI_ISL_5425725	2021-07-07	Instituto Nacional de Saude (INS)	CERI, Centre for Epidemic Response and Innvoation, Stellenbosch University and KRISP, KZN Research Innovation and Sequencing Platform, UKZN.	Ismael et al
447	hCoV-19/Mozambique/CERI-KRISP-K025874/2021	EPI_ISL_5425726	2021-07-10	Instituto Nacional de Saude (INS)	CERI, Centre for Epidemic Response and Innvoation, Stellenbosch University and KRISP, KZN Research Innovation and Sequencing Platform, UKZN.	Ismael et al
448	hCoV-19/Mozambique/CERI-KRISP-K025862/2021	EPI_ISL_5425734	2021-08-07	Instituto Nacional de Saude (INS)	CERI, Centre for Epidemic Response and Innvoation, Stellenbosch University and KRISP, KZN Research Innovation and Sequencing Platform, UKZN.	Ismael et al
449	hCoV-19/Mozambique/CERI-KRISP-K025890/2021	EPI_ISL_5425735	2021-07-06	Instituto Nacional de Saude (INS)	CERI, Centre for Epidemic Response and Innvoation, Stellenbosch University and KRISP, KZN Research Innovation and Sequencing Platform, UKZN.	Ismael et al
450	hCoV-19/Mozambique/CERI-KRISP-K018287/2021	EPI_ISL_2688576	2021-04-20	Instituto Nacional de Saude (INS)	CERI, Centre for Epidemic Response and Innvoation, Stellenbosch University and KRISP, KZN Research Innovation and Sequencing Platform, UKZN.	Ismael et al
451	hCoV-19/Mozambique/CERI-KRISP-K018290/2021	EPI_ISL_2688577	2021-04-21	Instituto Nacional de Saude (INS)	CERI, Centre for Epidemic Response and Innvoation, Stellenbosch University and KRISP, KZN Research Innovation and Sequencing Platform, UKZN.	Ismael et al
452	hCoV-19/Mozambique/CERI-KRISP-K018292/2021	EPI_ISL_2688578	2021-04-22	Instituto Nacional de Saude (INS)	CERI, Centre for Epidemic Response and Innvoation, Stellenbosch University and KRISP, KZN Research Innovation and Sequencing Platform, UKZN.	Ismael et al
453	hCoV-19/Mozambique/CERI-KRISP-K025868/2021	EPI_ISL_5425736	2021-07-10	Instituto Nacional de Saude (INS)	CERI, Centre for Epidemic Response and Innvoation, Stellenbosch University and KRISP, KZN Research Innovation and Sequencing Platform, UKZN.	Ismael et al
454	hCoV-19/Mozambique/CERI-KRISP-K025934/2021	EPI_ISL_5425737	2021-07-10	Instituto Nacional de Saude (INS)	CERI, Centre for Epidemic Response and Innvoation, Stellenbosch University and KRISP, KZN Research Innovation and Sequencing Platform, UKZN.	Ismael et al
455	hCoV-19/Mozambique/CERI-KRISP-K025863/2021	EPI_ISL_5425738	2021-08-07	Instituto Nacional de Saude (INS)	CERI, Centre for Epidemic Response and Innvoation, Stellenbosch University and KRISP, KZN Research Innovation and Sequencing Platform, UKZN.	Ismael et al
456	hCoV-19/Mozambique/CERI-KRISP-K025859/2021	EPI_ISL_5425739	2021-07-07	Instituto Nacional de Saude (INS)	CERI, Centre for Epidemic Response and Innvoation, Stellenbosch University and KRISP, KZN Research Innovation and Sequencing Platform, UKZN.	Ismael et al
457	hCoV-19/Mozambique/CERI-KRISP-K025917/2021	EPI_ISL_5425740	2021-06-28	Instituto Nacional de Saude (INS)	CERI, Centre for Epidemic Response and Innvoation, Stellenbosch University and KRISP, KZN Research Innovation and Sequencing Platform, UKZN.	Ismael et al
458	hCoV-19/Mozambique/CERI-KRISP-K025938/2021	EPI_ISL_5425741	2021-06-28	Instituto Nacional de Saude (INS)	CERI, Centre for Epidemic Response and Innvoation, Stellenbosch University and KRISP, KZN Research Innovation and Sequencing Platform, UKZN.	Ismael et al
459	hCoV-19/Mozambique/CERI-KRISP-K025884/2021	EPI_ISL_5425742	2021-07-08	Instituto Nacional de Saude (INS)	CERI, Centre for Epidemic Response and Innvoation, Stellenbosch University and KRISP, KZN Research Innovation and Sequencing Platform, UKZN.	Ismael et al
460	hCoV-19/Mozambique/CERI-KRISP-K025931/2021	EPI_ISL_5425743	2021-07-02	Instituto Nacional de Saude (INS)	CERI, Centre for Epidemic Response and Innvoation, Stellenbosch University and KRISP, KZN Research Innovation and Sequencing Platform, UKZN.	Ismael et al
461	hCoV-19/Mozambique/CERI-KRISP-K025886/2021	EPI_ISL_5425744	2021-07-09	Instituto Nacional de Saude (INS)	CERI, Centre for Epidemic Response and Innvoation, Stellenbosch University and KRISP, KZN Research Innovation and Sequencing Platform, UKZN.	Ismael et al
462	hCoV-19/Mozambique/CERI-KRISP-K025913/2021	EPI_ISL_5425745	2021-06-28	Instituto Nacional de Saude (INS)	CERI, Centre for Epidemic Response and Innvoation, Stellenbosch University and KRISP, KZN Research Innovation and Sequencing Platform, UKZN.	Ismael et al
463	hCoV-19/Mozambique/CERI-KRISP-K025856/2021	EPI_ISL_5425753	2021-07-07	Instituto Nacional de Saude (INS)	CERI, Centre for Epidemic Response and Innvoation, Stellenbosch University and KRISP, KZN Research Innovation and Sequencing Platform, UKZN.	Ismael et al
464	hCoV-19/Mozambique/CERI-KRISP-K025881/2021	EPI_ISL_5425754	2021-07-08	Instituto Nacional de Saude (INS)	CERI, Centre for Epidemic Response and Innvoation, Stellenbosch University and KRISP, KZN Research Innovation and Sequencing Platform, UKZN.	Ismael et al
465	hCoV-19/Mozambique/CERI-KRISP-K025846/2021	EPI_ISL_5425755	2021-07-07	Instituto Nacional de Saude (INS)	CERI, Centre for Epidemic Response and Innvoation, Stellenbosch University and KRISP, KZN Research Innovation and Sequencing Platform, UKZN.	Ismael et al
466	hCoV-19/Mozambique/CERI-KRISP-K025889/2021	EPI_ISL_5425756	2021-07-09	Instituto Nacional de Saude (INS)	CERI, Centre for Epidemic Response and Innvoation, Stellenbosch University and KRISP, KZN Research Innovation and Sequencing Platform, UKZN.	Ismael et al
467	hCoV-19/Mozambique/CERI-KRISP-K025888/2021	EPI_ISL_5425757	2021-07-06	Instituto Nacional de Saude (INS)	CERI, Centre for Epidemic Response and Innvoation, Stellenbosch University and KRISP, KZN Research Innovation and Sequencing Platform, UKZN.	Ismael et al
468	hCoV-19/Mozambique/CERI-KRISP-K025854/2021	EPI_ISL_5425758	2021-07-07	Instituto Nacional de Saude (INS)	CERI, Centre for Epidemic Response and Innvoation, Stellenbosch University and KRISP, KZN Research Innovation and Sequencing Platform, UKZN.	Ismael et al
469	hCoV-19/Mozambique/CERI-KRISP-K025877/2021	EPI_ISL_5425759	2021-07-08	Instituto Nacional de Saude (INS)	CERI, Centre for Epidemic Response and Innvoation, Stellenbosch University and KRISP, KZN Research Innovation and Sequencing Platform, UKZN.	Ismael et al
470	hCoV-19/Mozambique/CERI-KRISP-K025923/2021	EPI_ISL_5425760	2021-07-05	Instituto Nacional de Saude (INS)	CERI, Centre for Epidemic Response and Innvoation, Stellenbosch University and KRISP, KZN Research Innovation and Sequencing Platform, UKZN.	Ismael et al
471	hCoV-19/Mozambique/CERI-KRISP-K025849/2021	EPI_ISL_5425761	2021-07-07	Instituto Nacional de Saude (INS)	CERI, Centre for Epidemic Response and Innvoation, Stellenbosch University and KRISP, KZN Research Innovation and Sequencing Platform, UKZN.	Ismael et al
472	hCoV-19/Mozambique/CERI-KRISP-K025939/2021	EPI_ISL_5425762	2021-06-29	Instituto Nacional de Saude (INS)	CERI, Centre for Epidemic Response and Innvoation, Stellenbosch University and KRISP, KZN Research Innovation and Sequencing Platform, UKZN.	Ismael et al
473	hCoV-19/Mozambique/CERI-KRISP-K025937/2021	EPI_ISL_5425763	2021-06-25	Instituto Nacional de Saude (INS)	CERI, Centre for Epidemic Response and Innvoation, Stellenbosch University and KRISP, KZN Research Innovation and Sequencing Platform, UKZN.	Ismael et al
474	hCoV-19/Mozambique/CERI-KRISP-K025870/2021	EPI_ISL_5425771	2021-07-10	Instituto Nacional de Saude (INS)	CERI, Centre for Epidemic Response and Innvoation, Stellenbosch University and KRISP, KZN Research Innovation and Sequencing Platform, UKZN.	Ismael et al
475	hCoV-19/Mozambique/CERI-KRISP-K025885/2021	EPI_ISL_5425772	2021-07-10	Instituto Nacional de Saude (INS)	CERI, Centre for Epidemic Response and Innvoation, Stellenbosch University and KRISP, KZN Research Innovation and Sequencing Platform, UKZN.	Ismael et al
476	hCoV-19/Mozambique/CERI-KRISP-K025895/2021	EPI_ISL_5425784	2021-07-07	Instituto Nacional de Saude (INS)	CERI, Centre for Epidemic Response and Innvoation, Stellenbosch University and KRISP, KZN Research Innovation and Sequencing Platform, UKZN.	Ismael et al
477	hCoV-19/Mozambique/CERI-KRISP-K025892/2021	EPI_ISL_5425777	2021-07-07	Instituto Nacional de Saude (INS)	CERI, Centre for Epidemic Response and Innvoation, Stellenbosch University and KRISP, KZN Research Innovation and Sequencing Platform, UKZN.	Ismael et al
478	hCoV-19/Mozambique/CERI-KRISP-K025864/2021	EPI_ISL_5425778	2021-08-07	Instituto Nacional de Saude (INS)	CERI, Centre for Epidemic Response and Innvoation, Stellenbosch University and KRISP, KZN Research Innovation and Sequencing Platform, UKZN.	Ismael et al
479	hCoV-19/Mozambique/CERI-KRISP-K025898/2021	EPI_ISL_5425779	2021-07-07	Instituto Nacional de Saude (INS)	CERI, Centre for Epidemic Response and Innvoation, Stellenbosch University and KRISP, KZN Research Innovation and Sequencing Platform, UKZN.	Ismael et al
480	hCoV-19/Mozambique/CERI-KRISP-K025930/2021	EPI_ISL_5425780	2021-06-28	Instituto Nacional de Saude (INS)	CERI, Centre for Epidemic Response and Innvoation, Stellenbosch University and KRISP, KZN Research Innovation and Sequencing Platform, UKZN.	Ismael et al
481	hCoV-19/Mozambique/CERI-KRISP-K025894/2021	EPI_ISL_5425785	2021-07-06	Instituto Nacional de Saude (INS)	CERI, Centre for Epidemic Response and Innvoation, Stellenbosch University and KRISP, KZN Research Innovation and Sequencing Platform, UKZN.	Ismael et al
482	hCoV-19/Mozambique/CERI-KRISP-K025925/2021	EPI_ISL_5425786	2021-07-01	Instituto Nacional de Saude (INS)	CERI, Centre for Epidemic Response and Innvoation, Stellenbosch University and KRISP, KZN Research Innovation and Sequencing Platform, UKZN.	Ismael et al
483	hCoV-19/Mozambique/CERI-KRISP-K025907/2021	EPI_ISL_5425787	2021-06-30	Instituto Nacional de Saude (INS)	CERI, Centre for Epidemic Response and Innvoation, Stellenbosch University and KRISP, KZN Research Innovation and Sequencing Platform, UKZN.	Ismael et al
484	hCoV-19/Mozambique/CERI-KRISP-K025883/2021	EPI_ISL_5425788	2021-07-12	Instituto Nacional de Saude (INS)	CERI, Centre for Epidemic Response and Innvoation, Stellenbosch University and KRISP, KZN Research Innovation and Sequencing Platform, UKZN.	Ismael et al
485	hCoV-19/Mozambique/CERI-KRISP-K025918/2021	EPI_ISL_5425789	2021-06-28	Instituto Nacional de Saude (INS)	CERI, Centre for Epidemic Response and Innvoation, Stellenbosch University and KRISP, KZN Research Innovation and Sequencing Platform, UKZN.	Ismael et al
486	hCoV-19/Mozambique/CERI-KRISP-K025865/2021	EPI_ISL_5425792	2021-07-10	Instituto Nacional de Saude (INS)	CERI, Centre for Epidemic Response and Innvoation, Stellenbosch University and KRISP, KZN Research Innovation and Sequencing Platform, UKZN.	Ismael et al
487	hCoV-19/Mozambique/CERI-KRISP-K025876/2021	EPI_ISL_5425793	2021-07-09	Instituto Nacional de Saude (INS)	CERI, Centre for Epidemic Response and Innvoation, Stellenbosch University and KRISP, KZN Research Innovation and Sequencing Platform, UKZN.	Ismael et al
488	hCoV-19/Mozambique/CERI-KRISP-K025936/2021	EPI_ISL_5425800	2021-06-24	Instituto Nacional de Saude (INS)	CERI, Centre for Epidemic Response and Innvoation, Stellenbosch University and KRISP, KZN Research Innovation and Sequencing Platform, UKZN.	Ismael et al
489	hCoV-19/Mozambique/CERI-KRISP-K025928/2021	EPI_ISL_5425808	2021-07-02	Instituto Nacional de Saude (INS)	CERI, Centre for Epidemic Response and Innvoation, Stellenbosch University and KRISP, KZN Research Innovation and Sequencing Platform, UKZN.	Ismael et al
490	hCoV-19/Mozambique/CERI-KRISP-K025867/2021	EPI_ISL_5425815	2021-07-10	Instituto Nacional de Saude (INS)	CERI, Centre for Epidemic Response and Innvoation, Stellenbosch University and KRISP, KZN Research Innovation and Sequencing Platform, UKZN.	Ismael et al
491	hCoV-19/Mozambique/CERI-KRISP-K021115/2021	EPI_ISL_3663545	2021-06-28	Instituto Nacional de Saude (INS)	CERI, Centre for Epidemic Response and Innvoation, Stellenbosch University and KRISP, KZN Research Innovation and Sequencing Platform, UKZN.	Ismael et al
492	hCoV-19/Mozambique/CERI-KRISP-K021116/2021	EPI_ISL_3663546	2021-06-29	Instituto Nacional de Saude (INS)	CERI, Centre for Epidemic Response and Innvoation, Stellenbosch University and KRISP, KZN Research Innovation and Sequencing Platform, UKZN.	Ismael et al
493	hCoV-19/Mozambique/CERI-KRISP-K021117/2021	EPI_ISL_3663547	2021-06-30	Instituto Nacional de Saude (INS)	CERI, Centre for Epidemic Response and Innvoation, Stellenbosch University and KRISP, KZN Research Innovation and Sequencing Platform, UKZN.	Ismael et al
494	hCoV-19/Mozambique/CERI-KRISP-K021118/2021	EPI_ISL_3663548	2021-06-30	Instituto Nacional de Saude (INS)	CERI, Centre for Epidemic Response and Innvoation, Stellenbosch University and KRISP, KZN Research Innovation and Sequencing Platform, UKZN.	Ismael et al
495	hCoV-19/Mozambique/CERI-KRISP-K021119/2021	EPI_ISL_3663549	2021-06-30	Instituto Nacional de Saude (INS)	CERI, Centre for Epidemic Response and Innvoation, Stellenbosch University and KRISP, KZN Research Innovation and Sequencing Platform, UKZN.	Ismael et al
496	hCoV-19/Mozambique/CERI-KRISP-K021120/2021	EPI_ISL_3663550	2021-07-01	Instituto Nacional de Saude (INS)	CERI, Centre for Epidemic Response and Innvoation, Stellenbosch University and KRISP, KZN Research Innovation and Sequencing Platform, UKZN.	Ismael et al
497	hCoV-19/Mozambique/CERI-KRISP-K021121/2021	EPI_ISL_3663551	2021-07-02	Instituto Nacional de Saude (INS)	CERI, Centre for Epidemic Response and Innvoation, Stellenbosch University and KRISP, KZN Research Innovation and Sequencing Platform, UKZN.	Ismael et al
498	hCoV-19/Mozambique/CERI-KRISP-K021122/2021	EPI_ISL_3663552	2021-07-02	Instituto Nacional de Saude (INS)	CERI, Centre for Epidemic Response and Innvoation, Stellenbosch University and KRISP, KZN Research Innovation and Sequencing Platform, UKZN.	Ismael et al
499	hCoV-19/Mozambique/CERI-KRISP-K021123/2021	EPI_ISL_3663553	2021-07-02	Instituto Nacional de Saude (INS)	CERI, Centre for Epidemic Response and Innvoation, Stellenbosch University and KRISP, KZN Research Innovation and Sequencing Platform, UKZN.	Ismael et al
500	hCoV-19/Mozambique/CERI-KRISP-K021124/2021	EPI_ISL_3663554	2021-06-29	Instituto Nacional de Saude (INS)	CERI, Centre for Epidemic Response and Innvoation, Stellenbosch University and KRISP, KZN Research Innovation and Sequencing Platform, UKZN.	Ismael et al
501	hCoV-19/Mozambique/CERI-KRISP-K021125/2021	EPI_ISL_3663555	2021-07-01	Instituto Nacional de Saude (INS)	CERI, Centre for Epidemic Response and Innvoation, Stellenbosch University and KRISP, KZN Research Innovation and Sequencing Platform, UKZN.	Ismael et al
502	hCoV-19/Mozambique/CERI-KRISP-K021126/2021	EPI_ISL_3663556	2021-07-01	Instituto Nacional de Saude (INS)	CERI, Centre for Epidemic Response and Innvoation, Stellenbosch University and KRISP, KZN Research Innovation and Sequencing Platform, UKZN.	Ismael et al
503	hCoV-19/Mozambique/CERI-KRISP-K021127/2021	EPI_ISL_3663557	2021-07-01	Instituto Nacional de Saude (INS)	CERI, Centre for Epidemic Response and Innvoation, Stellenbosch University and KRISP, KZN Research Innovation and Sequencing Platform, UKZN.	Ismael et al
504	hCoV-19/Mozambique/CERI-KRISP-K021142/2021	EPI_ISL_3663558	2021-07-05	Instituto Nacional de Saude (INS)	CERI, Centre for Epidemic Response and Innvoation, Stellenbosch University and KRISP, KZN Research Innovation and Sequencing Platform, UKZN.	Ismael et al
505	hCoV-19/Mozambique/CERI-KRISP-K021145/2021	EPI_ISL_3663559	2021-07-07	Instituto Nacional de Saude (INS)	CERI, Centre for Epidemic Response and Innvoation, Stellenbosch University and KRISP, KZN Research Innovation and Sequencing Platform, UKZN.	Ismael et al
506	hCoV-19/Mozambique/CERI-KRISP-K021147/2021	EPI_ISL_3663560	2021-07-06	Instituto Nacional de Saude (INS)	CERI, Centre for Epidemic Response and Innvoation, Stellenbosch University and KRISP, KZN Research Innovation and Sequencing Platform, UKZN.	Ismael et al
507	hCoV-19/Mozambique/CERI-KRISP-K021151/2021	EPI_ISL_3663561	2021-07-06	Instituto Nacional de Saude (INS)	CERI, Centre for Epidemic Response and Innvoation, Stellenbosch University and KRISP, KZN Research Innovation and Sequencing Platform, UKZN.	Ismael et al
508	hCoV-19/Mozambique/CERI-KRISP-K021152/2021	EPI_ISL_3663562	2021-07-09	Instituto Nacional de Saude (INS)	CERI, Centre for Epidemic Response and Innvoation, Stellenbosch University and KRISP, KZN Research Innovation and Sequencing Platform, UKZN.	Ismael et al
509	hCoV-19/Mozambique/CERI-KRISP-K021153/2021	EPI_ISL_3663563	2021-07-10	Instituto Nacional de Saude (INS)	CERI, Centre for Epidemic Response and Innvoation, Stellenbosch University and KRISP, KZN Research Innovation and Sequencing Platform, UKZN.	Ismael et al
510	hCoV-19/Mozambique/CERI-KRISP-K021154/2021	EPI_ISL_3663564	2021-07-07	Instituto Nacional de Saude (INS)	CERI, Centre for Epidemic Response and Innvoation, Stellenbosch University and KRISP, KZN Research Innovation and Sequencing Platform, UKZN.	Ismael et al
511	hCoV-19/Mozambique/CERI-KRISP-K021155/2021	EPI_ISL_3663565	2021-07-07	Instituto Nacional de Saude (INS)	CERI, Centre for Epidemic Response and Innvoation, Stellenbosch University and KRISP, KZN Research Innovation and Sequencing Platform, UKZN.	Ismael et al
512	hCoV-19/Mozambique/CERI-KRISP-K021156/2021	EPI_ISL_3663566	2021-07-12	Instituto Nacional de Saude (INS)	CERI, Centre for Epidemic Response and Innvoation, Stellenbosch University and KRISP, KZN Research Innovation and Sequencing Platform, UKZN.	Ismael et al
513	hCoV-19/Mozambique/CERI-KRISP-K021157/2021	EPI_ISL_3663567	2021-07-09	Instituto Nacional de Saude (INS)	CERI, Centre for Epidemic Response and Innvoation, Stellenbosch University and KRISP, KZN Research Innovation and Sequencing Platform, UKZN.	Ismael et al
514	hCoV-19/Mozambique/CERI-KRISP-K021158/2021	EPI_ISL_3663568	2021-07-09	Instituto Nacional de Saude (INS)	CERI, Centre for Epidemic Response and Innvoation, Stellenbosch University and KRISP, KZN Research Innovation and Sequencing Platform, UKZN.	Ismael et al
515	hCoV-19/Mozambique/CERI-KRISP-K021159/2021	EPI_ISL_3663569	2021-07-09	Instituto Nacional de Saude (INS)	CERI, Centre for Epidemic Response and Innvoation, Stellenbosch University and KRISP, KZN Research Innovation and Sequencing Platform, UKZN.	Ismael et al
516	hCoV-19/Mozambique/CERI-KRISP-K021160/2021	EPI_ISL_3663570	2021-07-09	Instituto Nacional de Saude (INS)	CERI, Centre for Epidemic Response and Innvoation, Stellenbosch University and KRISP, KZN Research Innovation and Sequencing Platform, UKZN.	Ismael et al
517	hCoV-19/Mozambique/CERI-KRISP-K021162/2021	EPI_ISL_3663571	2021-07-09	Instituto Nacional de Saude (INS)	CERI, Centre for Epidemic Response and Innvoation, Stellenbosch University and KRISP, KZN Research Innovation and Sequencing Platform, UKZN.	Ismael et al
518	hCoV-19/Mozambique/CERI-KRISP-K021163/2021	EPI_ISL_3663572	2021-07-09	Instituto Nacional de Saude (INS)	CERI, Centre for Epidemic Response and Innvoation, Stellenbosch University and KRISP, KZN Research Innovation and Sequencing Platform, UKZN.	Ismael et al
519	hCoV-19/Mozambique/CERI-KRISP-K021164/2021	EPI_ISL_3663573	2021-07-12	Instituto Nacional de Saude (INS)	CERI, Centre for Epidemic Response and Innvoation, Stellenbosch University and KRISP, KZN Research Innovation and Sequencing Platform, UKZN.	Ismael et al
520	hCoV-19/Mozambique/CERI-KRISP-K021165/2021	EPI_ISL_3663574	2021-07-09	Instituto Nacional de Saude (INS)	CERI, Centre for Epidemic Response and Innvoation, Stellenbosch University and KRISP, KZN Research Innovation and Sequencing Platform, UKZN.	Ismael et al
521	hCoV-19/Mozambique/CERI-KRISP-K021166/2021	EPI_ISL_3663575	2021-07-12	Instituto Nacional de Saude (INS)	CERI, Centre for Epidemic Response and Innvoation, Stellenbosch University and KRISP, KZN Research Innovation and Sequencing Platform, UKZN.	Ismael et al
522	hCoV-19/Mozambique/CERI-KRISP-K021167/2021	EPI_ISL_3663576	2021-07-12	Instituto Nacional de Saude (INS)	CERI, Centre for Epidemic Response and Innvoation, Stellenbosch University and KRISP, KZN Research Innovation and Sequencing Platform, UKZN.	Ismael et al
523	hCoV-19/Mozambique/CERI-KRISP-K021168/2021	EPI_ISL_3663577	2021-07-09	Instituto Nacional de Saude (INS)	CERI, Centre for Epidemic Response and Innvoation, Stellenbosch University and KRISP, KZN Research Innovation and Sequencing Platform, UKZN.	Ismael et al
524	hCoV-19/Mozambique/CERI-KRISP-K021169/2021	EPI_ISL_3663578	2021-07-08	Instituto Nacional de Saude (INS)	CERI, Centre for Epidemic Response and Innvoation, Stellenbosch University and KRISP, KZN Research Innovation and Sequencing Platform, UKZN.	Ismael et al
525	hCoV-19/Mozambique/CERI-KRISP-K021174/2021	EPI_ISL_3663579	2021-07-09	Instituto Nacional de Saude (INS)	CERI, Centre for Epidemic Response and Innvoation, Stellenbosch University and KRISP, KZN Research Innovation and Sequencing Platform, UKZN.	Ismael et al
526	hCoV-19/Mozambique/CERI-KRISP-K021175/2021	EPI_ISL_3663580	2021-07-12	Instituto Nacional de Saude (INS)	CERI, Centre for Epidemic Response and Innvoation, Stellenbosch University and KRISP, KZN Research Innovation and Sequencing Platform, UKZN.	Ismael et al
527	hCoV-19/Mozambique/CERI-KRISP-K021176/2021	EPI_ISL_3663581	2021-07-13	Instituto Nacional de Saude (INS)	CERI, Centre for Epidemic Response and Innvoation, Stellenbosch University and KRISP, KZN Research Innovation and Sequencing Platform, UKZN.	Ismael et al
528	hCoV-19/Mozambique/CERI-KRISP-K021177/2021	EPI_ISL_3663582	2021-07-10	Instituto Nacional de Saude (INS)	CERI, Centre for Epidemic Response and Innvoation, Stellenbosch University and KRISP, KZN Research Innovation and Sequencing Platform, UKZN.	Ismael et al
529	hCoV-19/Mozambique/CERI-KRISP-K021178/2021	EPI_ISL_3663583	2021-07-13	Instituto Nacional de Saude (INS)	CERI, Centre for Epidemic Response and Innvoation, Stellenbosch University and KRISP, KZN Research Innovation and Sequencing Platform, UKZN.	Ismael et al
530	hCoV-19/Mozambique/CERI-KRISP-K021179/2021	EPI_ISL_3663584	2021-07-12	Instituto Nacional de Saude (INS)	CERI, Centre for Epidemic Response and Innvoation, Stellenbosch University and KRISP, KZN Research Innovation and Sequencing Platform, UKZN.	Ismael et al
531	hCoV-19/Mozambique/CERI-KRISP-K021180/2021	EPI_ISL_3663585	2021-07-13	Instituto Nacional de Saude (INS)	CERI, Centre for Epidemic Response and Innvoation, Stellenbosch University and KRISP, KZN Research Innovation and Sequencing Platform, UKZN.	Ismael et al
532	hCoV-19/Mozambique/CERI-KRISP-K021183/2021	EPI_ISL_3663586	2021-07-13	Instituto Nacional de Saude (INS)	CERI, Centre for Epidemic Response and Innvoation, Stellenbosch University and KRISP, KZN Research Innovation and Sequencing Platform, UKZN.	Ismael et al
533	hCoV-19/Mozambique/CERI-KRISP-K021186/2021	EPI_ISL_3663587	2021-07-14	Instituto Nacional de Saude (INS)	CERI, Centre for Epidemic Response and Innvoation, Stellenbosch University and KRISP, KZN Research Innovation and Sequencing Platform, UKZN.	Ismael et al
534	hCoV-19/Mozambique/CERI-KRISP-K021190/2021	EPI_ISL_3663588	2021-07-08	Instituto Nacional de Saude (INS)	CERI, Centre for Epidemic Response and Innvoation, Stellenbosch University and KRISP, KZN Research Innovation and Sequencing Platform, UKZN.	Ismael et al
535	hCoV-19/Mozambique/CERI-KRISP-K021192/2021	EPI_ISL_3663589	2021-07-08	Instituto Nacional de Saude (INS)	CERI, Centre for Epidemic Response and Innvoation, Stellenbosch University and KRISP, KZN Research Innovation and Sequencing Platform, UKZN.	Ismael et al
536	hCoV-19/Mozambique/CERI-KRISP-K021193/2021	EPI_ISL_3663590	2021-07-13	Instituto Nacional de Saude (INS)	CERI, Centre for Epidemic Response and Innvoation, Stellenbosch University and KRISP, KZN Research Innovation and Sequencing Platform, UKZN.	Ismael et al
537	hCoV-19/Mozambique/CERI-KRISP-K021194/2021	EPI_ISL_3663591	2021-07-10	Instituto Nacional de Saude (INS)	CERI, Centre for Epidemic Response and Innvoation, Stellenbosch University and KRISP, KZN Research Innovation and Sequencing Platform, UKZN.	Ismael et al
538	hCoV-19/Mozambique/CERI-KRISP-K021195/2021	EPI_ISL_3663592	2021-07-14	Instituto Nacional de Saude (INS)	CERI, Centre for Epidemic Response and Innvoation, Stellenbosch University and KRISP, KZN Research Innovation and Sequencing Platform, UKZN.	Ismael et al
539	hCoV-19/Mozambique/CERI-KRISP-K021196/2021	EPI_ISL_3663593	2021-07-14	Instituto Nacional de Saude (INS)	CERI, Centre for Epidemic Response and Innvoation, Stellenbosch University and KRISP, KZN Research Innovation and Sequencing Platform, UKZN.	Ismael et al
540	hCoV-19/Mozambique/CERI-KRISP-K021197/2021	EPI_ISL_3663594	2021-07-10	Instituto Nacional de Saude (INS)	CERI, Centre for Epidemic Response and Innvoation, Stellenbosch University and KRISP, KZN Research Innovation and Sequencing Platform, UKZN.	Ismael et al
541	hCoV-19/Mozambique/CERI-KRISP-K021198/2021	EPI_ISL_3663595	2021-07-13	Instituto Nacional de Saude (INS)	CERI, Centre for Epidemic Response and Innvoation, Stellenbosch University and KRISP, KZN Research Innovation and Sequencing Platform, UKZN.	Ismael et al
542	hCoV-19/Mozambique/CERI-KRISP-K021199/2021	EPI_ISL_3663596	2021-07-14	Instituto Nacional de Saude (INS)	CERI, Centre for Epidemic Response and Innvoation, Stellenbosch University and KRISP, KZN Research Innovation and Sequencing Platform, UKZN.	Ismael et al
543	hCoV-19/Mozambique/CERI-KRISP-K021200/2021	EPI_ISL_3663597	2021-07-13	Instituto Nacional de Saude (INS)	CERI, Centre for Epidemic Response and Innvoation, Stellenbosch University and KRISP, KZN Research Innovation and Sequencing Platform, UKZN.	Ismael et al
544	hCoV-19/Mozambique/CERI-KRISP-K021201/2021	EPI_ISL_3663598	2021-07-07	Instituto Nacional de Saude (INS)	CERI, Centre for Epidemic Response and Innvoation, Stellenbosch University and KRISP, KZN Research Innovation and Sequencing Platform, UKZN.	Ismael et al
545	hCoV-19/Mozambique/CERI-KRISP-K021202/2021	EPI_ISL_3663599	2021-07-12	Instituto Nacional de Saude (INS)	CERI, Centre for Epidemic Response and Innvoation, Stellenbosch University and KRISP, KZN Research Innovation and Sequencing Platform, UKZN.	Ismael et al
546	hCoV-19/Mozambique/CERI-KRISP-K021203/2021	EPI_ISL_3663600	2021-07-14	Instituto Nacional de Saude (INS)	CERI, Centre for Epidemic Response and Innvoation, Stellenbosch University and KRISP, KZN Research Innovation and Sequencing Platform, UKZN.	Ismael et al
547	hCoV-19/Mozambique/CERI-KRISP-K021204/2021	EPI_ISL_3663601	2021-07-07	Instituto Nacional de Saude (INS)	CERI, Centre for Epidemic Response and Innvoation, Stellenbosch University and KRISP, KZN Research Innovation and Sequencing Platform, UKZN.	Ismael et al
548	hCoV-19/Mozambique/CERI-KRISP-K021205/2021	EPI_ISL_3663602	2021-07-15	Instituto Nacional de Saude (INS)	CERI, Centre for Epidemic Response and Innvoation, Stellenbosch University and KRISP, KZN Research Innovation and Sequencing Platform, UKZN.	Ismael et al
549	hCoV-19/Mozambique/CERI-KRISP-K021207/2021	EPI_ISL_3663603	2021-07-13	Instituto Nacional de Saude (INS)	CERI, Centre for Epidemic Response and Innvoation, Stellenbosch University and KRISP, KZN Research Innovation and Sequencing Platform, UKZN.	Ismael et al
550	hCoV-19/Mozambique/CERI-KRISP-K021210/2021	EPI_ISL_3663604	2021-07-14	Instituto Nacional de Saude (INS)	CERI, Centre for Epidemic Response and Innvoation, Stellenbosch University and KRISP, KZN Research Innovation and Sequencing Platform, UKZN.	Ismael et al
551	hCoV-19/Mozambique/CERI-KRISP-K021211/2021	EPI_ISL_3663605	2021-07-16	Instituto Nacional de Saude (INS)	CERI, Centre for Epidemic Response and Innvoation, Stellenbosch University and KRISP, KZN Research Innovation and Sequencing Platform, UKZN.	Ismael et al
552	hCoV-19/Mozambique/CERI-KRISP-K021212/2021	EPI_ISL_3663606	2021-07-14	Instituto Nacional de Saude (INS)	CERI, Centre for Epidemic Response and Innvoation, Stellenbosch University and KRISP, KZN Research Innovation and Sequencing Platform, UKZN.	Ismael et al
553	hCoV-19/Mozambique/CERI-KRISP-K021214/2021	EPI_ISL_3663607	2021-07-14	Instituto Nacional de Saude (INS)	CERI, Centre for Epidemic Response and Innvoation, Stellenbosch University and KRISP, KZN Research Innovation and Sequencing Platform, UKZN.	Ismael et al
554	hCoV-19/Mozambique/CERI-KRISP-K021220/2021	EPI_ISL_3663608	2021-07-14	Instituto Nacional de Saude (INS)	CERI, Centre for Epidemic Response and Innvoation, Stellenbosch University and KRISP, KZN Research Innovation and Sequencing Platform, UKZN.	Ismael et al
555	hCoV-19/Mozambique/CERI-KRISP-K021221/2021	EPI_ISL_3663609	2021-07-15	Instituto Nacional de Saude (INS)	CERI, Centre for Epidemic Response and Innvoation, Stellenbosch University and KRISP, KZN Research Innovation and Sequencing Platform, UKZN.	Ismael et al
556	hCoV-19/Mozambique/CERI-KRISP-K021224/2021	EPI_ISL_3663610	2021-07-15	Instituto Nacional de Saude (INS)	CERI, Centre for Epidemic Response and Innvoation, Stellenbosch University and KRISP, KZN Research Innovation and Sequencing Platform, UKZN.	Ismael et al
557	hCoV-19/Mozambique/COV-2158-A1805/2021	EPI_ISL_5822699	2021-05-05	Instiuto Nacional de Saude, Mozambique	Forschungszentrum Borstel	Upatel et al
558	hCoV-19/Mozambique/INS-K011776/2020	EPI_ISL_2396890	2020-08-25	Instituto Nacional de Saude (INS)	KRISP, KZN Research Innovation and Sequencing Platform	Ismael et al
559	hCoV-19/Mozambique/INS-K011777/2020	EPI_ISL_2396891	2020-08-26	Instituto Nacional de Saude (INS)	KRISP, KZN Research Innovation and Sequencing Platform	Ismael et al
560	hCoV-19/Mozambique/INS-K011778/2020	EPI_ISL_2396892	2020-08-25	Instituto Nacional de Saude (INS)	KRISP, KZN Research Innovation and Sequencing Platform	Ismael et al
561	hCoV-19/Mozambique/INS-K011779/2020	EPI_ISL_2396893	2020-08-25	Instituto Nacional de Saude (INS)	KRISP, KZN Research Innovation and Sequencing Platform	Ismael et al
562	hCoV-19/Mozambique/INS-K011780/2020	EPI_ISL_2396894	2020-08-25	Instituto Nacional de Saude (INS)	KRISP, KZN Research Innovation and Sequencing Platform	Ismael et al
563	hCoV-19/Mozambique/INS-K011782/2020	EPI_ISL_2396896	2020-08-24	Instituto Nacional de Saude (INS)	KRISP, KZN Research Innovation and Sequencing Platform	Ismael et al
564	hCoV-19/Mozambique/INS-K011792/2020	EPI_ISL_2396897	2020-10-10	Instituto Nacional de Saude (INS)	KRISP, KZN Research Innovation and Sequencing Platform	Ismael et al
565	hCoV-19/Mozambique/INS-K011793/2020	EPI_ISL_2396898	2020-10-10	Instituto Nacional de Saude (INS)	KRISP, KZN Research Innovation and Sequencing Platform	Ismael et al
566	hCoV-19/Mozambique/INS-K011794/2020	EPI_ISL_2396899	2020-10-10	Instituto Nacional de Saude (INS)	KRISP, KZN Research Innovation and Sequencing Platform	Ismael et al
567	hCoV-19/Mozambique/INS-K011795/2020	EPI_ISL_2396900	2020-09-29	Instituto Nacional de Saude (INS)	KRISP, KZN Research Innovation and Sequencing Platform	Ismael et al
568	hCoV-19/Mozambique/INS-K011796/2020	EPI_ISL_2396901	2020-09-29	Instituto Nacional de Saude (INS)	KRISP, KZN Research Innovation and Sequencing Platform	Ismael et al
569	hCoV-19/Mozambique/INS-K011797/2020	EPI_ISL_2396902	2020-09-24	Instituto Nacional de Saude (INS)	KRISP, KZN Research Innovation and Sequencing Platform	Ismael et al
570	hCoV-19/Mozambique/INS-K011798/2020	EPI_ISL_2396903	2020-09-26	Instituto Nacional de Saude (INS)	KRISP, KZN Research Innovation and Sequencing Platform	Ismael et al
571	hCoV-19/Mozambique/INS-K011799/2020	EPI_ISL_2396904	2020-09-09	Instituto Nacional de Saude (INS)	KRISP, KZN Research Innovation and Sequencing Platform	Ismael et al
572	hCoV-19/Mozambique/INS-K011800/2020	EPI_ISL_2396905	2020-11-09	Instituto Nacional de Saude (INS)	KRISP, KZN Research Innovation and Sequencing Platform	Ismael et al
573	hCoV-19/Mozambique/INS-K011801/2020	EPI_ISL_2396906	2020-10-09	Instituto Nacional de Saude (INS)	KRISP, KZN Research Innovation and Sequencing Platform	Ismael et al
574	hCoV-19/Mozambique/INS-K011802/2020	EPI_ISL_2396907	2020-11-09	Instituto Nacional de Saude (INS)	KRISP, KZN Research Innovation and Sequencing Platform	Ismael et al
575	hCoV-19/Mozambique/INS-K011803/2020	EPI_ISL_2396908	2020-11-09	Instituto Nacional de Saude (INS)	KRISP, KZN Research Innovation and Sequencing Platform	Ismael et al
576	hCoV-19/Mozambique/INS-K011804/2020	EPI_ISL_2396909	2020-11-09	Instituto Nacional de Saude (INS)	KRISP, KZN Research Innovation and Sequencing Platform	Ismael et al
577	hCoV-19/Mozambique/INS-K011805/2020	EPI_ISL_2396910	2020-10-10	Instituto Nacional de Saude (INS)	KRISP, KZN Research Innovation and Sequencing Platform	Ismael et al
578	hCoV-19/Mozambique/INS-K011807/2020	EPI_ISL_2396912	2020-11-10	Instituto Nacional de Saude (INS)	KRISP, KZN Research Innovation and Sequencing Platform	Ismael et al
579	hCoV-19/Mozambique/INS-K011808/2020	EPI_ISL_2396913	2020-09-10	Instituto Nacional de Saude (INS)	KRISP, KZN Research Innovation and Sequencing Platform	Ismael et al
580	hCoV-19/Mozambique/INS-K011810/2020	EPI_ISL_2396915	2020-10-10	Instituto Nacional de Saude (INS)	KRISP, KZN Research Innovation and Sequencing Platform	Ismael et al
581	hCoV-19/Mozambique/INS-K011811/2020	EPI_ISL_2396916	2020-12-10	Instituto Nacional de Saude (INS)	KRISP, KZN Research Innovation and Sequencing Platform	Ismael et al
582	hCoV-19/Mozambique/INS-K011812/2020	EPI_ISL_2396917	2020-10-10	Instituto Nacional de Saude (INS)	KRISP, KZN Research Innovation and Sequencing Platform	Ismael et al
583	hCoV-19/Mozambique/INS-K011813/2020	EPI_ISL_2396918	2020-10-10	Instituto Nacional de Saude (INS)	KRISP, KZN Research Innovation and Sequencing Platform	Ismael et al
584	hCoV-19/Mozambique/INS-K011814/2020	EPI_ISL_2396919	2020-10-10	Instituto Nacional de Saude (INS)	KRISP, KZN Research Innovation and Sequencing Platform	Ismael et al
585	hCoV-19/Mozambique/INS-K011815/2020	EPI_ISL_2396920	2020-10-31	Instituto Nacional de Saude (INS)	KRISP, KZN Research Innovation and Sequencing Platform	Ismael et al
586	hCoV-19/Mozambique/INS-K011816/2020	EPI_ISL_2396921	2020-10-30	Instituto Nacional de Saude (INS)	KRISP, KZN Research Innovation and Sequencing Platform	Ismael et al
587	hCoV-19/Mozambique/INS-K011817/2020	EPI_ISL_2396922	2020-10-16	Instituto Nacional de Saude (INS)	KRISP, KZN Research Innovation and Sequencing Platform	Ismael et al
588	hCoV-19/Mozambique/INS-K011818/2020	EPI_ISL_2396923	2020-10-21	Instituto Nacional de Saude (INS)	KRISP, KZN Research Innovation and Sequencing Platform	Ismael et al
589	hCoV-19/Mozambique/INS-K011819/2020	EPI_ISL_2396924	2020-10-30	Instituto Nacional de Saude (INS)	KRISP, KZN Research Innovation and Sequencing Platform	Ismael et al
590	hCoV-19/Mozambique/INS-K011820/2020	EPI_ISL_2396925	2020-10-27	Instituto Nacional de Saude (INS)	KRISP, KZN Research Innovation and Sequencing Platform	Ismael et al
591	hCoV-19/Mozambique/INS-K011821/2020	EPI_ISL_2396926	2020-10-27	Instituto Nacional de Saude (INS)	KRISP, KZN Research Innovation and Sequencing Platform	Ismael et al
592	hCoV-19/Mozambique/INS-K011822/2020	EPI_ISL_2396927	2020-10-31	Instituto Nacional de Saude (INS)	KRISP, KZN Research Innovation and Sequencing Platform	Ismael et al
593	hCoV-19/Mozambique/INS-K011823/2020	EPI_ISL_2396928	2020-10-31	Instituto Nacional de Saude (INS)	KRISP, KZN Research Innovation and Sequencing Platform	Ismael et al
594	hCoV-19/Mozambique/INS-K011824/2020	EPI_ISL_2396929	2020-10-31	Instituto Nacional de Saude (INS)	KRISP, KZN Research Innovation and Sequencing Platform	Ismael et al
595	hCoV-19/Mozambique/INS-K011825/2020	EPI_ISL_2396930	2020-11-01	Instituto Nacional de Saude (INS)	KRISP, KZN Research Innovation and Sequencing Platform	Ismael et al
596	hCoV-19/Mozambique/INS-K011827/2020	EPI_ISL_2396932	2020-11-15	Instituto Nacional de Saude (INS)	KRISP, KZN Research Innovation and Sequencing Platform	Ismael et al
597	hCoV-19/Mozambique/INS-K011828/2020	EPI_ISL_2396933	2020-11-03	Instituto Nacional de Saude (INS)	KRISP, KZN Research Innovation and Sequencing Platform	Ismael et al
598	hCoV-19/Mozambique/INS-K011829/2020	EPI_ISL_2396934	2020-11-03	Instituto Nacional de Saude (INS)	KRISP, KZN Research Innovation and Sequencing Platform	Ismael et al
599	hCoV-19/Mozambique/INS-K011830/2020	EPI_ISL_2396935	2020-11-04	Instituto Nacional de Saude (INS)	KRISP, KZN Research Innovation and Sequencing Platform	Ismael et al
600	hCoV-19/Mozambique/INS-K011831/2020	EPI_ISL_2396936	2020-11-03	Instituto Nacional de Saude (INS)	KRISP, KZN Research Innovation and Sequencing Platform	Ismael et al
601	hCoV-19/Mozambique/INS-K011832/2020	EPI_ISL_2396937	2020-11-03	Instituto Nacional de Saude (INS)	KRISP, KZN Research Innovation and Sequencing Platform	Ismael et al
602	hCoV-19/Mozambique/INS-K011833/2020	EPI_ISL_2396938	2020-11-04	Instituto Nacional de Saude (INS)	KRISP, KZN Research Innovation and Sequencing Platform	Ismael et al
603	hCoV-19/Mozambique/INS-K011834/2020	EPI_ISL_2396939	2020-11-05	Instituto Nacional de Saude (INS)	KRISP, KZN Research Innovation and Sequencing Platform	Ismael et al
604	hCoV-19/Mozambique/INS-K011835/2020	EPI_ISL_2396940	2020-11-04	Instituto Nacional de Saude (INS)	KRISP, KZN Research Innovation and Sequencing Platform	Ismael et al
605	hCoV-19/Mozambique/INS-K011836/2020	EPI_ISL_2396941	2020-11-04	Instituto Nacional de Saude (INS)	KRISP, KZN Research Innovation and Sequencing Platform	Ismael et al
606	hCoV-19/Mozambique/INS-K011837/2020	EPI_ISL_2396942	2020-11-04	Instituto Nacional de Saude (INS)	KRISP, KZN Research Innovation and Sequencing Platform	Ismael et al
607	hCoV-19/Mozambique/INS-K011838/2020	EPI_ISL_2396943	2020-11-04	Instituto Nacional de Saude (INS)	KRISP, KZN Research Innovation and Sequencing Platform	Ismael et al
608	hCoV-19/Mozambique/INS-K011839/2020	EPI_ISL_2396944	2020-11-04	Instituto Nacional de Saude (INS)	KRISP, KZN Research Innovation and Sequencing Platform	Ismael et al
609	hCoV-19/Mozambique/INS-K011840/2020	EPI_ISL_2396945	2020-11-04	Instituto Nacional de Saude (INS)	KRISP, KZN Research Innovation and Sequencing Platform	Ismael et al
610	hCoV-19/Mozambique/INS-K011841/2020	EPI_ISL_2396946	2020-11-05	Instituto Nacional de Saude (INS)	KRISP, KZN Research Innovation and Sequencing Platform	Ismael et al
611	hCoV-19/Mozambique/INS-K011842/2020	EPI_ISL_2396947	2020-11-04	Instituto Nacional de Saude (INS)	KRISP, KZN Research Innovation and Sequencing Platform	Ismael et al
612	hCoV-19/Mozambique/INS-K011843/2020	EPI_ISL_2396948	2020-11-03	Instituto Nacional de Saude (INS)	KRISP, KZN Research Innovation and Sequencing Platform	Ismael et al
613	hCoV-19/Mozambique/INS-K011846/2021	EPI_ISL_2396951	2021-02-06	Instituto Nacional de Saude (INS)	KRISP, KZN Research Innovation and Sequencing Platform	Ismael et al
614	hCoV-19/Mozambique/INS-K011847/2021	EPI_ISL_2396952	2021-02-05	Instituto Nacional de Saude (INS)	KRISP, KZN Research Innovation and Sequencing Platform	Ismael et al
615	hCoV-19/Mozambique/INS-K011848/2021	EPI_ISL_2396953	2021-02-06	Instituto Nacional de Saude (INS)	KRISP, KZN Research Innovation and Sequencing Platform	Ismael et al
616	hCoV-19/Mozambique/INS-K011849/2021	EPI_ISL_2396954	2021-02-19	Instituto Nacional de Saude (INS)	KRISP, KZN Research Innovation and Sequencing Platform	Ismael et al
617	hCoV-19/Mozambique/INS-K011850/2021	EPI_ISL_2396955	2021-02-08	Instituto Nacional de Saude (INS)	KRISP, KZN Research Innovation and Sequencing Platform	Ismael et al
618	hCoV-19/Mozambique/INS-K011851/2021	EPI_ISL_2396956	2021-02-08	Instituto Nacional de Saude (INS)	KRISP, KZN Research Innovation and Sequencing Platform	Ismael et al
619	hCoV-19/Mozambique/INS-K011853/2021	EPI_ISL_2396958	2021-02-21	Instituto Nacional de Saude (INS)	KRISP, KZN Research Innovation and Sequencing Platform	Ismael et al
620	hCoV-19/Mozambique/INS-K011854/2021	EPI_ISL_2396959	2021-02-19	Instituto Nacional de Saude (INS)	KRISP, KZN Research Innovation and Sequencing Platform	Ismael et al
621	hCoV-19/Mozambique/INS-K011855/2021	EPI_ISL_2396960	2021-02-08	Instituto Nacional de Saude (INS)	KRISP, KZN Research Innovation and Sequencing Platform	Ismael et al
622	hCoV-19/Mozambique/INS-K011856/2021	EPI_ISL_2396961	2021-02-06	Instituto Nacional de Saude (INS)	KRISP, KZN Research Innovation and Sequencing Platform	Ismael et al
623	hCoV-19/Mozambique/INS-K011857/2021	EPI_ISL_2396962	2021-02-08	Instituto Nacional de Saude (INS)	KRISP, KZN Research Innovation and Sequencing Platform	Ismael et al
624	hCoV-19/Mozambique/INS-K011859/2021	EPI_ISL_2396964	2021-02-08	Instituto Nacional de Saude (INS)	KRISP, KZN Research Innovation and Sequencing Platform	Ismael et al
625	hCoV-19/Mozambique/INS-K011861/2021	EPI_ISL_2396966	2021-02-08	Instituto Nacional de Saude (INS)	KRISP, KZN Research Innovation and Sequencing Platform	Ismael et al
626	hCoV-19/Mozambique/INS-K011862/2021	EPI_ISL_2396967	2021-02-22	Instituto Nacional de Saude (INS)	KRISP, KZN Research Innovation and Sequencing Platform	Ismael et al
627	hCoV-19/Mozambique/INS-K011863/2021	EPI_ISL_2396968	2021-02-19	Instituto Nacional de Saude (INS)	KRISP, KZN Research Innovation and Sequencing Platform	Ismael et al
628	hCoV-19/Mozambique/INS-K011866/2021	EPI_ISL_2396971	2021-02-08	Instituto Nacional de Saude (INS)	KRISP, KZN Research Innovation and Sequencing Platform	Ismael et al
629	hCoV-19/Mozambique/INS-K011867/2021	EPI_ISL_2396972	2021-02-08	Instituto Nacional de Saude (INS)	KRISP, KZN Research Innovation and Sequencing Platform	Ismael et al
630	hCoV-19/Mozambique/INS-K011869/2021	EPI_ISL_2396974	2021-02-05	Instituto Nacional de Saude (INS)	KRISP, KZN Research Innovation and Sequencing Platform	Ismael et al
631	hCoV-19/Mozambique/INS-K011870/2021	EPI_ISL_2396975	2021-02-05	Instituto Nacional de Saude (INS)	KRISP, KZN Research Innovation and Sequencing Platform	Ismael et al
632	hCoV-19/Mozambique/INS-K011873/2021	EPI_ISL_2396978	2021-02-05	Instituto Nacional de Saude (INS)	KRISP, KZN Research Innovation and Sequencing Platform	Ismael et al
633	hCoV-19/Mozambique/INS-K011874/2021	EPI_ISL_2396979	2021-02-08	Instituto Nacional de Saude (INS)	KRISP, KZN Research Innovation and Sequencing Platform	Ismael et al
634	hCoV-19/Mozambique/INS-K011875/2021	EPI_ISL_2396980	2021-02-05	Instituto Nacional de Saude (INS)	KRISP, KZN Research Innovation and Sequencing Platform	Ismael et al
635	hCoV-19/Mozambique/INS-K011876/2021	EPI_ISL_2396981	2021-02-06	Instituto Nacional de Saude (INS)	KRISP, KZN Research Innovation and Sequencing Platform	Ismael et al
636	hCoV-19/Mozambique/INS-K011877/2021	EPI_ISL_2396982	2021-02-05	Instituto Nacional de Saude (INS)	KRISP, KZN Research Innovation and Sequencing Platform	Ismael et al
637	hCoV-19/Mozambique/INS-K011878/2021	EPI_ISL_2396983	2021-02-09	Instituto Nacional de Saude (INS)	KRISP, KZN Research Innovation and Sequencing Platform	Ismael et al
638	hCoV-19/Mozambique/INS-K011879/2021	EPI_ISL_2396984	2021-02-05	Instituto Nacional de Saude (INS)	KRISP, KZN Research Innovation and Sequencing Platform	Ismael et al
639	hCoV-19/Mozambique/INS-K011880/2021	EPI_ISL_2396985	2021-02-05	Instituto Nacional de Saude (INS)	KRISP, KZN Research Innovation and Sequencing Platform	Ismael et al
640	hCoV-19/Mozambique/INS-K011881/2021	EPI_ISL_2396986	2021-02-19	Instituto Nacional de Saude (INS)	KRISP, KZN Research Innovation and Sequencing Platform	Ismael et al
641	hCoV-19/Mozambique/INS-K011883/2021	EPI_ISL_2396988	2021-02-08	Instituto Nacional de Saude (INS)	KRISP, KZN Research Innovation and Sequencing Platform	Ismael et al
642	hCoV-19/Mozambique/INS-K011884/2021	EPI_ISL_2396989	2021-02-08	Instituto Nacional de Saude (INS)	KRISP, KZN Research Innovation and Sequencing Platform	Ismael et al
643	hCoV-19/Mozambique/INS-K011885/2021	EPI_ISL_2396990	2021-02-08	Instituto Nacional de Saude (INS)	KRISP, KZN Research Innovation and Sequencing Platform	Ismael et al
644	hCoV-19/Mozambique/INS-K011886/2021	EPI_ISL_2396991	2021-02-08	Instituto Nacional de Saude (INS)	KRISP, KZN Research Innovation and Sequencing Platform	Ismael et al
645	hCoV-19/Mozambique/INS-K011887/2021	EPI_ISL_2396992	2021-02-08	Instituto Nacional de Saude (INS)	KRISP, KZN Research Innovation and Sequencing Platform	Ismael et al
646	hCoV-19/Mozambique/INS-K011888/2021	EPI_ISL_2396993	2021-02-09	Instituto Nacional de Saude (INS)	KRISP, KZN Research Innovation and Sequencing Platform	Ismael et al
647	hCoV-19/Mozambique/INS-K011889/2021	EPI_ISL_2396994	2021-02-08	Instituto Nacional de Saude (INS)	KRISP, KZN Research Innovation and Sequencing Platform	Ismael et al
648	hCoV-19/Mozambique/INS-K011890/2021	EPI_ISL_2396995	2021-02-08	Instituto Nacional de Saude (INS)	KRISP, KZN Research Innovation and Sequencing Platform	Ismael et al
649	hCoV-19/Mozambique/INS-K011891/2021	EPI_ISL_2396996	2021-02-02	Instituto Nacional de Saude (INS)	KRISP, KZN Research Innovation and Sequencing Platform	Ismael et al
650	hCoV-19/Mozambique/INS-K011892/2021	EPI_ISL_2396997	2021-02-05	Instituto Nacional de Saude (INS)	KRISP, KZN Research Innovation and Sequencing Platform	Ismael et al
651	hCoV-19/Mozambique/INS-K011893/2021	EPI_ISL_2396998	2021-02-06	Instituto Nacional de Saude (INS)	KRISP, KZN Research Innovation and Sequencing Platform	Ismael et al
652	hCoV-19/Mozambique/INS-K011894/2021	EPI_ISL_2396999	2021-02-08	Instituto Nacional de Saude (INS)	KRISP, KZN Research Innovation and Sequencing Platform	Ismael et al
653	hCoV-19/Mozambique/INS-K011806/2020	EPI_ISL_2396911	2020-11-10	Instituto Nacional de Saude (INS)	KRISP, KZN Research Innovation and Sequencing Platform	Ismael et al
654	hCoV-19/Mozambique/INS-K011826/2020	EPI_ISL_2396931	2020-11-02	Instituto Nacional de Saude (INS)	KRISP, KZN Research Innovation and Sequencing Platform	Ismael et al
655	hCoV-19/Mozambique/INS-K011844/2020	EPI_ISL_2396949	2020-11-03	Instituto Nacional de Saude (INS)	KRISP, KZN Research Innovation and Sequencing Platform	Ismael et al
656	hCoV-19/Mozambique/INS-K011845/2021	EPI_ISL_2396950	2021-02-07	Instituto Nacional de Saude (INS)	KRISP, KZN Research Innovation and Sequencing Platform	Ismael et al
657	hCoV-19/Mozambique/INS-K011860/2021	EPI_ISL_2396965	2021-02-08	Instituto Nacional de Saude (INS)	KRISP, KZN Research Innovation and Sequencing Platform	Ismael et al
658	hCoV-19/Mozambique/INS-K011864/2021	EPI_ISL_2396969	2021-02-18	Instituto Nacional de Saude (INS)	KRISP, KZN Research Innovation and Sequencing Platform	Ismael et al
659	hCoV-19/Mozambique/INS-K011865/2021	EPI_ISL_2396970	2021-02-05	Instituto Nacional de Saude (INS)	KRISP, KZN Research Innovation and Sequencing Platform	Ismael et al
660	hCoV-19/Mozambique/INS-K011868/2021	EPI_ISL_2396973	2021-02-22	Instituto Nacional de Saude (INS)	KRISP, KZN Research Innovation and Sequencing Platform	Ismael et al
661	hCoV-19/Mozambique/INS-K011871/2021	EPI_ISL_2396976	2021-02-23	Instituto Nacional de Saude (INS)	KRISP, KZN Research Innovation and Sequencing Platform	Ismael et al
662	hCoV-19/Mozambique/INS-K011872/2021	EPI_ISL_2396977	2021-02-08	Instituto Nacional de Saude (INS)	KRISP, KZN Research Innovation and Sequencing Platform	Ismael et al
663	hCoV-19/Mozambique/CERI-KRISP-K027119/2021	EPI_ISL_6511754	2021-07-27	Instituto Nacional de Saude (INS)	CERI, Centre for Epidemic Response and Innvoation, Stellenbosch University and KRISP, KZN Research Innovation and Sequencing Platform, UKZN.	Ismael et al
664	hCoV-19/Mozambique/CERI-KRISP-K027123/2021	EPI_ISL_6511755	2021-07-27	Instituto Nacional de Saude (INS)	CERI, Centre for Epidemic Response and Innvoation, Stellenbosch University and KRISP, KZN Research Innovation and Sequencing Platform, UKZN.	Ismael et al
665	hCoV-19/Mozambique/CERI-KRISP-K027124/2021	EPI_ISL_6511756	2021-07-26	Instituto Nacional de Saude (INS)	CERI, Centre for Epidemic Response and Innvoation, Stellenbosch University and KRISP, KZN Research Innovation and Sequencing Platform, UKZN.	Ismael et al
666	hCoV-19/Mozambique/CERI-KRISP-K027125/2021	EPI_ISL_6511757	2021-07-26	Instituto Nacional de Saude (INS)	CERI, Centre for Epidemic Response and Innvoation, Stellenbosch University and KRISP, KZN Research Innovation and Sequencing Platform, UKZN.	Ismael et al
667	hCoV-19/Mozambique/CERI-KRISP-K027126/2021	EPI_ISL_6511758	2021-07-26	Instituto Nacional de Saude (INS)	CERI, Centre for Epidemic Response and Innvoation, Stellenbosch University and KRISP, KZN Research Innovation and Sequencing Platform, UKZN.	Ismael et al
668	hCoV-19/Mozambique/CERI-KRISP-K027127/2021	EPI_ISL_6511759	2021-07-26	Instituto Nacional de Saude (INS)	CERI, Centre for Epidemic Response and Innvoation, Stellenbosch University and KRISP, KZN Research Innovation and Sequencing Platform, UKZN.	Ismael et al
669	hCoV-19/Mozambique/CERI-KRISP-K027128/2021	EPI_ISL_6511760	2021-07-26	Instituto Nacional de Saude (INS)	CERI, Centre for Epidemic Response and Innvoation, Stellenbosch University and KRISP, KZN Research Innovation and Sequencing Platform, UKZN.	Ismael et al
670	hCoV-19/Mozambique/CERI-KRISP-K027129/2021	EPI_ISL_6511761	2021-07-26	Instituto Nacional de Saude (INS)	CERI, Centre for Epidemic Response and Innvoation, Stellenbosch University and KRISP, KZN Research Innovation and Sequencing Platform, UKZN.	Ismael et al
671	hCoV-19/Mozambique/CERI-KRISP-K027130/2021	EPI_ISL_6511762	2021-07-26	Instituto Nacional de Saude (INS)	CERI, Centre for Epidemic Response and Innvoation, Stellenbosch University and KRISP, KZN Research Innovation and Sequencing Platform, UKZN.	Ismael et al
672	hCoV-19/Mozambique/CERI-KRISP-K027131/2021	EPI_ISL_6511763	2021-07-27	Instituto Nacional de Saude (INS)	CERI, Centre for Epidemic Response and Innvoation, Stellenbosch University and KRISP, KZN Research Innovation and Sequencing Platform, UKZN.	Ismael et al
673	hCoV-19/Mozambique/CERI-KRISP-K027132/2021	EPI_ISL_6511764	2021-07-28	Instituto Nacional de Saude (INS)	CERI, Centre for Epidemic Response and Innvoation, Stellenbosch University and KRISP, KZN Research Innovation and Sequencing Platform, UKZN.	Ismael et al
674	hCoV-19/Mozambique/CERI-KRISP-K027133/2021	EPI_ISL_6511765	2021-07-27	Instituto Nacional de Saude (INS)	CERI, Centre for Epidemic Response and Innvoation, Stellenbosch University and KRISP, KZN Research Innovation and Sequencing Platform, UKZN.	Ismael et al
675	hCoV-19/Mozambique/CERI-KRISP-K027134/2021	EPI_ISL_6511766	2021-07-26	Instituto Nacional de Saude (INS)	CERI, Centre for Epidemic Response and Innvoation, Stellenbosch University and KRISP, KZN Research Innovation and Sequencing Platform, UKZN.	Ismael et al
676	hCoV-19/Mozambique/MZ-L-IBV-97025356/2021	EPI_ISL_3246523	2021-01-12	CISM & ISGlobal, Institut de Salut Global de Barcelona	Instituto de Biomedicina de Valencia - CSIC	Mayor et al
677	hCoV-19/Mozambique/MZ-L-IBV-97025358/2021	EPI_ISL_3246524	2021-02-09	CISM & ISGlobal, Institut de Salut Global de Barcelona	Instituto de Biomedicina de Valencia - CSIC	Mayor et al
678	hCoV-19/Mozambique/MZ-L-IBV-97025362/2021	EPI_ISL_3246525	2021-01-06	CISM & ISGlobal, Institut de Salut Global de Barcelona	Instituto de Biomedicina de Valencia - CSIC	Mayor et al
679	hCoV-19/Mozambique/MZ-L-IBV-97025375/2021	EPI_ISL_3246526	2021-01-23	CISM & ISGlobal, Institut de Salut Global de Barcelona	Instituto de Biomedicina de Valencia - CSIC	Mayor et al
680	hCoV-19/Mozambique/MZ-L-IBV-97025389/2021	EPI_ISL_3246528	2021-01-24	CISM & ISGlobal, Institut de Salut Global de Barcelona	Instituto de Biomedicina de Valencia - CSIC	Mayor et al
681	hCoV-19/Mozambique/MZ-L-IBV-97025465/2021	EPI_ISL_3246529	2021-02-28	CISM & ISGlobal, Institut de Salut Global de Barcelona	Instituto de Biomedicina de Valencia - CSIC	Mayor et al
682	hCoV-19/Mozambique/MZ-L-IBV-97025279/2021	EPI_ISL_3246530	2021-03-04	CISM & ISGlobal, Institut de Salut Global de Barcelona	Instituto de Biomedicina de Valencia - CSIC	Mayor et al
683	hCoV-19/Mozambique/MZ-L-IBV-97025398/2021	EPI_ISL_3246531	2021-01-25	CISM & ISGlobal, Institut de Salut Global de Barcelona	Instituto de Biomedicina de Valencia - CSIC	Mayor et al
684	hCoV-19/Mozambique/CERI-KRISP-K015044/2021	EPI_ISL_2617114	2021-03-16	Instituto Nacional de Saude (INS)	CERI, Centre for Epidemic Response and Innvoation, Stellenbosch University and KRISP, KZN Research Innovation and Sequencing Platform, UKZN.	Ismael et al
685	hCoV-19/Mozambique/CERI-KRISP-K015065/2021	EPI_ISL_2617122	2021-03-18	Instituto Nacional de Saude (INS)	CERI, Centre for Epidemic Response and Innvoation, Stellenbosch University and KRISP, KZN Research Innovation and Sequencing Platform, UKZN.	Ismael et al
686	hCoV-19/Mozambique/CERI-KRISP-K015010/2021	EPI_ISL_2617125	2021-03-09	Instituto Nacional de Saude (INS)	CERI, Centre for Epidemic Response and Innvoation, Stellenbosch University and KRISP, KZN Research Innovation and Sequencing Platform, UKZN.	Ismael et al
687	hCoV-19/Mozambique/CERI-KRISP-K015048/2021	EPI_ISL_2617126	2021-03-17	Instituto Nacional de Saude (INS)	CERI, Centre for Epidemic Response and Innvoation, Stellenbosch University and KRISP, KZN Research Innovation and Sequencing Platform, UKZN.	Ismael et al
688	hCoV-19/Mozambique/CERI-KRISP-K015036/2021	EPI_ISL_2617130	2021-03-12	Instituto Nacional de Saude (INS)	CERI, Centre for Epidemic Response and Innvoation, Stellenbosch University and KRISP, KZN Research Innovation and Sequencing Platform, UKZN.	Ismael et al
689	hCoV-19/Mozambique/CERI-KRISP-K015003/2021	EPI_ISL_2617135	2021-03-08	Instituto Nacional de Saude (INS)	CERI, Centre for Epidemic Response and Innvoation, Stellenbosch University and KRISP, KZN Research Innovation and Sequencing Platform, UKZN.	Ismael et al
690	hCoV-19/Mozambique/CERI-KRISP-K015079/2021	EPI_ISL_2617136	2021-03-18	Instituto Nacional de Saude (INS)	CERI, Centre for Epidemic Response and Innvoation, Stellenbosch University and KRISP, KZN Research Innovation and Sequencing Platform, UKZN.	Ismael et al
691	hCoV-19/Mozambique/CERI-KRISP-K015066/2021	EPI_ISL_2617140	2021-03-18	Instituto Nacional de Saude (INS)	CERI, Centre for Epidemic Response and Innvoation, Stellenbosch University and KRISP, KZN Research Innovation and Sequencing Platform, UKZN.	Ismael et al
692	hCoV-19/Mozambique/CERI-KRISP-K015011/2021	EPI_ISL_2617141	2021-03-10	Instituto Nacional de Saude (INS)	CERI, Centre for Epidemic Response and Innvoation, Stellenbosch University and KRISP, KZN Research Innovation and Sequencing Platform, UKZN.	Ismael et al
693	hCoV-19/Mozambique/CERI-KRISP-K015076/2021	EPI_ISL_2617144	2021-03-18	Instituto Nacional de Saude (INS)	CERI, Centre for Epidemic Response and Innvoation, Stellenbosch University and KRISP, KZN Research Innovation and Sequencing Platform, UKZN.	Ismael et al
694	hCoV-19/Mozambique/CERI-KRISP-K015077/2021	EPI_ISL_2617147	2021-03-18	Instituto Nacional de Saude (INS)	CERI, Centre for Epidemic Response and Innvoation, Stellenbosch University and KRISP, KZN Research Innovation and Sequencing Platform, UKZN.	Ismael et al
695	hCoV-19/Mozambique/CERI-KRISP-K015045/2021	EPI_ISL_2617148	2021-03-17	Instituto Nacional de Saude (INS)	CERI, Centre for Epidemic Response and Innvoation, Stellenbosch University and KRISP, KZN Research Innovation and Sequencing Platform, UKZN.	Ismael et al
696	hCoV-19/Mozambique/CERI-KRISP-K015023/2021	EPI_ISL_2617153	2021-03-11	Instituto Nacional de Saude (INS)	CERI, Centre for Epidemic Response and Innvoation, Stellenbosch University and KRISP, KZN Research Innovation and Sequencing Platform, UKZN.	Ismael et al
697	hCoV-19/Mozambique/CERI-KRISP-K015073/2021	EPI_ISL_2617157	2021-03-17	Instituto Nacional de Saude (INS)	CERI, Centre for Epidemic Response and Innvoation, Stellenbosch University and KRISP, KZN Research Innovation and Sequencing Platform, UKZN.	Ismael et al
698	hCoV-19/Mozambique/CERI-KRISP-K015080/2021	EPI_ISL_2617167	2021-03-18	Instituto Nacional de Saude (INS)	CERI, Centre for Epidemic Response and Innvoation, Stellenbosch University and KRISP, KZN Research Innovation and Sequencing Platform, UKZN.	Ismael et al
699	hCoV-19/Mozambique/MZ-L-IBV-97025341/2021	EPI_ISL_3246522	2021-02-09	CISM & ISGlobal, Institut de Salut Global de Barcelona	Instituto de Biomedicina de Valencia - CSIC	Mayor et al
700	hCoV-19/Mozambique/MZ-L-IBV-97025383/2021	EPI_ISL_3246527	2021-01-24	CISM & ISGlobal, Institut de Salut Global de Barcelona	Instituto de Biomedicina de Valencia - CSIC	Mayor et al
701	hCoV-19/Mozambique/MZ-L-IBV-97025448/2020	EPI_ISL_3246532	2020-11-10	CISM & ISGlobal, Institut de Salut Global de Barcelona	Instituto de Biomedicina de Valencia - CSIC	Mayor et al
702	hCoV-19/Mozambique/CERI-KRISP-K033869/2021	EPI_ISL_9418720	2021-12-08	Instituto Nacional de Saude (INS)	CERI, Centre for Epidemic Response and Innovation, Stellenbosch University and KRISP, KZN Research Innovation and Sequencing Platform, UKZN.	Ismael et al
703	hCoV-19/Mozambique/CERI-KRISP-K027956/2021	EPI_ISL_7417212	2021-09-17	Instituto Nacional de Saude (INS)	CERI, Centre for Epidemic Response and Innvoation, Stellenbosch University and KRISP, KZN Research Innovation and Sequencing Platform, UKZN.	Ismael et al
704	hCoV-19/Mozambique/CERI-KRISP-K027945/2021	EPI_ISL_7417350	2021-09-02	Instituto Nacional de Saude (INS)	CERI, Centre for Epidemic Response and Innvoation, Stellenbosch University and KRISP, KZN Research Innovation and Sequencing Platform, UKZN.	Ismael et al
705	hCoV-19/Mozambique/CERI-KRISP-K026112/2021	EPI_ISL_5942710	2021-07-19	Instituto Nacional de Saude (INS)	CERI, Centre for Epidemic Response and Innvoation, Stellenbosch University and KRISP, KZN Research Innovation and Sequencing Platform, UKZN.	Ismael et al
706	hCoV-19/Mozambique/CERI-KRISP-K026127/2021	EPI_ISL_5942713	2021-07-20	Instituto Nacional de Saude (INS)	CERI, Centre for Epidemic Response and Innvoation, Stellenbosch University and KRISP, KZN Research Innovation and Sequencing Platform, UKZN.	Ismael et al
707	hCoV-19/Mozambique/CERI-KRISP-K026104/2021	EPI_ISL_5942720	2021-07-02	Instituto Nacional de Saude (INS)	CERI, Centre for Epidemic Response and Innvoation, Stellenbosch University and KRISP, KZN Research Innovation and Sequencing Platform, UKZN.	Ismael et al
708	hCoV-19/Mozambique/CERI-KRISP-K026161/2021	EPI_ISL_5942745	2021-07-20	Instituto Nacional de Saude (INS)	CERI, Centre for Epidemic Response and Innvoation, Stellenbosch University and KRISP, KZN Research Innovation and Sequencing Platform, UKZN.	Ismael et al
709	hCoV-19/Mozambique/CERI-KRISP-K026154/2021	EPI_ISL_5942753	2021-07-19	Instituto Nacional de Saude (INS)	CERI, Centre for Epidemic Response and Innvoation, Stellenbosch University and KRISP, KZN Research Innovation and Sequencing Platform, UKZN.	Ismael et al
710	hCoV-19/Mozambique/CERI-KRISP-K026164/2021	EPI_ISL_5942780	2021-07-31	Instituto Nacional de Saude (INS)	CERI, Centre for Epidemic Response and Innvoation, Stellenbosch University and KRISP, KZN Research Innovation and Sequencing Platform, UKZN.	Ismael et al
711	hCoV-19/Mozambique/COV-2140-A1787/2021	EPI_ISL_5822550	2021-06-18	Instiuto Nacional de Saude, Mozambique	Forschungszentrum Borstel	Upatel et al
712	hCoV-19/Mozambique/COV-2185-A1832/2021	EPI_ISL_5822551	2021-06-21	Instiuto Nacional de Saude, Mozambique	Forschungszentrum Borstel	Upatel et al
713	hCoV-19/Mozambique/COV-2252-A1900/2021	EPI_ISL_5822552	2021-05-31	Instiuto Nacional de Saude, Mozambique	Forschungszentrum Borstel	Upatel et al
714	hCoV-19/Mozambique/COV-2326-A1975/2021	EPI_ISL_5822553	2021-04-26	Instiuto Nacional de Saude, Mozambique	Forschungszentrum Borstel	Upatel et al
715	hCoV-19/Mozambique/COV-2329-A1978/2021	EPI_ISL_5822554	2021-05-29	Instiuto Nacional de Saude, Mozambique	Forschungszentrum Borstel	Upatel et al
716	hCoV-19/Mozambique/COV-2330-A1979/2021	EPI_ISL_5822555	2021-05-29	Instiuto Nacional de Saude, Mozambique	Forschungszentrum Borstel	Upatel et al
717	hCoV-19/Mozambique/COV-2332-A1981/2021	EPI_ISL_5822556	2021-05-29	Instiuto Nacional de Saude, Mozambique	Forschungszentrum Borstel	Upatel et al
718	hCoV-19/Mozambique/COV-2340-A1989/2021	EPI_ISL_5822557	2021-05-05	Instiuto Nacional de Saude, Mozambique	Forschungszentrum Borstel	Upatel et al
719	hCoV-19/Mozambique/COV-2342-A1991/2021	EPI_ISL_5822558	2021-04-26	Instiuto Nacional de Saude, Mozambique	Forschungszentrum Borstel	Upatel et al
720	hCoV-19/Mozambique/COV-2349-A1998/2021	EPI_ISL_5822560	2021-05-31	Instiuto Nacional de Saude, Mozambique	Forschungszentrum Borstel	Upatel et al
721	hCoV-19/Mozambique/COV-2373-A2022/2021	EPI_ISL_5822563	2021-04-29	Instiuto Nacional de Saude, Mozambique	Forschungszentrum Borstel	Upatel et al
722	hCoV-19/Mozambique/COV-2293-A1941/2021	EPI_ISL_5822565	2021-05-31	Instiuto Nacional de Saude, Mozambique	Forschungszentrum Borstel	Upatel et al
723	hCoV-19/Mozambique/COV-2298-A1946/2021	EPI_ISL_5822566	2021-05-31	Instiuto Nacional de Saude, Mozambique	Forschungszentrum Borstel	Upatel et al
724	hCoV-19/Mozambique/COV-2301-A1949/2021	EPI_ISL_5822567	2021-04-26	Instiuto Nacional de Saude, Mozambique	Forschungszentrum Borstel	Upatel et al
725	hCoV-19/Mozambique/COV-2321-A1969/2021	EPI_ISL_5822568	2021-04-30	Instiuto Nacional de Saude, Mozambique	Forschungszentrum Borstel	Upatel et al
726	hCoV-19/Mozambique/COV-2083-A1706/2021	EPI_ISL_5822569	2021-06-21	Instiuto Nacional de Saude, Mozambique	Forschungszentrum Borstel	Upatel et al
727	hCoV-19/Mozambique/COV-2086-A1709/2021	EPI_ISL_5822571	2021-06-17	Instiuto Nacional de Saude, Mozambique	Forschungszentrum Borstel	Upatel et al
728	hCoV-19/Mozambique/COV-2088-A1711/2021	EPI_ISL_5822572	2021-06-16	Instiuto Nacional de Saude, Mozambique	Forschungszentrum Borstel	Upatel et al
729	hCoV-19/Mozambique/COV-2091-A1714/2021	EPI_ISL_5822574	2021-06-21	Instiuto Nacional de Saude, Mozambique	Forschungszentrum Borstel	Upatel et al
730	hCoV-19/Mozambique/COV-2092-A1715/2021	EPI_ISL_5822575	2021-06-21	Instiuto Nacional de Saude, Mozambique	Forschungszentrum Borstel	Upatel et al
731	hCoV-19/Mozambique/COV-2093-A1716/2021	EPI_ISL_5822576	2021-06-21	Instiuto Nacional de Saude, Mozambique	Forschungszentrum Borstel	Upatel et al
732	hCoV-19/Mozambique/COV-2094-A1717/2021	EPI_ISL_5822577	2021-06-17	Instiuto Nacional de Saude, Mozambique	Forschungszentrum Borstel	Upatel et al
733	hCoV-19/Mozambique/COV-2096-A1719/2021	EPI_ISL_5822579	2021-06-21	Instiuto Nacional de Saude, Mozambique	Forschungszentrum Borstel	Upatel et al
734	hCoV-19/Mozambique/COV-2097-A1720/2021	EPI_ISL_5822580	2021-06-21	Instiuto Nacional de Saude, Mozambique	Forschungszentrum Borstel	Upatel et al
735	hCoV-19/Mozambique/COV-2099-A1722/2021	EPI_ISL_5822581	2021-06-21	Instiuto Nacional de Saude, Mozambique	Forschungszentrum Borstel	Upatel et al
736	hCoV-19/Mozambique/COV-2100-A1723/2021	EPI_ISL_5822582	2021-06-18	Instiuto Nacional de Saude, Mozambique	Forschungszentrum Borstel	Upatel et al
737	hCoV-19/Mozambique/COV-2133-A1780/2021	EPI_ISL_5822583	2021-06-17	Instiuto Nacional de Saude, Mozambique	Forschungszentrum Borstel	Upatel et al
738	hCoV-19/Mozambique/COV-2135-A1782/2021	EPI_ISL_5822584	2021-06-22	Instiuto Nacional de Saude, Mozambique	Forschungszentrum Borstel	Upatel et al
739	hCoV-19/Mozambique/COV-2136-A1783/2021	EPI_ISL_5822586	2021-06-17	Instiuto Nacional de Saude, Mozambique	Forschungszentrum Borstel	Upatel et al
740	hCoV-19/Mozambique/COV-2138-A1785/2021	EPI_ISL_5822587	2021-06-22	Instiuto Nacional de Saude, Mozambique	Forschungszentrum Borstel	Upatel et al
741	hCoV-19/Mozambique/COV-2146-A1793/2021	EPI_ISL_5822588	2021-06-21	Instiuto Nacional de Saude, Mozambique	Forschungszentrum Borstel	Upatel et al
742	hCoV-19/Mozambique/COV-2159-A1806/2021	EPI_ISL_5822589	2021-06-17	Instiuto Nacional de Saude, Mozambique	Forschungszentrum Borstel	Upatel et al
743	hCoV-19/Mozambique/COV-2165-A1812/2021	EPI_ISL_5822590	2021-06-21	Instiuto Nacional de Saude, Mozambique	Forschungszentrum Borstel	Upatel et al
744	hCoV-19/Mozambique/COV-2166-A1813/2021	EPI_ISL_5822591	2021-06-21	Instiuto Nacional de Saude, Mozambique	Forschungszentrum Borstel	Upatel et al
745	hCoV-19/Mozambique/COV-2167-A1814/2021	EPI_ISL_5822592	2021-06-21	Instiuto Nacional de Saude, Mozambique	Forschungszentrum Borstel	Upatel et al
746	hCoV-19/Mozambique/COV-2171-A1818/2021	EPI_ISL_5822594	2021-06-21	Instiuto Nacional de Saude, Mozambique	Forschungszentrum Borstel	Upatel et al
747	hCoV-19/Mozambique/COV-2178-A1825/2021	EPI_ISL_5822595	2021-06-17	Instiuto Nacional de Saude, Mozambique	Forschungszentrum Borstel	Upatel et al
748	hCoV-19/Mozambique/COV-2179-A1826/2021	EPI_ISL_5822596	2021-06-21	Instiuto Nacional de Saude, Mozambique	Forschungszentrum Borstel	Upatel et al
749	hCoV-19/Mozambique/COV-2180-A1827/2021	EPI_ISL_5822597	2021-06-16	Instiuto Nacional de Saude, Mozambique	Forschungszentrum Borstel	Upatel et al
750	hCoV-19/Mozambique/COV-2181-A1828/2021	EPI_ISL_5822598	2021-06-17	Instiuto Nacional de Saude, Mozambique	Forschungszentrum Borstel	Upatel et al
751	hCoV-19/Mozambique/COV-2182-A1829/2021	EPI_ISL_5822599	2021-06-14	Instiuto Nacional de Saude, Mozambique	Forschungszentrum Borstel	Upatel et al
752	hCoV-19/Mozambique/COV-2191-A1838/2021	EPI_ISL_5822601	2021-06-16	Instiuto Nacional de Saude, Mozambique	Forschungszentrum Borstel	Upatel et al
753	hCoV-19/Mozambique/COV-2192-A1839/2021	EPI_ISL_5822602	2021-06-21	Instiuto Nacional de Saude, Mozambique	Forschungszentrum Borstel	Upatel et al
754	hCoV-19/Mozambique/COV-2193-A1840/2021	EPI_ISL_5822603	2021-06-17	Instiuto Nacional de Saude, Mozambique	Forschungszentrum Borstel	Upatel et al
755	hCoV-19/Mozambique/COV-2197-A1844/2021	EPI_ISL_5822604	2021-06-21	Instiuto Nacional de Saude, Mozambique	Forschungszentrum Borstel	Upatel et al
756	hCoV-19/Mozambique/COV-2200-A1847/2021	EPI_ISL_5822605	2021-06-21	Instiuto Nacional de Saude, Mozambique	Forschungszentrum Borstel	Upatel et al
757	hCoV-19/Mozambique/COV-2204-A1851/2021	EPI_ISL_5822606	2021-06-21	Instiuto Nacional de Saude, Mozambique	Forschungszentrum Borstel	Upatel et al
758	hCoV-19/Mozambique/COV-2205-A1852/2021	EPI_ISL_5822607	2021-06-17	Instiuto Nacional de Saude, Mozambique	Forschungszentrum Borstel	Upatel et al
759	hCoV-19/Mozambique/COV-2207-A1854/2021	EPI_ISL_5822608	2021-06-18	Instiuto Nacional de Saude, Mozambique	Forschungszentrum Borstel	Upatel et al
760	hCoV-19/Mozambique/COV-2208-A1855/2021	EPI_ISL_5822609	2021-06-21	Instiuto Nacional de Saude, Mozambique	Forschungszentrum Borstel	Upatel et al
761	hCoV-19/Mozambique/COV-2209-A1856/2021	EPI_ISL_5822610	2021-06-20	Instiuto Nacional de Saude, Mozambique	Forschungszentrum Borstel	Upatel et al
762	hCoV-19/Mozambique/COV-2212-A1859/2021	EPI_ISL_5822611	2021-06-18	Instiuto Nacional de Saude, Mozambique	Forschungszentrum Borstel	Upatel et al
763	hCoV-19/Mozambique/COV-2214-A1861/2021	EPI_ISL_5822612	2021-06-21	Instiuto Nacional de Saude, Mozambique	Forschungszentrum Borstel	Upatel et al
764	hCoV-19/Mozambique/COV-2216-A1863/2021	EPI_ISL_5822613	2021-06-21	Instiuto Nacional de Saude, Mozambique	Forschungszentrum Borstel	Upatel et al
765	hCoV-19/Mozambique/COV-2217-A1864/2021	EPI_ISL_5822614	2021-06-21	Instiuto Nacional de Saude, Mozambique	Forschungszentrum Borstel	Upatel et al
766	hCoV-19/Mozambique/COV-2218-A1865/2021	EPI_ISL_5822615	2021-06-21	Instiuto Nacional de Saude, Mozambique	Forschungszentrum Borstel	Upatel et al
767	hCoV-19/Mozambique/COV-2221-A1868/2021	EPI_ISL_5822616	2021-06-21	Instiuto Nacional de Saude, Mozambique	Forschungszentrum Borstel	Upatel et al
768	hCoV-19/Mozambique/COV-2223-A1870/2021	EPI_ISL_5822617	2021-06-21	Instiuto Nacional de Saude, Mozambique	Forschungszentrum Borstel	Upatel et al
769	hCoV-19/Mozambique/COV-2224-A1871/2021	EPI_ISL_5822618	2021-06-21	Instiuto Nacional de Saude, Mozambique	Forschungszentrum Borstel	Upatel et al
770	hCoV-19/Mozambique/COV-2226-A1873/2021	EPI_ISL_5822619	2021-06-21	Instiuto Nacional de Saude, Mozambique	Forschungszentrum Borstel	Upatel et al
771	hCoV-19/Mozambique/COV-2227-A1874/2021	EPI_ISL_5822620	2021-06-21	Instiuto Nacional de Saude, Mozambique	Forschungszentrum Borstel	Upatel et al
772	hCoV-19/Mozambique/COV-2228-A1876/2021	EPI_ISL_5822621	2021-06-21	Instiuto Nacional de Saude, Mozambique	Forschungszentrum Borstel	Upatel et al
773	hCoV-19/Mozambique/COV-2230-A1878/2021	EPI_ISL_5822623	2021-06-21	Instiuto Nacional de Saude, Mozambique	Forschungszentrum Borstel	Upatel et al
774	hCoV-19/Mozambique/COV-2231-A1879/2021	EPI_ISL_5822624	2021-06-18	Instiuto Nacional de Saude, Mozambique	Forschungszentrum Borstel	Upatel et al
775	hCoV-19/Mozambique/COV-2232-A1880/2021	EPI_ISL_5822625	2021-06-21	Instiuto Nacional de Saude, Mozambique	Forschungszentrum Borstel	Upatel et al
776	hCoV-19/Mozambique/COV-2233-A1881/2021	EPI_ISL_5822626	2021-06-17	Instiuto Nacional de Saude, Mozambique	Forschungszentrum Borstel	Upatel et al
777	hCoV-19/Mozambique/COV-2234-A1882/2021	EPI_ISL_5822627	2021-06-21	Instiuto Nacional de Saude, Mozambique	Forschungszentrum Borstel	Upatel et al
778	hCoV-19/Mozambique/COV-2235-A1883/2021	EPI_ISL_5822628	2021-06-21	Instiuto Nacional de Saude, Mozambique	Forschungszentrum Borstel	Upatel et al
779	hCoV-19/Mozambique/COV-2236-A1884/2021	EPI_ISL_5822629	2021-06-17	Instiuto Nacional de Saude, Mozambique	Forschungszentrum Borstel	Upatel et al
780	hCoV-19/Mozambique/COV-2237-A1885/2021	EPI_ISL_5822630	2021-06-21	Instiuto Nacional de Saude, Mozambique	Forschungszentrum Borstel	Upatel et al
781	hCoV-19/Mozambique/COV-2238-A1886/2021	EPI_ISL_5822631	2021-06-17	Instiuto Nacional de Saude, Mozambique	Forschungszentrum Borstel	Upatel et al
782	hCoV-19/Mozambique/COV-2239-A1887/2021	EPI_ISL_5822632	2021-06-17	Instiuto Nacional de Saude, Mozambique	Forschungszentrum Borstel	Upatel et al
783	hCoV-19/Mozambique/COV-2241-A1889/2021	EPI_ISL_5822633	2021-06-21	Instiuto Nacional de Saude, Mozambique	Forschungszentrum Borstel	Upatel et al
784	hCoV-19/Mozambique/COV-2244-A1892/2021	EPI_ISL_5822634	2021-06-21	Instiuto Nacional de Saude, Mozambique	Forschungszentrum Borstel	Upatel et al
785	hCoV-19/Mozambique/COV-2249-A1897/2021	EPI_ISL_5822635	2021-06-18	Instiuto Nacional de Saude, Mozambique	Forschungszentrum Borstel	Upatel et al
786	hCoV-19/Mozambique/COV-2254-A1902/2021	EPI_ISL_5822636	2021-06-17	Instiuto Nacional de Saude, Mozambique	Forschungszentrum Borstel	Upatel et al
787	hCoV-19/Mozambique/COV-2255-A1903/2021	EPI_ISL_5822637	2021-06-17	Instiuto Nacional de Saude, Mozambique	Forschungszentrum Borstel	Upatel et al
788	hCoV-19/Mozambique/COV-2256-A1904/2021	EPI_ISL_5822638	2021-06-22	Instiuto Nacional de Saude, Mozambique	Forschungszentrum Borstel	Upatel et al
789	hCoV-19/Mozambique/COV-2257-A1905/2021	EPI_ISL_5822639	2021-06-25	Instiuto Nacional de Saude, Mozambique	Forschungszentrum Borstel	Upatel et al
790	hCoV-19/Mozambique/COV-2259-A1907/2021	EPI_ISL_5822640	2021-06-24	Instiuto Nacional de Saude, Mozambique	Forschungszentrum Borstel	Upatel et al
791	hCoV-19/Mozambique/COV-2260-A1908/2021	EPI_ISL_5822641	2021-06-24	Instiuto Nacional de Saude, Mozambique	Forschungszentrum Borstel	Upatel et al
792	hCoV-19/Mozambique/COV-2261-A1909/2021	EPI_ISL_5822642	2021-06-24	Instiuto Nacional de Saude, Mozambique	Forschungszentrum Borstel	Upatel et al
793	hCoV-19/Mozambique/COV-2262-A1910/2021	EPI_ISL_5822643	2021-06-24	Instiuto Nacional de Saude, Mozambique	Forschungszentrum Borstel	Upatel et al
794	hCoV-19/Mozambique/COV-2263-A1911/2021	EPI_ISL_5822644	2021-06-06	Instiuto Nacional de Saude, Mozambique	Forschungszentrum Borstel	Upatel et al
795	hCoV-19/Mozambique/COV-2272-A1920/2021	EPI_ISL_5822645	2021-06-17	Instiuto Nacional de Saude, Mozambique	Forschungszentrum Borstel	Upatel et al
796	hCoV-19/Mozambique/COV-2274-A1922/2021	EPI_ISL_5822646	2021-06-18	Instiuto Nacional de Saude, Mozambique	Forschungszentrum Borstel	Upatel et al
797	hCoV-19/Mozambique/COV-2278-A1926/2021	EPI_ISL_5822647	2021-06-25	Instiuto Nacional de Saude, Mozambique	Forschungszentrum Borstel	Upatel et al
798	hCoV-19/Mozambique/COV-2280-A1928/2021	EPI_ISL_5822648	2021-06-24	Instiuto Nacional de Saude, Mozambique	Forschungszentrum Borstel	Upatel et al
799	hCoV-19/Mozambique/COV-2281-A1929/2021	EPI_ISL_5822649	2021-06-21	Instiuto Nacional de Saude, Mozambique	Forschungszentrum Borstel	Upatel et al
800	hCoV-19/Mozambique/COV-2356-A2005/2021	EPI_ISL_5822650	2021-05-27	Instiuto Nacional de Saude, Mozambique	Forschungszentrum Borstel	Upatel et al
801	hCoV-19/Mozambique/COV-2357-A2006/2021	EPI_ISL_5822651	2021-05-29	Instiuto Nacional de Saude, Mozambique	Forschungszentrum Borstel	Upatel et al
802	hCoV-19/Mozambique/COV-2359-A2008/2021	EPI_ISL_5822652	2021-05-24	Instiuto Nacional de Saude, Mozambique	Forschungszentrum Borstel	Upatel et al
803	hCoV-19/Mozambique/COV-2292-A1940/2021	EPI_ISL_5822653	2021-05-31	Instiuto Nacional de Saude, Mozambique	Forschungszentrum Borstel	Upatel et al
804	hCoV-19/Mozambique/COV-2302-A1950/2021	EPI_ISL_5822654	2021-05-20	Instiuto Nacional de Saude, Mozambique	Forschungszentrum Borstel	Upatel et al
805	hCoV-19/Mozambique/COV-2310-A1958/2021	EPI_ISL_5822655	2021-06-22	Instiuto Nacional de Saude, Mozambique	Forschungszentrum Borstel	Upatel et al
806	hCoV-19/Mozambique/COV-2314-A1962/2021	EPI_ISL_5822656	2021-06-16	Instiuto Nacional de Saude, Mozambique	Forschungszentrum Borstel	Upatel et al
807	hCoV-19/Mozambique/COV-2225-A1872/2021	EPI_ISL_5822657	2021-06-16	Instiuto Nacional de Saude, Mozambique	Forschungszentrum Borstel	Upatel et al
808	hCoV-19/Mozambique/COV-2175-A1822/2021	EPI_ISL_5822658	2021-06-21	Instiuto Nacional de Saude, Mozambique	Forschungszentrum Borstel	Upatel et al
809	hCoV-19/Mozambique/COV-2264-A1912/2021	EPI_ISL_5822659	2021-06-05	Instiuto Nacional de Saude, Mozambique	Forschungszentrum Borstel	Upatel et al
810	hCoV-19/Mozambique/COV-2265-A1913/2021	EPI_ISL_5822660	2021-06-18	Instiuto Nacional de Saude, Mozambique	Forschungszentrum Borstel	Upatel et al
811	hCoV-19/Mozambique/COV-2297-A1945/2021	EPI_ISL_5822661	2021-05-31	Instiuto Nacional de Saude, Mozambique	Forschungszentrum Borstel	Upatel et al
812	hCoV-19/Mozambique/COV-2210-A1857/2021	EPI_ISL_5822662	2021-06-17	Instiuto Nacional de Saude, Mozambique	Forschungszentrum Borstel	Upatel et al
813	hCoV-19/Mozambique/COV-2147-A1794/2021	EPI_ISL_5822663	2021-06-21	Instiuto Nacional de Saude, Mozambique	Forschungszentrum Borstel	Upatel et al
814	hCoV-19/Mozambique/COV-2266-A1914/2021	EPI_ISL_5822664	2021-06-17	Instiuto Nacional de Saude, Mozambique	Forschungszentrum Borstel	Upatel et al
815	hCoV-19/Mozambique/COV-2194-A1841/2021	EPI_ISL_5822665	2021-06-21	Instiuto Nacional de Saude, Mozambique	Forschungszentrum Borstel	Upatel et al
816	hCoV-19/Mozambique/COV-2155-A1802/2021	EPI_ISL_5822666	2021-05-04	Instiuto Nacional de Saude, Mozambique	Forschungszentrum Borstel	Upatel et al
817	hCoV-19/Mozambique/COV-2098-A1721/2021	EPI_ISL_5822668	2021-06-17	Instiuto Nacional de Saude, Mozambique	Forschungszentrum Borstel	Upatel et al
818	hCoV-19/Mozambique/COV-2177-A1824/2021	EPI_ISL_5822669	2021-06-17	Instiuto Nacional de Saude, Mozambique	Forschungszentrum Borstel	Upatel et al
819	hCoV-19/Mozambique/COV-2318-A1966/2021	EPI_ISL_5822670	2021-06-16	Instiuto Nacional de Saude, Mozambique	Forschungszentrum Borstel	Upatel et al
820	hCoV-19/Mozambique/COV-2279-A1927/2021	EPI_ISL_5822671	2021-06-24	Instiuto Nacional de Saude, Mozambique	Forschungszentrum Borstel	Upatel et al
821	hCoV-19/Mozambique/COV-2242-A1890/2021	EPI_ISL_5822672	2021-06-21	Instiuto Nacional de Saude, Mozambique	Forschungszentrum Borstel	Upatel et al
822	hCoV-19/Mozambique/COV-2154-A2127/2021	EPI_ISL_5822673	2021-05-04	Instiuto Nacional de Saude, Mozambique	Forschungszentrum Borstel	Upatel et al
823	hCoV-19/Mozambique/COV-2341-A1990/2021	EPI_ISL_5822674	2021-05-04	Instiuto Nacional de Saude, Mozambique	Forschungszentrum Borstel	Upatel et al
824	hCoV-19/Mozambique/COV-2220-A1867/2021	EPI_ISL_5822675	2021-06-21	Instiuto Nacional de Saude, Mozambique	Forschungszentrum Borstel	Upatel et al
825	hCoV-19/Mozambique/COV-2101-A1724/2021	EPI_ISL_5822676	2021-06-21	Instiuto Nacional de Saude, Mozambique	Forschungszentrum Borstel	Upatel et al
826	hCoV-19/Mozambique/COV-2376-A2025/2021	EPI_ISL_5822677	2021-03-31	Instiuto Nacional de Saude, Mozambique	Forschungszentrum Borstel	Upatel et al
827	hCoV-19/Mozambique/COV-2270-A2130/2021	EPI_ISL_5822678	2021-06-17	Instiuto Nacional de Saude, Mozambique	Forschungszentrum Borstel	Upatel et al
828	hCoV-19/Mozambique/COV-2382-A2031/2021	EPI_ISL_5822679	2021-06-16	Instiuto Nacional de Saude, Mozambique	Forschungszentrum Borstel	Upatel et al
829	hCoV-19/Mozambique/COV-2334-A1983/2021	EPI_ISL_5822680	2021-05-10	Instiuto Nacional de Saude, Mozambique	Forschungszentrum Borstel	Upatel et al
830	hCoV-19/Mozambique/COV-2305-A2131/2021	EPI_ISL_5822681	2021-06-16	Instiuto Nacional de Saude, Mozambique	Forschungszentrum Borstel	Upatel et al
831	hCoV-19/Mozambique/COV-2360-A2009/2021	EPI_ISL_5822685	2021-05-27	Instiuto Nacional de Saude, Mozambique	Forschungszentrum Borstel	Upatel et al
832	hCoV-19/Mozambique/COV-2087-A1710/2021	EPI_ISL_5822686	2021-06-21	Instiuto Nacional de Saude, Mozambique	Forschungszentrum Borstel	Upatel et al
833	hCoV-19/Mozambique/COV-2090-A1713/2021	EPI_ISL_5822687	2021-06-21	Instiuto Nacional de Saude, Mozambique	Forschungszentrum Borstel	Upatel et al
834	hCoV-19/Mozambique/COV-2187-A1834/2021	EPI_ISL_5822688	2021-06-22	Instiuto Nacional de Saude, Mozambique	Forschungszentrum Borstel	Upatel et al
835	hCoV-19/Mozambique/COV-2250-A1898/2021	EPI_ISL_5822689	2021-04-26	Instiuto Nacional de Saude, Mozambique	Forschungszentrum Borstel	Upatel et al
836	hCoV-19/Mozambique/COV-2176-A1823/2021	EPI_ISL_5822690	2021-06-17	Instiuto Nacional de Saude, Mozambique	Forschungszentrum Borstel	Upatel et al
837	hCoV-19/Mozambique/COV-2289-A1937/2021	EPI_ISL_5822691	2021-05-07	Instiuto Nacional de Saude, Mozambique	Forschungszentrum Borstel	Upatel et al
838	hCoV-19/Mozambique/COV-2276-A1924/2021	EPI_ISL_5822692	2021-06-24	Instiuto Nacional de Saude, Mozambique	Forschungszentrum Borstel	Upatel et al
839	hCoV-19/Mozambique/COV-2195-A1842/2021	EPI_ISL_5822693	2021-06-18	Instiuto Nacional de Saude, Mozambique	Forschungszentrum Borstel	Upatel et al
840	hCoV-19/Mozambique/COV-2157-A1804/2021	EPI_ISL_5822694	2021-05-05	Instiuto Nacional de Saude, Mozambique	Forschungszentrum Borstel	Upatel et al
841	hCoV-19/Mozambique/COV-2287-A1935/2021	EPI_ISL_5822695	2021-05-01	Instiuto Nacional de Saude, Mozambique	Forschungszentrum Borstel	Upatel et al
842	hCoV-19/Mozambique/COV-2137-A1784/2021	EPI_ISL_5822696	2021-06-17	Instiuto Nacional de Saude, Mozambique	Forschungszentrum Borstel	Upatel et al
843	hCoV-19/Mozambique/COV-2306-A1954/2021	EPI_ISL_5822697	2021-05-18	Instiuto Nacional de Saude, Mozambique	Forschungszentrum Borstel	Upatel et al
844	hCoV-19/Mozambique/COV-2258-A1906/2021	EPI_ISL_5822698	2021-06-24	Instiuto Nacional de Saude, Mozambique	Forschungszentrum Borstel	Upatel et al
845	hCoV-19/Mozambique/COV-2243-A1891/2021	EPI_ISL_5822700	2021-06-21	Instiuto Nacional de Saude, Mozambique	Forschungszentrum Borstel	Upatel et al
846	hCoV-19/Mozambique/COV-2344-A1993/2021	EPI_ISL_5822701	2021-04-30	Instiuto Nacional de Saude, Mozambique	Forschungszentrum Borstel	Upatel et al
847	hCoV-19/Mozambique/CERI-KRISP-K026128/2021	EPI_ISL_5942665	2021-07-22	Instituto Nacional de Saude (INS)	CERI, Centre for Epidemic Response and Innvoation, Stellenbosch University and KRISP, KZN Research Innovation and Sequencing Platform, UKZN.	Ismael et al
848	hCoV-19/Mozambique/CERI-KRISP-K026116/2021	EPI_ISL_5942666	2021-07-19	Instituto Nacional de Saude (INS)	CERI, Centre for Epidemic Response and Innvoation, Stellenbosch University and KRISP, KZN Research Innovation and Sequencing Platform, UKZN.	Ismael et al
849	hCoV-19/Mozambique/CERI-KRISP-K026165/2021	EPI_ISL_5942667	2021-07-30	Instituto Nacional de Saude (INS)	CERI, Centre for Epidemic Response and Innvoation, Stellenbosch University and KRISP, KZN Research Innovation and Sequencing Platform, UKZN.	Ismael et al
850	hCoV-19/Mozambique/CERI-KRISP-K026124/2021	EPI_ISL_5942668	2021-07-19	Instituto Nacional de Saude (INS)	CERI, Centre for Epidemic Response and Innvoation, Stellenbosch University and KRISP, KZN Research Innovation and Sequencing Platform, UKZN.	Ismael et al
851	hCoV-19/Mozambique/CERI-KRISP-K026129/2021	EPI_ISL_5942669	2021-07-16	Instituto Nacional de Saude (INS)	CERI, Centre for Epidemic Response and Innvoation, Stellenbosch University and KRISP, KZN Research Innovation and Sequencing Platform, UKZN.	Ismael et al
852	hCoV-19/Mozambique/CERI-KRISP-K026163/2021	EPI_ISL_5942670	2021-07-30	Instituto Nacional de Saude (INS)	CERI, Centre for Epidemic Response and Innvoation, Stellenbosch University and KRISP, KZN Research Innovation and Sequencing Platform, UKZN.	Ismael et al
853	hCoV-19/Mozambique/CERI-KRISP-K026148/2021	EPI_ISL_5942671	2021-07-19	Instituto Nacional de Saude (INS)	CERI, Centre for Epidemic Response and Innvoation, Stellenbosch University and KRISP, KZN Research Innovation and Sequencing Platform, UKZN.	Ismael et al
854	hCoV-19/Mozambique/CERI-KRISP-K026153/2021	EPI_ISL_5942672	2021-07-14	Instituto Nacional de Saude (INS)	CERI, Centre for Epidemic Response and Innvoation, Stellenbosch University and KRISP, KZN Research Innovation and Sequencing Platform, UKZN.	Ismael et al
855	hCoV-19/Mozambique/CERI-KRISP-K026106/2021	EPI_ISL_5942673	2021-07-09	Instituto Nacional de Saude (INS)	CERI, Centre for Epidemic Response and Innvoation, Stellenbosch University and KRISP, KZN Research Innovation and Sequencing Platform, UKZN.	Ismael et al
856	hCoV-19/Mozambique/CERI-KRISP-K026090/2021	EPI_ISL_5942674	2021-07-06	Instituto Nacional de Saude (INS)	CERI, Centre for Epidemic Response and Innvoation, Stellenbosch University and KRISP, KZN Research Innovation and Sequencing Platform, UKZN.	Ismael et al
857	hCoV-19/Mozambique/CERI-KRISP-K026103/2021	EPI_ISL_5942675	2021-06-29	Instituto Nacional de Saude (INS)	CERI, Centre for Epidemic Response and Innvoation, Stellenbosch University and KRISP, KZN Research Innovation and Sequencing Platform, UKZN.	Ismael et al
858	hCoV-19/Mozambique/CERI-KRISP-K026102/2021	EPI_ISL_5942685	2021-07-26	Instituto Nacional de Saude (INS)	CERI, Centre for Epidemic Response and Innvoation, Stellenbosch University and KRISP, KZN Research Innovation and Sequencing Platform, UKZN.	Ismael et al
859	hCoV-19/Mozambique/CERI-KRISP-K026085/2021	EPI_ISL_5942696	2021-07-05	Instituto Nacional de Saude (INS)	CERI, Centre for Epidemic Response and Innvoation, Stellenbosch University and KRISP, KZN Research Innovation and Sequencing Platform, UKZN.	Ismael et al
860	hCoV-19/Mozambique/CERI-KRISP-K026144/2021	EPI_ISL_5942697	2021-07-15	Instituto Nacional de Saude (INS)	CERI, Centre for Epidemic Response and Innvoation, Stellenbosch University and KRISP, KZN Research Innovation and Sequencing Platform, UKZN.	Ismael et al
861	hCoV-19/Mozambique/CERI-KRISP-K026131/2021	EPI_ISL_5942698	2021-07-16	Instituto Nacional de Saude (INS)	CERI, Centre for Epidemic Response and Innvoation, Stellenbosch University and KRISP, KZN Research Innovation and Sequencing Platform, UKZN.	Ismael et al
862	hCoV-19/Mozambique/CERI-KRISP-K026140/2021	EPI_ISL_5942707	2021-07-15	Instituto Nacional de Saude (INS)	CERI, Centre for Epidemic Response and Innvoation, Stellenbosch University and KRISP, KZN Research Innovation and Sequencing Platform, UKZN.	Ismael et al
863	hCoV-19/Mozambique/CERI-KRISP-K026080/2021	EPI_ISL_5942708	2021-07-05	Instituto Nacional de Saude (INS)	CERI, Centre for Epidemic Response and Innvoation, Stellenbosch University and KRISP, KZN Research Innovation and Sequencing Platform, UKZN.	Ismael et al
864	hCoV-19/Mozambique/CERI-KRISP-K026096/2021	EPI_ISL_5942709	2021-06-29	Instituto Nacional de Saude (INS)	CERI, Centre for Epidemic Response and Innvoation, Stellenbosch University and KRISP, KZN Research Innovation and Sequencing Platform, UKZN.	Ismael et al
865	hCoV-19/Mozambique/CERI-KRISP-K026149/2021	EPI_ISL_5942711	2021-07-19	Instituto Nacional de Saude (INS)	CERI, Centre for Epidemic Response and Innvoation, Stellenbosch University and KRISP, KZN Research Innovation and Sequencing Platform, UKZN.	Ismael et al
866	hCoV-19/Mozambique/CERI-KRISP-K026160/2021	EPI_ISL_5942712	2021-07-20	Instituto Nacional de Saude (INS)	CERI, Centre for Epidemic Response and Innvoation, Stellenbosch University and KRISP, KZN Research Innovation and Sequencing Platform, UKZN.	Ismael et al
867	hCoV-19/Mozambique/CERI-KRISP-K026100/2021	EPI_ISL_5942714	2021-07-02	Instituto Nacional de Saude (INS)	CERI, Centre for Epidemic Response and Innvoation, Stellenbosch University and KRISP, KZN Research Innovation and Sequencing Platform, UKZN.	Ismael et al
868	hCoV-19/Mozambique/CERI-KRISP-K026146/2021	EPI_ISL_5942719	2021-07-15	Instituto Nacional de Saude (INS)	CERI, Centre for Epidemic Response and Innvoation, Stellenbosch University and KRISP, KZN Research Innovation and Sequencing Platform, UKZN.	Ismael et al
869	hCoV-19/Mozambique/CERI-KRISP-K026136/2021	EPI_ISL_5942728	2021-07-21	Instituto Nacional de Saude (INS)	CERI, Centre for Epidemic Response and Innvoation, Stellenbosch University and KRISP, KZN Research Innovation and Sequencing Platform, UKZN.	Ismael et al
870	hCoV-19/Mozambique/CERI-KRISP-K026093/2021	EPI_ISL_5942733	2021-06-30	Instituto Nacional de Saude (INS)	CERI, Centre for Epidemic Response and Innvoation, Stellenbosch University and KRISP, KZN Research Innovation and Sequencing Platform, UKZN.	Ismael et al
871	hCoV-19/Mozambique/CERI-KRISP-K026118/2021	EPI_ISL_5942735	2021-07-16	Instituto Nacional de Saude (INS)	CERI, Centre for Epidemic Response and Innvoation, Stellenbosch University and KRISP, KZN Research Innovation and Sequencing Platform, UKZN.	Ismael et al
872	hCoV-19/Mozambique/CERI-KRISP-K026139/2021	EPI_ISL_5942740	2021-07-16	Instituto Nacional de Saude (INS)	CERI, Centre for Epidemic Response and Innvoation, Stellenbosch University and KRISP, KZN Research Innovation and Sequencing Platform, UKZN.	Ismael et al
873	hCoV-19/Mozambique/CERI-KRISP-K026145/2021	EPI_ISL_5942741	2021-07-15	Instituto Nacional de Saude (INS)	CERI, Centre for Epidemic Response and Innvoation, Stellenbosch University and KRISP, KZN Research Innovation and Sequencing Platform, UKZN.	Ismael et al
874	hCoV-19/Mozambique/CERI-KRISP-K026121/2021	EPI_ISL_5942746	2021-07-20	Instituto Nacional de Saude (INS)	CERI, Centre for Epidemic Response and Innvoation, Stellenbosch University and KRISP, KZN Research Innovation and Sequencing Platform, UKZN.	Ismael et al
875	hCoV-19/Mozambique/CERI-KRISP-K026157/2021	EPI_ISL_5942751	2021-07-22	Instituto Nacional de Saude (INS)	CERI, Centre for Epidemic Response and Innvoation, Stellenbosch University and KRISP, KZN Research Innovation and Sequencing Platform, UKZN.	Ismael et al
876	hCoV-19/Mozambique/CERI-KRISP-K026166/2021	EPI_ISL_5942752	2021-07-26	Instituto Nacional de Saude (INS)	CERI, Centre for Epidemic Response and Innvoation, Stellenbosch University and KRISP, KZN Research Innovation and Sequencing Platform, UKZN.	Ismael et al
877	hCoV-19/Mozambique/CERI-KRISP-K026094/2021	EPI_ISL_5942754	2021-06-29	Instituto Nacional de Saude (INS)	CERI, Centre for Epidemic Response and Innvoation, Stellenbosch University and KRISP, KZN Research Innovation and Sequencing Platform, UKZN.	Ismael et al
878	hCoV-19/Mozambique/CERI-KRISP-K026141/2021	EPI_ISL_5942760	2021-07-16	Instituto Nacional de Saude (INS)	CERI, Centre for Epidemic Response and Innvoation, Stellenbosch University and KRISP, KZN Research Innovation and Sequencing Platform, UKZN.	Ismael et al
879	hCoV-19/Mozambique/CERI-KRISP-K026110/2021	EPI_ISL_5942761	2021-07-19	Instituto Nacional de Saude (INS)	CERI, Centre for Epidemic Response and Innvoation, Stellenbosch University and KRISP, KZN Research Innovation and Sequencing Platform, UKZN.	Ismael et al
880	hCoV-19/Mozambique/CERI-KRISP-K026113/2021	EPI_ISL_5942762	2021-07-22	Instituto Nacional de Saude (INS)	CERI, Centre for Epidemic Response and Innvoation, Stellenbosch University and KRISP, KZN Research Innovation and Sequencing Platform, UKZN.	Ismael et al
881	hCoV-19/Mozambique/CERI-KRISP-K026147/2021	EPI_ISL_5942763	2021-07-16	Instituto Nacional de Saude (INS)	CERI, Centre for Epidemic Response and Innvoation, Stellenbosch University and KRISP, KZN Research Innovation and Sequencing Platform, UKZN.	Ismael et al
882	hCoV-19/Mozambique/CERI-KRISP-K026101/2021	EPI_ISL_5942764	2021-07-02	Instituto Nacional de Saude (INS)	CERI, Centre for Epidemic Response and Innvoation, Stellenbosch University and KRISP, KZN Research Innovation and Sequencing Platform, UKZN.	Ismael et al
883	hCoV-19/Mozambique/CERI-KRISP-K026137/2021	EPI_ISL_5942773	2021-07-19	Instituto Nacional de Saude (INS)	CERI, Centre for Epidemic Response and Innvoation, Stellenbosch University and KRISP, KZN Research Innovation and Sequencing Platform, UKZN.	Ismael et al
884	hCoV-19/Mozambique/CERI-KRISP-K026083/2021	EPI_ISL_5942785	2021-07-03	Instituto Nacional de Saude (INS)	CERI, Centre for Epidemic Response and Innvoation, Stellenbosch University and KRISP, KZN Research Innovation and Sequencing Platform, UKZN.	Ismael et al
885	hCoV-19/Mozambique/CERI-KRISP-K026109/2021	EPI_ISL_5942786	2021-07-10	Instituto Nacional de Saude (INS)	CERI, Centre for Epidemic Response and Innvoation, Stellenbosch University and KRISP, KZN Research Innovation and Sequencing Platform, UKZN.	Ismael et al
886	hCoV-19/Mozambique/CERI-KRISP-K026098/2021	EPI_ISL_5942793	2021-07-02	Instituto Nacional de Saude (INS)	CERI, Centre for Epidemic Response and Innvoation, Stellenbosch University and KRISP, KZN Research Innovation and Sequencing Platform, UKZN.	Ismael et al
887	hCoV-19/Mozambique/CERI-KRISP-K026134/2021	EPI_ISL_5942798	2021-07-17	Instituto Nacional de Saude (INS)	CERI, Centre for Epidemic Response and Innvoation, Stellenbosch University and KRISP, KZN Research Innovation and Sequencing Platform, UKZN.	Ismael et al
888	hCoV-19/Mozambique/CERI-KRISP-K026133/2021	EPI_ISL_5942799	2021-07-20	Instituto Nacional de Saude (INS)	CERI, Centre for Epidemic Response and Innvoation, Stellenbosch University and KRISP, KZN Research Innovation and Sequencing Platform, UKZN.	Ismael et al
889	hCoV-19/Mozambique/CERI-KRISP-K026111/2021	EPI_ISL_5942809	2021-07-19	Instituto Nacional de Saude (INS)	CERI, Centre for Epidemic Response and Innvoation, Stellenbosch University and KRISP, KZN Research Innovation and Sequencing Platform, UKZN.	Ismael et al
890	hCoV-19/Mozambique/CERI-KRISP-K026135/2021	EPI_ISL_5942814	2021-07-19	Instituto Nacional de Saude (INS)	CERI, Centre for Epidemic Response and Innvoation, Stellenbosch University and KRISP, KZN Research Innovation and Sequencing Platform, UKZN.	Ismael et al
891	hCoV-19/Mozambique/CERI-KRISP-K026143/2021	EPI_ISL_5942815	2021-07-15	Instituto Nacional de Saude (INS)	CERI, Centre for Epidemic Response and Innvoation, Stellenbosch University and KRISP, KZN Research Innovation and Sequencing Platform, UKZN.	Ismael et al
892	hCoV-19/Mozambique/CERI-KRISP-K026155/2021	EPI_ISL_5942816	2021-07-16	Instituto Nacional de Saude (INS)	CERI, Centre for Epidemic Response and Innvoation, Stellenbosch University and KRISP, KZN Research Innovation and Sequencing Platform, UKZN.	Ismael et al
893	hCoV-19/Mozambique/CERI-KRISP-K026167/2021	EPI_ISL_5942825	2021-07-31	Instituto Nacional de Saude (INS)	CERI, Centre for Epidemic Response and Innvoation, Stellenbosch University and KRISP, KZN Research Innovation and Sequencing Platform, UKZN.	Ismael et al
894	hCoV-19/Mozambique/CERI-KRISP-K026123/2021	EPI_ISL_5942826	2021-07-19	Instituto Nacional de Saude (INS)	CERI, Centre for Epidemic Response and Innvoation, Stellenbosch University and KRISP, KZN Research Innovation and Sequencing Platform, UKZN.	Ismael et al
895	hCoV-19/Mozambique/CERI-KRISP-K026108/2021	EPI_ISL_5942831	2021-07-10	Instituto Nacional de Saude (INS)	CERI, Centre for Epidemic Response and Innvoation, Stellenbosch University and KRISP, KZN Research Innovation and Sequencing Platform, UKZN.	Ismael et al
896	hCoV-19/Mozambique/CERI-KRISP-K026088/2021	EPI_ISL_5942839	2021-07-02	Instituto Nacional de Saude (INS)	CERI, Centre for Epidemic Response and Innvoation, Stellenbosch University and KRISP, KZN Research Innovation and Sequencing Platform, UKZN.	Ismael et al
897	hCoV-19/Mozambique/CERI-KRISP-K026130/2021	EPI_ISL_5942840	2021-07-17	Instituto Nacional de Saude (INS)	CERI, Centre for Epidemic Response and Innvoation, Stellenbosch University and KRISP, KZN Research Innovation and Sequencing Platform, UKZN.	Ismael et al
898	hCoV-19/Mozambique/CERI-KRISP-K014985/2021	EPI_ISL_2492927	2021-01-01	Instituto Nacional de Saude (INS)	CERI, Centre for Epidemic Response and Innvoation, Stellenbosch University and KRISP, KZN Research Innovation and Sequencing Platform, UKZN.	Ismael et al
899	hCoV-19/Mozambique/CERI-KRISP-K014992/2021	EPI_ISL_2492954	2021-03-05	Instituto Nacional de Saude (INS)	CERI, Centre for Epidemic Response and Innvoation, Stellenbosch University and KRISP, KZN Research Innovation and Sequencing Platform, UKZN.	Ismael et al
900	hCoV-19/Mozambique/CERI-KRISP-K014997/2021	EPI_ISL_2492968	2021-03-05	Instituto Nacional de Saude (INS)	CERI, Centre for Epidemic Response and Innvoation, Stellenbosch University and KRISP, KZN Research Innovation and Sequencing Platform, UKZN.	Ismael et al
901	hCoV-19/Mozambique/CERI-KRISP-K014998/2021	EPI_ISL_2492997	2021-03-05	Instituto Nacional de Saude (INS)	CERI, Centre for Epidemic Response and Innvoation, Stellenbosch University and KRISP, KZN Research Innovation and Sequencing Platform, UKZN.	Ismael et al
902	hCoV-19/Mozambique/CERI-KRISP-K030796/2021	EPI_ISL_6795170	2021-09-30	Instituto Nacional de Saude (INS)	CERI, Centre for Epidemic Response and Innvoation, Stellenbosch University and KRISP, KZN Research Innovation and Sequencing Platform, UKZN.	Ismael et al
903	hCoV-19/Mozambique/CERI-KRISP-K030798/2021	EPI_ISL_6795171	2021-10-07	Instituto Nacional de Saude (INS)	CERI, Centre for Epidemic Response and Innvoation, Stellenbosch University and KRISP, KZN Research Innovation and Sequencing Platform, UKZN.	Ismael et al
904	hCoV-19/Mozambique/CERI-KRISP-K030802/2021	EPI_ISL_6795172	2021-10-18	Instituto Nacional de Saude (INS)	CERI, Centre for Epidemic Response and Innvoation, Stellenbosch University and KRISP, KZN Research Innovation and Sequencing Platform, UKZN.	Ismael et al
905	hCoV-19/Mozambique/CERI-KRISP-K030803/2021	EPI_ISL_6795173	2021-10-18	Instituto Nacional de Saude (INS)	CERI, Centre for Epidemic Response and Innvoation, Stellenbosch University and KRISP, KZN Research Innovation and Sequencing Platform, UKZN.	Ismael et al
906	hCoV-19/Mozambique/CERI-KRISP-K030806/2021	EPI_ISL_6795174	2021-08-14	Instituto Nacional de Saude (INS)	CERI, Centre for Epidemic Response and Innvoation, Stellenbosch University and KRISP, KZN Research Innovation and Sequencing Platform, UKZN.	Ismael et al
907	hCoV-19/Mozambique/CERI-KRISP-K030812/2021	EPI_ISL_6795178	2021-09-20	Instituto Nacional de Saude (INS)	CERI, Centre for Epidemic Response and Innvoation, Stellenbosch University and KRISP, KZN Research Innovation and Sequencing Platform, UKZN.	Ismael et al
908	hCoV-19/Mozambique/CERI-KRISP-K030815/2021	EPI_ISL_6795180	2021-09-29	Instituto Nacional de Saude (INS)	CERI, Centre for Epidemic Response and Innvoation, Stellenbosch University and KRISP, KZN Research Innovation and Sequencing Platform, UKZN.	Ismael et al
909	hCoV-19/Mozambique/CERI-KRISP-K030819/2021	EPI_ISL_6795181	2021-08-31	Instituto Nacional de Saude (INS)	CERI, Centre for Epidemic Response and Innvoation, Stellenbosch University and KRISP, KZN Research Innovation and Sequencing Platform, UKZN.	Ismael et al
910	hCoV-19/Mozambique/CERI-KRISP-K030823/2021	EPI_ISL_6795182	2021-08-31	Instituto Nacional de Saude (INS)	CERI, Centre for Epidemic Response and Innvoation, Stellenbosch University and KRISP, KZN Research Innovation and Sequencing Platform, UKZN.	Ismael et al
911	hCoV-19/Mozambique/CERI-KRISP-K030824/2021	EPI_ISL_6795183	2021-08-31	Instituto Nacional de Saude (INS)	CERI, Centre for Epidemic Response and Innvoation, Stellenbosch University and KRISP, KZN Research Innovation and Sequencing Platform, UKZN.	Ismael et al
912	hCoV-19/Mozambique/CERI-KRISP-K030826/2021	EPI_ISL_6795184	2021-09-01	Instituto Nacional de Saude (INS)	CERI, Centre for Epidemic Response and Innvoation, Stellenbosch University and KRISP, KZN Research Innovation and Sequencing Platform, UKZN.	Ismael et al
913	hCoV-19/Mozambique/CERI-KRISP-K030827/2021	EPI_ISL_6795185	2021-09-02	Instituto Nacional de Saude (INS)	CERI, Centre for Epidemic Response and Innvoation, Stellenbosch University and KRISP, KZN Research Innovation and Sequencing Platform, UKZN.	Ismael et al
914	hCoV-19/Mozambique/CERI-KRISP-K030807/2021	EPI_ISL_6795175	2021-08-30	Instituto Nacional de Saude (INS)	CERI, Centre for Epidemic Response and Innvoation, Stellenbosch University and KRISP, KZN Research Innovation and Sequencing Platform, UKZN.	Ismael et al
915	hCoV-19/Mozambique/CERI-KRISP-K030808/2021	EPI_ISL_6795176	2021-09-01	Instituto Nacional de Saude (INS)	CERI, Centre for Epidemic Response and Innvoation, Stellenbosch University and KRISP, KZN Research Innovation and Sequencing Platform, UKZN.	Ismael et al
916	hCoV-19/Mozambique/CERI-KRISP-K030810/2021	EPI_ISL_6795177	2021-09-06	Instituto Nacional de Saude (INS)	CERI, Centre for Epidemic Response and Innvoation, Stellenbosch University and KRISP, KZN Research Innovation and Sequencing Platform, UKZN.	Ismael et al
917	hCoV-19/Mozambique/CERI-KRISP-K030814/2021	EPI_ISL_6795179	2021-09-21	Instituto Nacional de Saude (INS)	CERI, Centre for Epidemic Response and Innvoation, Stellenbosch University and KRISP, KZN Research Innovation and Sequencing Platform, UKZN.	Ismael et al
918	hCoV-19/Mozambique/CERI-KRISP-K030828/2021	EPI_ISL_6795186	2021-09-02	Instituto Nacional de Saude (INS)	CERI, Centre for Epidemic Response and Innvoation, Stellenbosch University and KRISP, KZN Research Innovation and Sequencing Platform, UKZN.	Ismael et al
919	hCoV-19/Mozambique/CERI-KRISP-K030833/2021	EPI_ISL_6795187	2021-09-01	Instituto Nacional de Saude (INS)	CERI, Centre for Epidemic Response and Innvoation, Stellenbosch University and KRISP, KZN Research Innovation and Sequencing Platform, UKZN.	Ismael et al
920	hCoV-19/Mozambique/CERI-KRISP-K032747/2021	EPI_ISL_7715451	2021-11-30	Instituto Nacional de Saude (INS)	CERI, Centre for Epidemic Response and Innvoation, Stellenbosch University and KRISP, KZN Research Innovation and Sequencing Platform, UKZN.	Ismael et al
921	hCoV-19/Mozambique/CERI-KRISP-K032759/2021	EPI_ISL_7715457	2021-11-29	Instituto Nacional de Saude (INS)	CERI, Centre for Epidemic Response and Innvoation, Stellenbosch University and KRISP, KZN Research Innovation and Sequencing Platform, UKZN.	Ismael et al
922	hCoV-19/Mozambique/CERI-KRISP-K032766/2021	EPI_ISL_7715462	2021-11-30	Instituto Nacional de Saude (INS)	CERI, Centre for Epidemic Response and Innvoation, Stellenbosch University and KRISP, KZN Research Innovation and Sequencing Platform, UKZN.	Ismael et al
923	hCoV-19/Mozambique/CERI-KRISP-K032767/2021	EPI_ISL_7715463	2021-11-30	Instituto Nacional de Saude (INS)	CERI, Centre for Epidemic Response and Innvoation, Stellenbosch University and KRISP, KZN Research Innovation and Sequencing Platform, UKZN.	Ismael et al
924	hCoV-19/Mozambique/INS-K011781/2020	EPI_ISL_2396895	2020-08-22	Instituto Nacional de Saude (INS)	KRISP, KZN Research Innovation and Sequencing Platform	Ismael et al
925	hCoV-19/Mozambique/INS-K011852/2021	EPI_ISL_2396957	2021-02-04	Instituto Nacional de Saude (INS)	KRISP, KZN Research Innovation and Sequencing Platform	Ismael et al
926	hCoV-19/Mozambique/INS-K007923/2020	EPI_ISL_887491	2020-12-27	Instituto Nacional de Saude (INS)	KRISP, KZN Research Innovation and Sequencing Platform	Ismael et al
927	hCoV-19/Mozambique/INS-K007931/2020	EPI_ISL_887493	2020-12-18	Instituto Nacional de Saude (INS)	KRISP, KZN Research Innovation and Sequencing Platform	Ismael et al
928	hCoV-19/Mozambique/INS-K007940/2020	EPI_ISL_887499	2020-12-26	Instituto Nacional de Saude (INS)	KRISP, KZN Research Innovation and Sequencing Platform	Ismael et al
929	hCoV-19/Mozambique/INS-K007935/2020	EPI_ISL_887496	2020-12-23	Instituto Nacional de Saude (INS)	KRISP, KZN Research Innovation and Sequencing Platform	Ismael et al
930	hCoV-19/Mozambique/INS-K007924/2020	EPI_ISL_887492	2020-12-27	Instituto Nacional de Saude (INS)	KRISP, KZN Research Innovation and Sequencing Platform	Ismael et al
931	hCoV-19/Mozambique/INS-K007937/2020	EPI_ISL_887497	2020-12-23	Instituto Nacional de Saude (INS)	KRISP, KZN Research Innovation and Sequencing Platform	Ismael et al
932	hCoV-19/Mozambique/INS-K007932/2020	EPI_ISL_887494	2020-12-24	Instituto Nacional de Saude (INS)	KRISP, KZN Research Innovation and Sequencing Platform	Ismael et al
933	hCoV-19/Mozambique/INS-K007938/2020	EPI_ISL_887498	2020-12-23	Instituto Nacional de Saude (INS)	KRISP, KZN Research Innovation and Sequencing Platform	Ismael et al
934	hCoV-19/Mozambique/INS-K007921/2020	EPI_ISL_887490	2020-12-27	Instituto Nacional de Saude (INS)	KRISP, KZN Research Innovation and Sequencing Platform	Ismael et al
935	hCoV-19/Mozambique/INS-K007934/2020	EPI_ISL_887495	2020-12-24	Instituto Nacional de Saude (INS)	KRISP, KZN Research Innovation and Sequencing Platform	Ismael et al
936	hCoV-19/Mozambique/INS-K008012/2021	EPI_ISL_887505	2021-01-05	Instituto Nacional de Saude (INS)	KRISP, KZN Research Innovation and Sequencing Platform	Ismael et al
937	hCoV-19/Mozambique/INS-K008000/2021	EPI_ISL_887504	2021-01-05	Instituto Nacional de Saude (INS)	KRISP, KZN Research Innovation and Sequencing Platform	Ismael et al
938	hCoV-19/Mozambique/INS-K007950/2020	EPI_ISL_887501	2020-09-24	Instituto Nacional de Saude (INS)	KRISP, KZN Research Innovation and Sequencing Platform	Ismael et al
939	hCoV-19/Mozambique/INS-K007925/2020	EPI_ISL_887442	2020-12-26	Instituto Nacional de Saude (INS)	KRISP, KZN Research Innovation and Sequencing Platform	Ismael et al
940	hCoV-19/Mozambique/INS-K007883/2020	EPI_ISL_887438	2020-11-25	Instituto Nacional de Saude (INS)	KRISP, KZN Research Innovation and Sequencing Platform	Ismael et al
941	hCoV-19/Mozambique/INS-K007911/2020	EPI_ISL_887439	2020-12-26	Instituto Nacional de Saude (INS)	KRISP, KZN Research Innovation and Sequencing Platform	Ismael et al
942	hCoV-19/Mozambique/INS-K007922/2020	EPI_ISL_887441	2020-12-26	Instituto Nacional de Saude (INS)	KRISP, KZN Research Innovation and Sequencing Platform	Ismael et al
943	hCoV-19/Mozambique/INS-K007946/2020	EPI_ISL_887500	2020-08-24	Instituto Nacional de Saude (INS)	KRISP, KZN Research Innovation and Sequencing Platform	Ismael et al
944	hCoV-19/Mozambique/INS-K007927/2020	EPI_ISL_887443	2020-12-26	Instituto Nacional de Saude (INS)	KRISP, KZN Research Innovation and Sequencing Platform	Ismael et al
945	hCoV-19/Mozambique/INS-K007971/2020	EPI_ISL_887502	2020-09-05	Instituto Nacional de Saude (INS)	KRISP, KZN Research Innovation and Sequencing Platform	Ismael et al
946	hCoV-19/Mozambique/INS-K007972/2020	EPI_ISL_887503	2020-08-24	Instituto Nacional de Saude (INS)	KRISP, KZN Research Innovation and Sequencing Platform	Ismael et al
947	hCoV-19/Mozambique/INS-K007936/2020	EPI_ISL_887446	2020-12-23	Instituto Nacional de Saude (INS)	KRISP, KZN Research Innovation and Sequencing Platform	Ismael et al
948	hCoV-19/Mozambique/INS-K007989/2021	EPI_ISL_887427	2021-01-07	Instituto Nacional de Saude (INS)	KRISP, KZN Research Innovation and Sequencing Platform	Ismael et al
949	hCoV-19/Mozambique/INS-K007928/2020	EPI_ISL_887444	2020-12-16	Instituto Nacional de Saude (INS)	KRISP, KZN Research Innovation and Sequencing Platform	Ismael et al
950	hCoV-19/Mozambique/INS-K007976/2021	EPI_ISL_887448	2021-01-07	Instituto Nacional de Saude (INS)	KRISP, KZN Research Innovation and Sequencing Platform	Ismael et al
951	hCoV-19/Mozambique/INS-K007913/2020	EPI_ISL_887428	2020-12-26	Instituto Nacional de Saude (INS)	KRISP, KZN Research Innovation and Sequencing Platform	Ismael et al
952	hCoV-19/Mozambique/INS-K007930/2020	EPI_ISL_887445	2020-12-14	Instituto Nacional de Saude (INS)	KRISP, KZN Research Innovation and Sequencing Platform	Ismael et al
953	hCoV-19/Mozambique/INS-K007918/2020	EPI_ISL_887440	2020-12-27	Instituto Nacional de Saude (INS)	KRISP, KZN Research Innovation and Sequencing Platform	Ismael et al
954	hCoV-19/Mozambique/INS-K007939/2020	EPI_ISL_887447	2020-12-26	Instituto Nacional de Saude (INS)	KRISP, KZN Research Innovation and Sequencing Platform	Ismael et al
955	hCoV-19/Mozambique/INS-K007986/2021	EPI_ISL_887433	2021-01-07	Instituto Nacional de Saude (INS)	KRISP, KZN Research Innovation and Sequencing Platform	Ismael et al
956	hCoV-19/Mozambique/INS-K007882/2020	EPI_ISL_887435	2020-11-26	Instituto Nacional de Saude (INS)	KRISP, KZN Research Innovation and Sequencing Platform	Ismael et al
957	hCoV-19/Mozambique/INS-K007974/2020	EPI_ISL_887429	2020-08-24	Instituto Nacional de Saude (INS)	KRISP, KZN Research Innovation and Sequencing Platform	Ismael et al
958	hCoV-19/Mozambique/INS-K007991/2021	EPI_ISL_887430	2021-01-05	Instituto Nacional de Saude (INS)	KRISP, KZN Research Innovation and Sequencing Platform	Ismael et al
959	hCoV-19/Mozambique/INS-K007959/2020	EPI_ISL_887431	2020-09-24	Instituto Nacional de Saude (INS)	KRISP, KZN Research Innovation and Sequencing Platform	Ismael et al
960	hCoV-19/Mozambique/INS-K007957/2020	EPI_ISL_887434	2020-09-28	Instituto Nacional de Saude (INS)	KRISP, KZN Research Innovation and Sequencing Platform	Ismael et al
961	hCoV-19/Mozambique/INS-K007875/2020	EPI_ISL_887436	2020-11-25	Instituto Nacional de Saude (INS)	KRISP, KZN Research Innovation and Sequencing Platform	Ismael et al
962	hCoV-19/Mozambique/INS-K007983/2021	EPI_ISL_887432	2021-01-07	Instituto Nacional de Saude (INS)	KRISP, KZN Research Innovation and Sequencing Platform	Ismael et al
963	hCoV-19/Mozambique/INS-K007945/2020	EPI_ISL_887420	2020-09-05	Instituto Nacional de Saude (INS)	KRISP, KZN Research Innovation and Sequencing Platform	Ismael et al
964	hCoV-19/Mozambique/INS-K007929/2020	EPI_ISL_887437	2020-12-17	Instituto Nacional de Saude (INS)	KRISP, KZN Research Innovation and Sequencing Platform	Ismael et al
965	hCoV-19/Mozambique/INS-K007980/2021	EPI_ISL_887419	2021-01-06	Instituto Nacional de Saude (INS)	KRISP, KZN Research Innovation and Sequencing Platform	Ismael et al
966	hCoV-19/Mozambique/INS-K007933/2020	EPI_ISL_887424	2020-12-23	Instituto Nacional de Saude (INS)	KRISP, KZN Research Innovation and Sequencing Platform	Ismael et al
967	hCoV-19/Mozambique/INS-K007956/2020	EPI_ISL_887421	2020-08-15	Instituto Nacional de Saude (INS)	KRISP, KZN Research Innovation and Sequencing Platform	Ismael et al
968	hCoV-19/Mozambique/INS-K007880/2020	EPI_ISL_887425	2020-11-23	Instituto Nacional de Saude (INS)	KRISP, KZN Research Innovation and Sequencing Platform	Ismael et al
969	hCoV-19/Mozambique/INS-K007979/2021	EPI_ISL_887422	2021-01-07	Instituto Nacional de Saude (INS)	KRISP, KZN Research Innovation and Sequencing Platform	Ismael et al
970	hCoV-19/Mozambique/INS-K008001/2021	EPI_ISL_887423	2021-01-07	Instituto Nacional de Saude (INS)	KRISP, KZN Research Innovation and Sequencing Platform	Ismael et al
971	hCoV-19/Mozambique/INS-K007969/2020	EPI_ISL_887426	2020-09-08	Instituto Nacional de Saude (INS)	KRISP, KZN Research Innovation and Sequencing Platform	Ismael et al
972	hCoV-19/Mozambique/INS-K007917/2020	EPI_ISL_887487	2020-12-28	Instituto Nacional de Saude (INS)	KRISP, KZN Research Innovation and Sequencing Platform	Ismael et al
973	hCoV-19/Mozambique/INS-K007919/2020	EPI_ISL_887488	2020-12-27	Instituto Nacional de Saude (INS)	KRISP, KZN Research Innovation and Sequencing Platform	Ismael et al
974	hCoV-19/Mozambique/INS-K007912/2020	EPI_ISL_887483	2020-12-26	Instituto Nacional de Saude (INS)	KRISP, KZN Research Innovation and Sequencing Platform	Ismael et al
975	hCoV-19/Mozambique/INS-K007904/2020	EPI_ISL_887476	2020-12-03	Instituto Nacional de Saude (INS)	KRISP, KZN Research Innovation and Sequencing Platform	Ismael et al
976	hCoV-19/Mozambique/INS-K007907/2020	EPI_ISL_887479	2020-12-06	Instituto Nacional de Saude (INS)	KRISP, KZN Research Innovation and Sequencing Platform	Ismael et al
977	hCoV-19/Mozambique/INS-K007900/2020	EPI_ISL_887474	2020-12-15	Instituto Nacional de Saude (INS)	KRISP, KZN Research Innovation and Sequencing Platform	Ismael et al
978	hCoV-19/Mozambique/INS-K007915/2020	EPI_ISL_887485	2020-12-24	Instituto Nacional de Saude (INS)	KRISP, KZN Research Innovation and Sequencing Platform	Ismael et al
979	hCoV-19/Mozambique/INS-K007909/2020	EPI_ISL_887481	2020-12-06	Instituto Nacional de Saude (INS)	KRISP, KZN Research Innovation and Sequencing Platform	Ismael et al
980	hCoV-19/Mozambique/INS-K007916/2020	EPI_ISL_887486	2020-12-28	Instituto Nacional de Saude (INS)	KRISP, KZN Research Innovation and Sequencing Platform	Ismael et al
981	hCoV-19/Mozambique/INS-K007920/2020	EPI_ISL_887489	2020-12-27	Instituto Nacional de Saude (INS)	KRISP, KZN Research Innovation and Sequencing Platform	Ismael et al
982	hCoV-19/Mozambique/INS-K007896/2020	EPI_ISL_887470	2020-12-14	Instituto Nacional de Saude (INS)	KRISP, KZN Research Innovation and Sequencing Platform	Ismael et al
983	hCoV-19/Mozambique/INS-K007898/2020	EPI_ISL_887472	2020-12-16	Instituto Nacional de Saude (INS)	KRISP, KZN Research Innovation and Sequencing Platform	Ismael et al
984	hCoV-19/Mozambique/INS-K007893/2020	EPI_ISL_887467	2020-12-06	Instituto Nacional de Saude (INS)	KRISP, KZN Research Innovation and Sequencing Platform	Ismael et al
985	hCoV-19/Mozambique/INS-K007908/2020	EPI_ISL_887480	2020-12-05	Instituto Nacional de Saude (INS)	KRISP, KZN Research Innovation and Sequencing Platform	Ismael et al
986	hCoV-19/Mozambique/INS-K007910/2020	EPI_ISL_887482	2020-12-26	Instituto Nacional de Saude (INS)	KRISP, KZN Research Innovation and Sequencing Platform	Ismael et al
987	hCoV-19/Mozambique/INS-K007906/2020	EPI_ISL_887478	2020-12-06	Instituto Nacional de Saude (INS)	KRISP, KZN Research Innovation and Sequencing Platform	Ismael et al
988	hCoV-19/Mozambique/INS-K007889/2020	EPI_ISL_887464	2020-11-25	Instituto Nacional de Saude (INS)	KRISP, KZN Research Innovation and Sequencing Platform	Ismael et al
989	hCoV-19/Mozambique/INS-K007914/2020	EPI_ISL_887484	2020-12-26	Instituto Nacional de Saude (INS)	KRISP, KZN Research Innovation and Sequencing Platform	Ismael et al
990	hCoV-19/Mozambique/INS-K007902/2020	EPI_ISL_887475	2020-12-15	Instituto Nacional de Saude (INS)	KRISP, KZN Research Innovation and Sequencing Platform	Ismael et al
991	hCoV-19/Mozambique/INS-K007892/2020	EPI_ISL_887466	2020-12-03	Instituto Nacional de Saude (INS)	KRISP, KZN Research Innovation and Sequencing Platform	Ismael et al
992	hCoV-19/Mozambique/INS-K007985/2021	EPI_ISL_887452	2021-01-07	Instituto Nacional de Saude (INS)	KRISP, KZN Research Innovation and Sequencing Platform	Ismael et al
993	hCoV-19/Mozambique/INS-K007888/2020	EPI_ISL_887463	2020-11-23	Instituto Nacional de Saude (INS)	KRISP, KZN Research Innovation and Sequencing Platform	Ismael et al
994	hCoV-19/Mozambique/INS-K007894/2020	EPI_ISL_887468	2020-12-04	Instituto Nacional de Saude (INS)	KRISP, KZN Research Innovation and Sequencing Platform	Ismael et al
995	hCoV-19/Mozambique/INS-K007905/2020	EPI_ISL_887477	2020-12-04	Instituto Nacional de Saude (INS)	KRISP, KZN Research Innovation and Sequencing Platform	Ismael et al
996	hCoV-19/Mozambique/INS-K007897/2020	EPI_ISL_887471	2020-12-14	Instituto Nacional de Saude (INS)	KRISP, KZN Research Innovation and Sequencing Platform	Ismael et al
997	hCoV-19/Mozambique/INS-K007891/2020	EPI_ISL_887465	2020-11-23	Instituto Nacional de Saude (INS)	KRISP, KZN Research Innovation and Sequencing Platform	Ismael et al
998	hCoV-19/Mozambique/INS-K007878/2020	EPI_ISL_887458	2020-11-24	Instituto Nacional de Saude (INS)	KRISP, KZN Research Innovation and Sequencing Platform	Ismael et al
999	hCoV-19/Mozambique/INS-K007899/2020	EPI_ISL_887473	2020-12-05	Instituto Nacional de Saude (INS)	KRISP, KZN Research Innovation and Sequencing Platform	Ismael et al
1000	hCoV-19/Mozambique/INS-K007895/2020	EPI_ISL_887469	2020-12-14	Instituto Nacional de Saude (INS)	KRISP, KZN Research Innovation and Sequencing Platform	Ismael et al
1001	hCoV-19/Mozambique/INS-K007885/2020	EPI_ISL_887460	2020-11-24	Instituto Nacional de Saude (INS)	KRISP, KZN Research Innovation and Sequencing Platform	Ismael et al
1002	hCoV-19/Mozambique/INS-K007886/2020	EPI_ISL_887461	2020-11-23	Instituto Nacional de Saude (INS)	KRISP, KZN Research Innovation and Sequencing Platform	Ismael et al
1003	hCoV-19/Mozambique/INS-K007981/2021	EPI_ISL_887450	2021-01-06	Instituto Nacional de Saude (INS)	KRISP, KZN Research Innovation and Sequencing Platform	Ismael et al
1004	hCoV-19/Mozambique/INS-K007887/2020	EPI_ISL_887462	2020-11-23	Instituto Nacional de Saude (INS)	KRISP, KZN Research Innovation and Sequencing Platform	Ismael et al
1005	hCoV-19/Mozambique/INS-K007977/2021	EPI_ISL_887449	2021-01-07	Instituto Nacional de Saude (INS)	KRISP, KZN Research Innovation and Sequencing Platform	Ismael et al
1006	hCoV-19/Mozambique/INS-K007873/2020	EPI_ISL_887455	2020-11-24	Instituto Nacional de Saude (INS)	KRISP, KZN Research Innovation and Sequencing Platform	Ismael et al
1007	hCoV-19/Mozambique/INS-K007874/2020	EPI_ISL_887456	2020-11-25	Instituto Nacional de Saude (INS)	KRISP, KZN Research Innovation and Sequencing Platform	Ismael et al
1008	hCoV-19/Mozambique/INS-K007988/2021	EPI_ISL_887453	2021-01-07	Instituto Nacional de Saude (INS)	KRISP, KZN Research Innovation and Sequencing Platform	Ismael et al
1009	hCoV-19/Mozambique/INS-K007984/2021	EPI_ISL_887451	2021-01-07	Instituto Nacional de Saude (INS)	KRISP, KZN Research Innovation and Sequencing Platform	Ismael et al
1010	hCoV-19/Mozambique/INS-K007999/2021	EPI_ISL_887454	2021-01-07	Instituto Nacional de Saude (INS)	KRISP, KZN Research Innovation and Sequencing Platform	Ismael et al
1011	hCoV-19/Mozambique/INS-K007876/2020	EPI_ISL_887457	2020-11-24	Instituto Nacional de Saude (INS)	KRISP, KZN Research Innovation and Sequencing Platform	Ismael et al
1012	hCoV-19/Mozambique/INS-K007879/2020	EPI_ISL_887459	2020-11-25	Instituto Nacional de Saude (INS)	KRISP, KZN Research Innovation and Sequencing Platform	Ismael et al
1013	hCoV-19/Mozambique/INS-K008136/2021	EPI_ISL_964944	2021-01-15	Instituto Nacional de Saude (INS)	KRISP, KZN Research Innovation and Sequencing Platform	Ismael et al
1014	hCoV-19/Mozambique/KRISP-MZ154276/2020	EPI_ISL_636979	2020-07-07	HP Pemba	KRISP, KZN Research Innovation and Sequencing Platform	Ismael et al
1015	hCoV-19/Mozambique/KRISP-MZ155093/2020	EPI_ISL_636981	2020-07-06	City of Chimoio	KRISP, KZN Research Innovation and Sequencing Platform	Ismael et al
1016	hCoV-19/Mozambique/KRISP-MZ158905/2020	EPI_ISL_636980	2020-07-14	CS Xai Xai	KRISP, KZN Research Innovation and Sequencing Platform	Ismael et al
1017	hCoV-19/Mozambique/KRISP-MZ158971/2020	EPI_ISL_636976	2020-07-13	HP Pemba	KRISP, KZN Research Innovation and Sequencing Platform	Ismael et al
1018	hCoV-19/Mozambique/KRISP-MZ154278/2020	EPI_ISL_636975	2020-07-07	HP Pemba	KRISP, KZN Research Innovation and Sequencing Platform	Ismael et al
1019	hCoV-19/Mozambique/KRISP-MZ157469/2020	EPI_ISL_636977	2020-07-11	HP Pemba	KRISP, KZN Research Innovation and Sequencing Platform	Ismael et al
1020	hCoV-19/Mozambique/KRISP-MZ157470/2020	EPI_ISL_636978	2020-07-11	HP Pemba	KRISP, KZN Research Innovation and Sequencing Platform	Ismael et al
1021	hCoV-19/Mozambique/PXA0162793/2021	EPI_ISL_11162467	2021-12-13	Biotecnology and Genetics Laboratory - Instituto Nacional de Sa├║de	Biotecnology and Genetics Laboratory - Instituto Nacional de Sa├║de	Viegas et al
1022	hCoV-19/Mozambique/B-12/14/2021	EPI_ISL_11162468	2021-12-14	Biotecnology and Genetics Laboratory - Instituto Nacional de Sa├║de	Biotecnology and Genetics Laboratory - Instituto Nacional de Sa├║de	Viegas et al
1023	hCoV-19/Mozambique/PCM0156450/2021	EPI_ISL_11162469	2021-12-14	Biotecnology and Genetics Laboratory - Instituto Nacional de Sa├║de	Biotecnology and Genetics Laboratory - Instituto Nacional de Sa├║de	Viegas et al
1024	hCoV-19/Mozambique/PDD0037921/2021	EPI_ISL_11162470	2021-12-15	Biotecnology and Genetics Laboratory - Instituto Nacional de Sa├║de	Biotecnology and Genetics Laboratory - Instituto Nacional de Sa├║de	Viegas et al
1025	hCoV-19/Mozambique/5498/2021	EPI_ISL_11162471	2021-12-21	Biotecnology and Genetics Laboratory - Instituto Nacional de Sa├║de	Biotecnology and Genetics Laboratory - Instituto Nacional de Sa├║de	Viegas et al
1026	hCoV-19/Mozambique/PDD0037955/2021	EPI_ISL_11162472	2021-12-21	Biotecnology and Genetics Laboratory - Instituto Nacional de Sa├║de	Biotecnology and Genetics Laboratory - Instituto Nacional de Sa├║de	Viegas et al
1027	hCoV-19/Mozambique/PTC0071676/2021	EPI_ISL_11162473	2021-12-22	Biotecnology and Genetics Laboratory - Instituto Nacional de Sa├║de	Biotecnology and Genetics Laboratory - Instituto Nacional de Sa├║de	Viegas et al
1028	hCoV-19/Mozambique/5473/2021	EPI_ISL_11162474	2021-12-23	Biotecnology and Genetics Laboratory - Instituto Nacional de Sa├║de	Biotecnology and Genetics Laboratory - Instituto Nacional de Sa├║de	Viegas et al
1029	hCoV-19/Mozambique/5647/2021	EPI_ISL_11162475	2021-12-23	Biotecnology and Genetics Laboratory - Instituto Nacional de Sa├║de	Biotecnology and Genetics Laboratory - Instituto Nacional de Sa├║de	Viegas et al
1030	hCoV-19/Mozambique/PDD0038106/2021	EPI_ISL_11162476	2021-12-24	Biotecnology and Genetics Laboratory - Instituto Nacional de Sa├║de	Biotecnology and Genetics Laboratory - Instituto Nacional de Sa├║de	Viegas et al
1031	hCoV-19/Mozambique/CVDNS45733/2021	EPI_ISL_11162477	2021-12-27	Biotecnology and Genetics Laboratory - Instituto Nacional de Sa├║de	Biotecnology and Genetics Laboratory - Instituto Nacional de Sa├║de	Viegas et al
1032	hCoV-19/Mozambique/CVDNS45734/2021	EPI_ISL_11162478	2021-12-27	Biotecnology and Genetics Laboratory - Instituto Nacional de Sa├║de	Biotecnology and Genetics Laboratory - Instituto Nacional de Sa├║de	Viegas et al
1033	hCoV-19/Mozambique/PIM0014511-A8/2022	EPI_ISL_11162479	2022-01-06	Biotecnology and Genetics Laboratory - Instituto Nacional de Sa├║de	Biotecnology and Genetics Laboratory - Instituto Nacional de Sa├║de	Viegas et al
1034	hCoV-19/Mozambique/PQM1089719/2021	EPI_ISL_11325752	2021-12-07	Biotecnology and Genetics Laboratory - Instituto Nacional de Sa├║de	Biotecnology and Genetics Laboratory - Instituto Nacional de Sa├║de	Viegas et al
1035	hCoV-19/Mozambique/B-10/11/2021	EPI_ISL_11325753	2021-12-11	Biotecnology and Genetics Laboratory - Instituto Nacional de Sa├║de	Biotecnology and Genetics Laboratory - Instituto Nacional de Sa├║de	Viegas et al
1036	hCoV-19/Mozambique/B-19/11/2021	EPI_ISL_11325754	2021-12-11	Biotecnology and Genetics Laboratory - Instituto Nacional de Sa├║de	Biotecnology and Genetics Laboratory - Instituto Nacional de Sa├║de	Viegas et al
1037	hCoV-19/Mozambique/CN-25/13/2021	EPI_ISL_11325755	2021-12-13	Biotecnology and Genetics Laboratory - Instituto Nacional de Sa├║de	Biotecnology and Genetics Laboratory - Instituto Nacional de Sa├║de	Viegas et al
1038	hCoV-19/Mozambique/AZ-8/14/2021	EPI_ISL_11325756	2021-12-14	Biotecnology and Genetics Laboratory - Instituto Nacional de Sa├║de	Biotecnology and Genetics Laboratory - Instituto Nacional de Sa├║de	Viegas et al
1039	hCoV-19/Mozambique/CN-15/14/2021	EPI_ISL_11325757	2021-12-14	Biotecnology and Genetics Laboratory - Instituto Nacional de Sa├║de	Biotecnology and Genetics Laboratory - Instituto Nacional de Sa├║de	Viegas et al
1040	hCoV-19/Mozambique/PTC0070997/2021	EPI_ISL_11325758	2021-12-14	Biotecnology and Genetics Laboratory - Instituto Nacional de Sa├║de	Biotecnology and Genetics Laboratory - Instituto Nacional de Sa├║de	Viegas et al
1041	hCoV-19/Mozambique/PCM0156464/2021	EPI_ISL_11325759	2021-12-16	Biotecnology and Genetics Laboratory - Instituto Nacional de Sa├║de	Biotecnology and Genetics Laboratory - Instituto Nacional de Sa├║de	Viegas et al
1042	hCoV-19/Mozambique/PTC0071599/2021	EPI_ISL_11325760	2021-12-16	Biotecnology and Genetics Laboratory - Instituto Nacional de Sa├║de	Biotecnology and Genetics Laboratory - Instituto Nacional de Sa├║de	Viegas et al
1043	hCoV-19/Mozambique/PMB0563117/2021	EPI_ISL_11325761	2021-12-20	Biotecnology and Genetics Laboratory - Instituto Nacional de Sa├║de	Biotecnology and Genetics Laboratory - Instituto Nacional de Sa├║de	Viegas et al
1044	hCoV-19/Mozambique/PXA0163594/2021	EPI_ISL_11325762	2021-12-22	Biotecnology and Genetics Laboratory - Instituto Nacional de Sa├║de	Biotecnology and Genetics Laboratory - Instituto Nacional de Sa├║de	Viegas et al
1045	hCoV-19/Mozambique/PXA0163590/2021	EPI_ISL_11325763	2021-12-23	Biotecnology and Genetics Laboratory - Instituto Nacional de Sa├║de	Biotecnology and Genetics Laboratory - Instituto Nacional de Sa├║de	Viegas et al
1046	hCoV-19/Mozambique/CVDNS45736/2021	EPI_ISL_11325764	2021-12-27	Biotecnology and Genetics Laboratory - Instituto Nacional de Sa├║de	Biotecnology and Genetics Laboratory - Instituto Nacional de Sa├║de	Viegas et al
1047	hCoV-19/Mozambique/7095-A161/2022	EPI_ISL_11325765	2022-01-03	Biotecnology and Genetics Laboratory - Instituto Nacional de Sa├║de	Biotecnology and Genetics Laboratory - Instituto Nacional de Sa├║de	Viegas et al
1048	hCoV-19/Mozambique/PTC0073014-A164/2022	EPI_ISL_11325766	2022-01-08	Biotecnology and Genetics Laboratory - Instituto Nacional de Sa├║de	Biotecnology and Genetics Laboratory - Instituto Nacional de Sa├║de	Viegas et al
1049	hCoV-19/Mozambique/PDD0038946-A17/2022	EPI_ISL_11325767	2022-01-08	Biotecnology and Genetics Laboratory - Instituto Nacional de Sa├║de	Biotecnology and Genetics Laboratory - Instituto Nacional de Sa├║de	Viegas et al
1050	hCoV-19/Mozambique/PCM0158945-A4/2022	EPI_ISL_11325768	2022-01-06	Biotecnology and Genetics Laboratory - Instituto Nacional de Sa├║de	Biotecnology and Genetics Laboratory - Instituto Nacional de Sa├║de	Viegas et al
1051	hCoV-19/Mozambique/CVDNS46047-A172/2022	EPI_ISL_11325769	2022-01-04	Biotecnology and Genetics Laboratory - Instituto Nacional de Sa├║de	Biotecnology and Genetics Laboratory - Instituto Nacional de Sa├║de	Viegas et al
1052	hCoV-19/Mozambique/239-A13/2022	EPI_ISL_11325770	2022-01-11	Biotecnology and Genetics Laboratory - Instituto Nacional de Sa├║de	Biotecnology and Genetics Laboratory - Instituto Nacional de Sa├║de	Viegas et al
1053	hCoV-19/Mozambique/PIM0014514-A11/2022	EPI_ISL_11325771	2022-01-07	Biotecnology and Genetics Laboratory - Instituto Nacional de Sa├║de	Biotecnology and Genetics Laboratory - Instituto Nacional de Sa├║de	Viegas et al
1054	hCoV-19/Mozambique/PIM0014512-A9/2022	EPI_ISL_11325772	2022-01-06	Biotecnology and Genetics Laboratory - Instituto Nacional de Sa├║de	Biotecnology and Genetics Laboratory - Instituto Nacional de Sa├║de	Viegas et al
1055	hCoV-19/Mozambique/6814-A163/2022	EPI_ISL_11325773	2022-01-03	Biotecnology and Genetics Laboratory - Instituto Nacional de Sa├║de	Biotecnology and Genetics Laboratory - Instituto Nacional de Sa├║de	Viegas et al
1056	hCoV-19/Mozambique/B-17/11/2021	EPI_ISL_11325774	2021-12-11	Biotecnology and Genetics Laboratory - Instituto Nacional de Sa├║de	Biotecnology and Genetics Laboratory - Instituto Nacional de Sa├║de	Viegas et al
1057	hCoV-19/Mozambique/B-13/11/2021	EPI_ISL_11325775	2021-12-11	Biotecnology and Genetics Laboratory - Instituto Nacional de Sa├║de	Biotecnology and Genetics Laboratory - Instituto Nacional de Sa├║de	Viegas et al
1058	hCoV-19/Mozambique/N10/13/2021	EPI_ISL_11325776	2021-12-13	Biotecnology and Genetics Laboratory - Instituto Nacional de Sa├║de	Biotecnology and Genetics Laboratory - Instituto Nacional de Sa├║de	Viegas et al
1059	hCoV-19/Mozambique/PNV0069732/2021	EPI_ISL_11325777	2021-12-16	Biotecnology and Genetics Laboratory - Instituto Nacional de Sa├║de	Biotecnology and Genetics Laboratory - Instituto Nacional de Sa├║de	Viegas et al
1060	hCoV-19/Mozambique/PNV0074354-A171/2022	EPI_ISL_11325778	2022-01-13	Biotecnology and Genetics Laboratory - Instituto Nacional de Sa├║de	Biotecnology and Genetics Laboratory - Instituto Nacional de Sa├║de	Viegas et al
1061	hCoV-19/Mozambique/PIM0014513-A10/2022	EPI_ISL_11325779	2022-01-06	Biotecnology and Genetics Laboratory - Instituto Nacional de Sa├║de	Biotecnology and Genetics Laboratory - Instituto Nacional de Sa├║de	Viegas et al
1062	hCoV-19/Mozambique/PNV0073581-A169/2022	EPI_ISL_11325780	2022-01-05	Biotecnology and Genetics Laboratory - Instituto Nacional de Sa├║de	Biotecnology and Genetics Laboratory - Instituto Nacional de Sa├║de	Viegas et al
1063	hCoV-19/Mozambique/PCM0158954-A5/2022	EPI_ISL_11325781	2022-01-06	Biotecnology and Genetics Laboratory - Instituto Nacional de Sa├║de	Biotecnology and Genetics Laboratory - Instituto Nacional de Sa├║de	Viegas et al
1064	hCoV-19/Mozambique/CVDNS46045-A1/2022	EPI_ISL_11325782	2022-01-03	Biotecnology and Genetics Laboratory - Instituto Nacional de Sa├║de	Biotecnology and Genetics Laboratory - Instituto Nacional de Sa├║de	Viegas et al
1065	hCoV-19/Mozambique/PTC0073002-A165/2022	EPI_ISL_11325783	2022-01-02	Biotecnology and Genetics Laboratory - Instituto Nacional de Sa├║de	Biotecnology and Genetics Laboratory - Instituto Nacional de Sa├║de	Viegas et al
1066	hCoV-19/Mozambique/PXM0163853-A154/2021	EPI_ISL_11325784	2021-12-30	Biotecnology and Genetics Laboratory - Instituto Nacional de Sa├║de	Biotecnology and Genetics Laboratory - Instituto Nacional de Sa├║de	Viegas et al
1067	hCoV-19/Mozambique/PDD0037771-A18/2022	EPI_ISL_11325785	2022-01-03	Biotecnology and Genetics Laboratory - Instituto Nacional de Sa├║de	Biotecnology and Genetics Laboratory - Instituto Nacional de Sa├║de	Viegas et al
1068	hCoV-19/Mozambique/PNV0073394-A168/2022	EPI_ISL_11325786	2022-01-08	Biotecnology and Genetics Laboratory - Instituto Nacional de Sa├║de	Biotecnology and Genetics Laboratory - Instituto Nacional de Sa├║de	Viegas et al
1069	hCoV-19/Mozambique/CVDNS46053-A3/2022	EPI_ISL_11325787	2022-01-03	Biotecnology and Genetics Laboratory - Instituto Nacional de Sa├║de	Biotecnology and Genetics Laboratory - Instituto Nacional de Sa├║de	Viegas et al
1070	hCoV-19/Mozambique/6826-A160/2022	EPI_ISL_11325788	2022-01-03	Biotecnology and Genetics Laboratory - Instituto Nacional de Sa├║de	Biotecnology and Genetics Laboratory - Instituto Nacional de Sa├║de	Viegas et al
1071	hCoV-19/Mozambique/CVDNS46050-A2/2022	EPI_ISL_11325789	2022-01-03	Biotecnology and Genetics Laboratory - Instituto Nacional de Sa├║de	Biotecnology and Genetics Laboratory - Instituto Nacional de Sa├║de	Viegas et al
1072	hCoV-19/Mozambique/PXM0163996-A152/2022	EPI_ISL_11325790	2022-01-04	Biotecnology and Genetics Laboratory - Instituto Nacional de Sa├║de	Biotecnology and Genetics Laboratory - Instituto Nacional de Sa├║de	Viegas et al
1073	hCoV-19/Mozambique/PTC0073094-A166/2021	EPI_ISL_11325791	2021-12-31	Biotecnology and Genetics Laboratory - Instituto Nacional de Sa├║de	Biotecnology and Genetics Laboratory - Instituto Nacional de Sa├║de	Viegas et al
1074	hCoV-19/Mozambique/PCM0158964-A6/2022	EPI_ISL_11325792	2022-01-04	Biotecnology and Genetics Laboratory - Instituto Nacional de Sa├║de	Biotecnology and Genetics Laboratory - Instituto Nacional de Sa├║de	Viegas et al
1075	hCoV-19/Mozambique/PTC0071664/2021	EPI_ISL_11325793	2021-12-21	Biotecnology and Genetics Laboratory - Instituto Nacional de Sa├║de	Biotecnology and Genetics Laboratory - Instituto Nacional de Sa├║de	Viegas et al
1076	hCoV-19/Mozambique/1242-A157/2022	EPI_ISL_11325794	2022-01-04	Biotecnology and Genetics Laboratory - Instituto Nacional de Sa├║de	Biotecnology and Genetics Laboratory - Instituto Nacional de Sa├║de	Viegas et al
1077	hCoV-19/Mozambique/PDD0038923-A19/2022	EPI_ISL_11325795	2022-01-06	Biotecnology and Genetics Laboratory - Instituto Nacional de Sa├║de	Biotecnology and Genetics Laboratory - Instituto Nacional de Sa├║de	Viegas et al
1078	hCoV-19/Mozambique/PXM0163989-A153/2022	EPI_ISL_11325796	2022-01-04	Biotecnology and Genetics Laboratory - Instituto Nacional de Sa├║de	Biotecnology and Genetics Laboratory - Instituto Nacional de Sa├║de	Viegas et al
1079	hCoV-19/Mozambique/PDD0038932-A20/2022	EPI_ISL_11325797	2022-01-07	Biotecnology and Genetics Laboratory - Instituto Nacional de Sa├║de	Biotecnology and Genetics Laboratory - Instituto Nacional de Sa├║de	Viegas et al
1080	hCoV-19/Mozambique/108-A12/2022	EPI_ISL_11325798	2022-01-06	Biotecnology and Genetics Laboratory - Instituto Nacional de Sa├║de	Biotecnology and Genetics Laboratory - Instituto Nacional de Sa├║de	Viegas et al
1081	hCoV-19/Mozambique/1237-A158/2022	EPI_ISL_11325799	2022-01-04	Biotecnology and Genetics Laboratory - Instituto Nacional de Sa├║de	Biotecnology and Genetics Laboratory - Instituto Nacional de Sa├║de	Viegas et al
1082	hCoV-19/Mozambique/CERI-KRISP-K037880/2022	EPI_ISL_11621056	2022-01-14	Instituto Nacional de Saude (INS)	CERI, Centre for Epidemic Response and Innovation, Stellenbosch University and KRISP, KZN Research Innovation and Sequencing Platform, UKZN.	Ismael et al
1083	hCoV-19/Mozambique/CERI-KRISP-K037881/2022	EPI_ISL_11621057	2022-01-14	Instituto Nacional de Saude (INS)	CERI, Centre for Epidemic Response and Innovation, Stellenbosch University and KRISP, KZN Research Innovation and Sequencing Platform, UKZN.	Ismael et al
1084	hCoV-19/Mozambique/CERI-KRISP-K037882/2022	EPI_ISL_11621058	2022-01-17	Instituto Nacional de Saude (INS)	CERI, Centre for Epidemic Response and Innovation, Stellenbosch University and KRISP, KZN Research Innovation and Sequencing Platform, UKZN.	Ismael et al
1085	hCoV-19/Mozambique/CERI-KRISP-K037883/2022	EPI_ISL_11621059	2022-01-19	Instituto Nacional de Saude (INS)	CERI, Centre for Epidemic Response and Innovation, Stellenbosch University and KRISP, KZN Research Innovation and Sequencing Platform, UKZN.	Ismael et al
1086	hCoV-19/Mozambique/CERI-KRISP-K037884/2022	EPI_ISL_11621060	2022-01-20	Instituto Nacional de Saude (INS)	CERI, Centre for Epidemic Response and Innovation, Stellenbosch University and KRISP, KZN Research Innovation and Sequencing Platform, UKZN.	Ismael et al
1087	hCoV-19/Mozambique/CERI-KRISP-K037885/2022	EPI_ISL_11621061	2022-01-19	Instituto Nacional de Saude (INS)	CERI, Centre for Epidemic Response and Innovation, Stellenbosch University and KRISP, KZN Research Innovation and Sequencing Platform, UKZN.	Ismael et al
1088	hCoV-19/Mozambique/CERI-KRISP-K037886/2022	EPI_ISL_11621062	2022-01-25	Instituto Nacional de Saude (INS)	CERI, Centre for Epidemic Response and Innovation, Stellenbosch University and KRISP, KZN Research Innovation and Sequencing Platform, UKZN.	Ismael et al
1089	hCoV-19/Mozambique/CERI-KRISP-K037887/2022	EPI_ISL_11621063	2022-01-16	Instituto Nacional de Saude (INS)	CERI, Centre for Epidemic Response and Innovation, Stellenbosch University and KRISP, KZN Research Innovation and Sequencing Platform, UKZN.	Ismael et al
1090	hCoV-19/Mozambique/CERI-KRISP-K037889/2022	EPI_ISL_11621064	2022-01-17	Instituto Nacional de Saude (INS)	CERI, Centre for Epidemic Response and Innovation, Stellenbosch University and KRISP, KZN Research Innovation and Sequencing Platform, UKZN.	Ismael et al
1091	hCoV-19/Mozambique/CERI-KRISP-K037890/2022	EPI_ISL_11621065	2022-01-11	Instituto Nacional de Saude (INS)	CERI, Centre for Epidemic Response and Innovation, Stellenbosch University and KRISP, KZN Research Innovation and Sequencing Platform, UKZN.	Ismael et al
1092	hCoV-19/Mozambique/CERI-KRISP-K037892/2022	EPI_ISL_11621066	2022-01-04	Instituto Nacional de Saude (INS)	CERI, Centre for Epidemic Response and Innovation, Stellenbosch University and KRISP, KZN Research Innovation and Sequencing Platform, UKZN.	Ismael et al
1093	hCoV-19/Mozambique/CERI-KRISP-K037893/2022	EPI_ISL_11621067	2022-01-04	Instituto Nacional de Saude (INS)	CERI, Centre for Epidemic Response and Innovation, Stellenbosch University and KRISP, KZN Research Innovation and Sequencing Platform, UKZN.	Ismael et al
1094	hCoV-19/Mozambique/CERI-KRISP-K037894/2022	EPI_ISL_11621068	2022-01-04	Instituto Nacional de Saude (INS)	CERI, Centre for Epidemic Response and Innovation, Stellenbosch University and KRISP, KZN Research Innovation and Sequencing Platform, UKZN.	Ismael et al
1095	hCoV-19/Mozambique/CERI-KRISP-K037895/2022	EPI_ISL_11621069	2022-01-04	Instituto Nacional de Saude (INS)	CERI, Centre for Epidemic Response and Innovation, Stellenbosch University and KRISP, KZN Research Innovation and Sequencing Platform, UKZN.	Ismael et al
1096	hCoV-19/Mozambique/CERI-KRISP-K037896/2022	EPI_ISL_11621070	2022-01-05	Instituto Nacional de Saude (INS)	CERI, Centre for Epidemic Response and Innovation, Stellenbosch University and KRISP, KZN Research Innovation and Sequencing Platform, UKZN.	Ismael et al
1097	hCoV-19/Mozambique/CERI-KRISP-K037898/2022	EPI_ISL_11621071	2022-01-19	Instituto Nacional de Saude (INS)	CERI, Centre for Epidemic Response and Innovation, Stellenbosch University and KRISP, KZN Research Innovation and Sequencing Platform, UKZN.	Ismael et al
1098	hCoV-19/Mozambique/CERI-KRISP-K037903/2022	EPI_ISL_11621072	2022-02-09	Instituto Nacional de Saude (INS)	CERI, Centre for Epidemic Response and Innovation, Stellenbosch University and KRISP, KZN Research Innovation and Sequencing Platform, UKZN.	Ismael et al
1099	hCoV-19/Mozambique/CERI-KRISP-K037906/2022	EPI_ISL_11621073	2022-02-14	Instituto Nacional de Saude (INS)	CERI, Centre for Epidemic Response and Innovation, Stellenbosch University and KRISP, KZN Research Innovation and Sequencing Platform, UKZN.	Ismael et al
1100	hCoV-19/Mozambique/CERI-KRISP-K037907/2022	EPI_ISL_11621074	2022-02-04	Instituto Nacional de Saude (INS)	CERI, Centre for Epidemic Response and Innovation, Stellenbosch University and KRISP, KZN Research Innovation and Sequencing Platform, UKZN.	Ismael et al
1101	hCoV-19/Mozambique/CERI-KRISP-K037908/2022	EPI_ISL_11621075	2022-02-04	Instituto Nacional de Saude (INS)	CERI, Centre for Epidemic Response and Innovation, Stellenbosch University and KRISP, KZN Research Innovation and Sequencing Platform, UKZN.	Ismael et al
1102	hCoV-19/Mozambique/CERI-KRISP-K037909/2022	EPI_ISL_11621076	2022-02-15	Instituto Nacional de Saude (INS)	CERI, Centre for Epidemic Response and Innovation, Stellenbosch University and KRISP, KZN Research Innovation and Sequencing Platform, UKZN.	Ismael et al
1103	hCoV-19/Mozambique/CERI-KRISP-K037911/2022	EPI_ISL_11621077	2022-02-06	Instituto Nacional de Saude (INS)	CERI, Centre for Epidemic Response and Innovation, Stellenbosch University and KRISP, KZN Research Innovation and Sequencing Platform, UKZN.	Ismael et al
1104	hCoV-19/Mozambique/CERI-KRISP-K037913/2022	EPI_ISL_11621078	2022-02-21	Instituto Nacional de Saude (INS)	CERI, Centre for Epidemic Response and Innovation, Stellenbosch University and KRISP, KZN Research Innovation and Sequencing Platform, UKZN.	Ismael et al
1105	hCoV-19/Mozambique/CERI-KRISP-K037914/2022	EPI_ISL_11621079	2022-01-19	Instituto Nacional de Saude (INS)	CERI, Centre for Epidemic Response and Innovation, Stellenbosch University and KRISP, KZN Research Innovation and Sequencing Platform, UKZN.	Ismael et al
1106	hCoV-19/Mozambique/CERI-KRISP-K037915/2022	EPI_ISL_11621080	2022-01-18	Instituto Nacional de Saude (INS)	CERI, Centre for Epidemic Response and Innovation, Stellenbosch University and KRISP, KZN Research Innovation and Sequencing Platform, UKZN.	Ismael et al
1107	hCoV-19/Mozambique/CERI-KRISP-K037916/2022	EPI_ISL_11621081	2022-02-17	Instituto Nacional de Saude (INS)	CERI, Centre for Epidemic Response and Innovation, Stellenbosch University and KRISP, KZN Research Innovation and Sequencing Platform, UKZN.	Ismael et al
1108	hCoV-19/Mozambique/CERI-KRISP-K037917/2022	EPI_ISL_11621082	2022-02-17	Instituto Nacional de Saude (INS)	CERI, Centre for Epidemic Response and Innovation, Stellenbosch University and KRISP, KZN Research Innovation and Sequencing Platform, UKZN.	Ismael et al
1109	hCoV-19/Mozambique/CERI-KRISP-K037918/2022	EPI_ISL_11621083	2022-02-17	Instituto Nacional de Saude (INS)	CERI, Centre for Epidemic Response and Innovation, Stellenbosch University and KRISP, KZN Research Innovation and Sequencing Platform, UKZN.	Ismael et al
1110	hCoV-19/Mozambique/CERI-KRISP-K037919/2022	EPI_ISL_11621084	2022-01-17	Instituto Nacional de Saude (INS)	CERI, Centre for Epidemic Response and Innovation, Stellenbosch University and KRISP, KZN Research Innovation and Sequencing Platform, UKZN.	Ismael et al
1111	hCoV-19/Mozambique/CERI-KRISP-K037920/2022	EPI_ISL_11621085	2022-01-18	Instituto Nacional de Saude (INS)	CERI, Centre for Epidemic Response and Innovation, Stellenbosch University and KRISP, KZN Research Innovation and Sequencing Platform, UKZN.	Ismael et al
1112	hCoV-19/Mozambique/CERI-KRISP-K037921/2022	EPI_ISL_11621086	2022-01-31	Instituto Nacional de Saude (INS)	CERI, Centre for Epidemic Response and Innovation, Stellenbosch University and KRISP, KZN Research Innovation and Sequencing Platform, UKZN.	Ismael et al
1113	hCoV-19/Mozambique/CERI-KRISP-K037922/2022	EPI_ISL_11621087	2022-01-31	Instituto Nacional de Saude (INS)	CERI, Centre for Epidemic Response and Innovation, Stellenbosch University and KRISP, KZN Research Innovation and Sequencing Platform, UKZN.	Ismael et al
1114	hCoV-19/Mozambique/CERI-KRISP-K037923/2022	EPI_ISL_11621088	2022-02-04	Instituto Nacional de Saude (INS)	CERI, Centre for Epidemic Response and Innovation, Stellenbosch University and KRISP, KZN Research Innovation and Sequencing Platform, UKZN.	Ismael et al
1115	hCoV-19/Mozambique/CERI-KRISP-K037924/2022	EPI_ISL_11621089	2022-02-04	Instituto Nacional de Saude (INS)	CERI, Centre for Epidemic Response and Innovation, Stellenbosch University and KRISP, KZN Research Innovation and Sequencing Platform, UKZN.	Ismael et al
1116	hCoV-19/Mozambique/CERI-KRISP-K037925/2022	EPI_ISL_11621090	2022-02-04	Instituto Nacional de Saude (INS)	CERI, Centre for Epidemic Response and Innovation, Stellenbosch University and KRISP, KZN Research Innovation and Sequencing Platform, UKZN.	Ismael et al
1117	hCoV-19/Mozambique/N24978/2021	EPI_ISL_9452291	2021-12-04	Instituto Nacional de Saude (INS)	National Institute for Communicable Diseases of the National Health Laboratory Service	Viegas et al
1118	hCoV-19/Mozambique/N24979/2021	EPI_ISL_9452293	2021-12-04	Instituto Nacional de Saude (INS)	National Institute for Communicable Diseases of the National Health Laboratory Service	Viegas et al
1119	hCoV-19/Mozambique/N24980/2021	EPI_ISL_9452294	2021-12-04	Instituto Nacional de Saude (INS)	National Institute for Communicable Diseases of the National Health Laboratory Service	Viegas et al
1120	hCoV-19/Mozambique/N24981/2021	EPI_ISL_9452295	2021-12-04	Instituto Nacional de Saude (INS)	National Institute for Communicable Diseases of the National Health Laboratory Service	Viegas et al
1121	hCoV-19/Mozambique/N24982/2021	EPI_ISL_9452296	2021-12-04	Instituto Nacional de Saude (INS)	National Institute for Communicable Diseases of the National Health Laboratory Service	Viegas et al
1122	hCoV-19/Mozambique/N24985/2021	EPI_ISL_9452297	2021-12-04	Instituto Nacional de Saude (INS)	National Institute for Communicable Diseases of the National Health Laboratory Service	Viegas et al
1123	hCoV-19/Mozambique/N24988/2021	EPI_ISL_9452298	2021-12-04	Instituto Nacional de Saude (INS)	National Institute for Communicable Diseases of the National Health Laboratory Service	Viegas et al
1124	hCoV-19/Mozambique/N24992/2021	EPI_ISL_9452299	2021-12-04	Instituto Nacional de Saude (INS)	National Institute for Communicable Diseases of the National Health Laboratory Service	Viegas et al
1125	hCoV-19/Mozambique/N25005/2021	EPI_ISL_9452301	2021-12-04	Instituto Nacional de Saude (INS)	National Institute for Communicable Diseases of the National Health Laboratory Service	Viegas et al
1126	hCoV-19/Mozambique/N25006/2021	EPI_ISL_9452302	2021-12-04	Instituto Nacional de Saude (INS)	National Institute for Communicable Diseases of the National Health Laboratory Service	Viegas et al
1127	hCoV-19/Mozambique/N25007/2021	EPI_ISL_9452303	2021-12-04	Instituto Nacional de Saude (INS)	National Institute for Communicable Diseases of the National Health Laboratory Service	Viegas et al
1128	hCoV-19/Mozambique/N25008/2021	EPI_ISL_9452304	2021-12-04	Instituto Nacional de Saude (INS)	National Institute for Communicable Diseases of the National Health Laboratory Service	Viegas et al
1129	hCoV-19/Mozambique/N25009/2021	EPI_ISL_9452305	2021-12-04	Instituto Nacional de Saude (INS)	National Institute for Communicable Diseases of the National Health Laboratory Service	Viegas et al
1130	hCoV-19/Mozambique/N25010/2021	EPI_ISL_9452306	2021-12-04	Instituto Nacional de Saude (INS)	National Institute for Communicable Diseases of the National Health Laboratory Service	Viegas et al
1131	hCoV-19/Mozambique/N25011/2021	EPI_ISL_9452307	2021-12-04	Instituto Nacional de Saude (INS)	National Institute for Communicable Diseases of the National Health Laboratory Service	Viegas et al
1132	hCoV-19/Mozambique/N25013/2021	EPI_ISL_9452308	2021-12-04	Instituto Nacional de Saude (INS)	National Institute for Communicable Diseases of the National Health Laboratory Service	Viegas et al
1133	hCoV-19/Mozambique/N25014/2021	EPI_ISL_9452309	2021-12-06	Instituto Nacional de Saude (INS)	National Institute for Communicable Diseases of the National Health Laboratory Service	Viegas et al
1134	hCoV-19/Mozambique/N25015/2021	EPI_ISL_9452310	2021-12-06	Instituto Nacional de Saude (INS)	National Institute for Communicable Diseases of the National Health Laboratory Service	Viegas et al
1135	hCoV-19/Mozambique/CERI-KRISP-K035201/2022	EPI_ISL_9621806	2022-01-14	Instituto Nacional de Saude (INS)	CERI, Centre for Epidemic Response and Innvoation, Stellenbosch University and KRISP, KZN Research Innovation and Sequencing Platform, UKZN.	Ismael et al
1136	hCoV-19/Mozambique/CERI-KRISP-K035194/2021	EPI_ISL_9621807	2021-12-29	Instituto Nacional de Saude (INS)	CERI, Centre for Epidemic Response and Innvoation, Stellenbosch University and KRISP, KZN Research Innovation and Sequencing Platform, UKZN.	Ismael et al
1137	hCoV-19/Mozambique/CERI-KRISP-K035195/2021	EPI_ISL_9621808	2021-12-30	Instituto Nacional de Saude (INS)	CERI, Centre for Epidemic Response and Innvoation, Stellenbosch University and KRISP, KZN Research Innovation and Sequencing Platform, UKZN.	Ismael et al
1138	hCoV-19/Mozambique/CERI-KRISP-K035197/2021	EPI_ISL_9621809	2021-12-14	Instituto Nacional de Saude (INS)	CERI, Centre for Epidemic Response and Innvoation, Stellenbosch University and KRISP, KZN Research Innovation and Sequencing Platform, UKZN.	Ismael et al
1139	hCoV-19/Mozambique/CERI-KRISP-K035198/2021	EPI_ISL_9621810	2021-12-16	Instituto Nacional de Saude (INS)	CERI, Centre for Epidemic Response and Innvoation, Stellenbosch University and KRISP, KZN Research Innovation and Sequencing Platform, UKZN.	Ismael et al
1140	hCoV-19/Mozambique/CERI-KRISP-K035200/2022	EPI_ISL_9621811	2022-01-20	Instituto Nacional de Saude (INS)	CERI, Centre for Epidemic Response and Innvoation, Stellenbosch University and KRISP, KZN Research Innovation and Sequencing Platform, UKZN.	Ismael et al
1141	hCoV-19/Mozambique/CERI-KRISP-K035190/2021	EPI_ISL_9621812	2021-12-30	Instituto Nacional de Saude (INS)	CERI, Centre for Epidemic Response and Innvoation, Stellenbosch University and KRISP, KZN Research Innovation and Sequencing Platform, UKZN.	Ismael et al
1142	hCoV-19/Mozambique/CERI-KRISP-K035369/2021	EPI_ISL_9686832	2021-12-24	Instituto Nacional de Saude (INS)	CERI, Centre for Epidemic Response and Innovation, Stellenbosch University and KRISP, KZN Research Innovation and Sequencing Platform, UKZN.	Ismael et al
	Russia/SPE/RII/MH15446S/2021	EPI_ISL_1919428	2021-03-11	HELIX LLC	WHO National Influenza Centre Russian Federation	Andrey Komissarov et al
	Russia/SPE/RII/MH15447S/2021	EPI_ISL_1919429	2021-03-12	HELIX LLC	WHO National Influenza Centre Russian Federation	Andrey Komissarov et al
	Russia/SPE/RII/MH15448S/2021	EPI_ISL_1919430	2021-03-12	HELIX LLC	WHO National Influenza Centre Russian Federation	Andrey Komissarov et al
	Russia/SPE/RII/MH15449S/2021	EPI_ISL_1919431	2021-03-12	HELIX LLC	WHO National Influenza Centre Russian Federation	Andrey Komissarov et al
	Russia/SPE/RII/MH15450S/2021	EPI_ISL_1919432	2021-03-11	HELIX LLC	WHO National Influenza Centre Russian Federation	Andrey Komissarov et al
	Russia/SPE/RII/MH15452S/2021	EPI_ISL_1919433	2021-03-12	HELIX LLC	WHO National Influenza Centre Russian Federation	Andrey Komissarov et al
	Russia/SPE/RII/MH15453S/2021	EPI_ISL_1919434	2021-03-11	HELIX LLC	WHO National Influenza Centre Russian Federation	Andrey Komissarov et al
	Russia/SPE/RII/34469S/2021	EPI_ISL_2385131	2021-05-15	WHO National Influenza Centre Russian Federation	WHO National Influenza Centre Russian Federation	Andrey Komissarov et al
	Russia/SPE/RII/MH15455S/2021	EPI_ISL_2007305	2021-03-12	HELIX LLC	WHO National Influenza Centre Russian Federation	Andrey Komissarov et al
	Russia/SPE/RII/MH15456S/2021	EPI_ISL_1919436	2021-03-12	HELIX LLC	WHO National Influenza Centre Russian Federation	Andrey Komissarov et al
	Russia/SPE/RII/MH15457S/2021	EPI_ISL_1919437	2021-03-11	HELIX LLC	WHO National Influenza Centre Russian Federation	Andrey Komissarov et al
	Russia/SPE/RII/MH15458S/2021	EPI_ISL_1919438	2021-03-12	HELIX LLC	WHO National Influenza Centre Russian Federation	Andrey Komissarov et al
	Russia/SPE/RII/MH17810S/2021	EPI_ISL_2450532	2021-05-15	WHO National Influenza Centre Russian Federation	WHO National Influenza Centre Russian Federation	Andrey Komissarov et al
	Russia/SPE/RII/MH15460S/2021	EPI_ISL_1919440	2021-03-11	HELIX LLC	WHO National Influenza Centre Russian Federation	Andrey Komissarov et al
	Russia/SPE/RII/MH15466S/2021	EPI_ISL_1919442	2021-03-01	HELIX LLC	WHO National Influenza Centre Russian Federation	Andrey Komissarov et al
	Russia/SPE/RII/MH15467S/2021	EPI_ISL_1919443	2021-03-01	HELIX LLC	WHO National Influenza Centre Russian Federation	Andrey Komissarov et al
	Russia/SPE/RII/MH15468S/2021	EPI_ISL_1919444	2021-02-26	HELIX LLC	WHO National Influenza Centre Russian Federation	Andrey Komissarov et al
	Russia/SPE/RII/MH15647S/2021	EPI_ISL_1652537	2021-03-03	HELIX LLC	WHO National Influenza Centre Russian Federation	Andrey Komissarov et al
	Russia/SPE/RII/MH15648S/2021	EPI_ISL_1652538	2021-03-09	HELIX LLC	WHO National Influenza Centre Russian Federation	Andrey Komissarov et al
	Russia/SPE/RII/MH15649S/2021	EPI_ISL_1652539	2021-03-12	HELIX LLC	WHO National Influenza Centre Russian Federation	Andrey Komissarov et al
	Russia/SPE/RII/MH18565S/2021	EPI_ISL_2523648	2021-05-15	HELIX LLC	WHO National Influenza Centre Russian Federation	Andrey Komissarov et al
	Russia/SPE/RII/MH15652S/2021	EPI_ISL_1652541	2021-02-26	HELIX LLC	WHO National Influenza Centre Russian Federation	Andrey Komissarov et al
	Russia/SPE/RII/MH15653S/2021	EPI_ISL_1652542	2021-03-17	HELIX LLC	WHO National Influenza Centre Russian Federation	Andrey Komissarov et al
	Russia/SPE/RII/34484S/2021	EPI_ISL_2385133	2021-05-16	WHO National Influenza Centre Russian Federation	WHO National Influenza Centre Russian Federation	Andrey Komissarov et al
	Russia/SPE/RII/MH15655S/2021	EPI_ISL_1652544	2021-03-09	HELIX LLC	WHO National Influenza Centre Russian Federation	Andrey Komissarov et al
	Russia/SPE/RII/MH15656S/2021	EPI_ISL_1652545	2021-03-18	HELIX LLC	WHO National Influenza Centre Russian Federation	Andrey Komissarov et al
	Russia/SPE/RII/MH15659S/2021	EPI_ISL_1652547	2021-03-14	HELIX LLC	WHO National Influenza Centre Russian Federation	Andrey Komissarov et al
	Russia/SPE/RII/MH15661S/2021	EPI_ISL_1652548	2021-03-01	HELIX LLC	WHO National Influenza Centre Russian Federation	Andrey Komissarov et al
	Russia/SPE/RII/MH15662S/2021	EPI_ISL_1652549	2021-03-09	HELIX LLC	WHO National Influenza Centre Russian Federation	Andrey Komissarov et al
	Russia/SPE/RII/MH15663S/2021	EPI_ISL_1652550	2021-03-09	HELIX LLC	WHO National Influenza Centre Russian Federation	Andrey Komissarov et al
	Russia/SPE/RII/MH15664S/2021	EPI_ISL_1652551	2021-03-09	HELIX LLC	WHO National Influenza Centre Russian Federation	Andrey Komissarov et al
	Russia/SPE/RII/MH15666S/2021	EPI_ISL_1652553	2021-03-09	HELIX LLC	WHO National Influenza Centre Russian Federation	Andrey Komissarov et al
	Russia/CHU/CRIE/L188E0105u/2021	EPI_ISL_8189454	2021-05-17	Molecular diagnostic laboratory of Federal Budget Institution of Science "Central Research Institute of Epidemiology" of The Federal Service on Customers' Rights Protection and Human Well/being Surveillance	Group of Genomics and Postgenomic Technologies of Central Research Institute of Epidemiology	Samoilov A.E. et al
	Russia/SPE/RII/MH15668S/2021	EPI_ISL_1652555	2021-03-09	HELIX LLC	WHO National Influenza Centre Russian Federation	Andrey Komissarov et al
	Russia/SPE/RII/MH15669S/2021	EPI_ISL_1652556	2021-03-09	HELIX LLC	WHO National Influenza Centre Russian Federation	Andrey Komissarov et al
	Russia/SPE/RII/MH15670S/2021	EPI_ISL_1652557	2021-03-09	HELIX LLC	WHO National Influenza Centre Russian Federation	Andrey Komissarov et al
	Russia/SPE/RII/MH15671S/2021	EPI_ISL_1652558	2021-03-15	HELIX LLC	WHO National Influenza Centre Russian Federation	Andrey Komissarov et al
	Russia/CHU/CRIE/L188E0106u/2021	EPI_ISL_8189453	2021-05-17	Molecular diagnostic laboratory of Federal Budget Institution of Science "Central Research Institute of Epidemiology" of The Federal Service on Customers' Rights Protection and Human Well/being Surveillance	Group of Genomics and Postgenomic Technologies of Central Research Institute of Epidemiology	Samoilov A.E. et al
	Russia/SPE/RII/MH15673S/2021	EPI_ISL_1652560	2021-03-09	HELIX LLC	WHO National Influenza Centre Russian Federation	Andrey Komissarov et al
	Russia/SPE/RII/MH15675S/2021	EPI_ISL_1652561	2021-03-09	HELIX LLC	WHO National Influenza Centre Russian Federation	Andrey Komissarov et al
	Russia/SPE/RII/MH15676S/2021	EPI_ISL_1652562	2021-03-12	HELIX LLC	WHO National Influenza Centre Russian Federation	Andrey Komissarov et al
	Russia/CHU/CRIE/L188E0108/2021	EPI_ISL_8189509	2021-05-17	Molecular diagnostic laboratory of Federal Budget Institution of Science "Central Research Institute of Epidemiology" of The Federal Service on Customers' Rights Protection and Human Well/being Surveillance	Group of Genomics and Postgenomic Technologies of Central Research Institute of Epidemiology	Samoilov A.E. et al
	Russia/SPE/RII/MH15678S/2021	EPI_ISL_1652564	2021-03-09	HELIX LLC	WHO National Influenza Centre Russian Federation	Andrey Komissarov et al
	Russia/SPE/RII/MH15679S/2021	EPI_ISL_1652565	2021-03-09	HELIX LLC	WHO National Influenza Centre Russian Federation	Andrey Komissarov et al
	Russia/SPE/RII/MH15680S/2021	EPI_ISL_1652566	2021-03-09	HELIX LLC	WHO National Influenza Centre Russian Federation	Andrey Komissarov et al
	Russia/SPE/RII/MH15681S/2021	EPI_ISL_1652567	2021-03-12	HELIX LLC	WHO National Influenza Centre Russian Federation	Andrey Komissarov et al
	Russia/SPE/RII/MH15682S/2021	EPI_ISL_1652568	2021-03-09	HELIX LLC	WHO National Influenza Centre Russian Federation	Andrey Komissarov et al
	Russia/SPE/RII/MH15683S/2021	EPI_ISL_1652569	2021-03-12	HELIX LLC	WHO National Influenza Centre Russian Federation	Andrey Komissarov et al
	Russia/SPE/RII/MH15686S/2021	EPI_ISL_1652572	2021-03-09	HELIX LLC	WHO National Influenza Centre Russian Federation	Andrey Komissarov et al
	Russia/SPE/RII/MH15687S/2021	EPI_ISL_1652573	2021-03-09	HELIX LLC	WHO National Influenza Centre Russian Federation	Andrey Komissarov et al
	Russia/SPE/RII/MH15689S/2021	EPI_ISL_1652575	2021-03-04	HELIX LLC	WHO National Influenza Centre Russian Federation	Andrey Komissarov et al
	Russia/SPE/RII/MH1568S/2020	EPI_ISL_596293	2020-09-10	HELIX LCC	WHO National Influenza Centre Russian Federation	Andrey Komissarov et al
	Russia/SPE/RII/MH15690S/2021	EPI_ISL_1652576	2021-02-27	HELIX LLC	WHO National Influenza Centre Russian Federation	Andrey Komissarov et al
	Russia/CHU/CRIE/L188E0111/2021	EPI_ISL_8189430	2021-05-17	Molecular diagnostic laboratory of Federal Budget Institution of Science "Central Research Institute of Epidemiology" of The Federal Service on Customers' Rights Protection and Human Well/being Surveillance	Group of Genomics and Postgenomic Technologies of Central Research Institute of Epidemiology	Samoilov A.E. et al
	Russia/SPE/RII/MH15692S/2021	EPI_ISL_1652578	2021-03-11	HELIX LLC	WHO National Influenza Centre Russian Federation	Andrey Komissarov et al
	Russia/SPE/RII/MH15693S/2021	EPI_ISL_1652579	2021-03-09	HELIX LLC	WHO National Influenza Centre Russian Federation	Andrey Komissarov et al
	Russia/SPE/RII/MH15694S/2021	EPI_ISL_1652580	2021-03-01	HELIX LLC	WHO National Influenza Centre Russian Federation	Andrey Komissarov et al
	Russia/SPE/RII/MH15695S/2021	EPI_ISL_1652581	2021-03-09	HELIX LLC	WHO National Influenza Centre Russian Federation	Andrey Komissarov et al
	Russia/SPE/RII/MH15696S/2021	EPI_ISL_1652582	2021-03-09	HELIX LLC	WHO National Influenza Centre Russian Federation	Andrey Komissarov et al
	Russia/SPE/RII/MH15697S/2021	EPI_ISL_1652583	2021-03-09	HELIX LLC	WHO National Influenza Centre Russian Federation	Andrey Komissarov et al
	Russia/KOS/CRIE/L188M0685/2021	EPI_ISL_8189721	2021-05-17	Molecular diagnostic laboratory of Federal Budget Institution of Science "Central Research Institute of Epidemiology" of The Federal Service on Customers' Rights Protection and Human Well/being Surveillance	Group of Genomics and Postgenomic Technologies of Central Research Institute of Epidemiology	Samoilov A.E. et al
	Russia/SPE/RII/MH15699S/2021	EPI_ISL_1652585	2021-03-09	HELIX LLC	WHO National Influenza Centre Russian Federation	Andrey Komissarov et al
	Russia/MOW/CRIE/L188M0801/2021	EPI_ISL_3101096	2021-05-17	Molecular diagnostic laboratory of Federal Budget Institution of Science "Central Research Institute of Epidemiology" of The Federal Service on Customers' Rights Protection and Human Well/being Surveillance	Group of Genomics and Postgenomic Technologies of Central Research Institute of Epidemiology	Samoilov A.E. et al
	Russia/MOW/CRIE/L188T0144hu/2021	EPI_ISL_3508123	2021-05-17	Molecular diagnostic laboratory of Federal Budget Institution of Science "Central Research Institute of Epidemiology" of The Federal Service on Customers' Rights Protection and Human Well/being Surveillance	Group of Genomics and Postgenomic Technologies of Central Research Institute of Epidemiology	Samoilov A.E. et al
	Russia/SPE/RII/MH15705S/2021	EPI_ISL_1652588	2021-03-16	HELIX LLC	WHO National Influenza Centre Russian Federation	Andrey Komissarov et al
	Russia/SPE/RII/MH15706S/2021	EPI_ISL_1652589	2021-03-04	HELIX LLC	WHO National Influenza Centre Russian Federation	Andrey Komissarov et al
	Russia/SPE/RII/MH15707S/2021	EPI_ISL_1652590	2021-03-09	HELIX LLC	WHO National Influenza Centre Russian Federation	Andrey Komissarov et al
	Russia/SPE/RII/MH15709S/2021	EPI_ISL_1652591	2021-03-12	HELIX LLC	WHO National Influenza Centre Russian Federation	Andrey Komissarov et al
	Russia/SPE/RII/MH15710S/2021	EPI_ISL_1652592	2021-03-12	HELIX LLC	WHO National Influenza Centre Russian Federation	Andrey Komissarov et al
	Russia/SPE/RII/MH15711S/2021	EPI_ISL_1652593	2021-03-09	HELIX LLC	WHO National Influenza Centre Russian Federation	Andrey Komissarov et al
	Russia/SPE/RII/34509S/2021	EPI_ISL_2385136	2021-05-17	WHO National Influenza Centre Russian Federation	WHO National Influenza Centre Russian Federation	Andrey Komissarov et al
	Russia/SPE/RII/34512S/2021	EPI_ISL_5263334	2021-05-17	WHO National Influenza Centre Russian Federation	WHO National Influenza Centre Russian Federation	Andrey Komissarov et al
	Russia/SPE/RII/MH15715S/2021	EPI_ISL_1652596	2021-03-09	HELIX LLC	WHO National Influenza Centre Russian Federation	Andrey Komissarov et al
	Russia/SPE/RII/MH15716S/2021	EPI_ISL_1652597	2021-03-02	HELIX LLC	WHO National Influenza Centre Russian Federation	Andrey Komissarov et al
	Russia/SPE/RII/34635S/2021	EPI_ISL_2385151	2021-05-17	WHO National Influenza Centre Russian Federation	WHO National Influenza Centre Russian Federation	Andrey Komissarov et al
	Russia/SPE/RII/MH15718S/2021	EPI_ISL_1652599	2021-03-01	HELIX LLC	WHO National Influenza Centre Russian Federation	Andrey Komissarov et al
	Russia/MOW/CRIE/L188M0820u/2021	EPI_ISL_3101116	2021-05-18	Molecular diagnostic laboratory of Federal Budget Institution of Science "Central Research Institute of Epidemiology" of The Federal Service on Customers' Rights Protection and Human Well/being Surveillance	Group of Genomics and Postgenomic Technologies of Central Research Institute of Epidemiology	Samoilov A.E. et al
	Russia/SPE/RII/MH15721S/2021	EPI_ISL_1652602	2021-03-17	HELIX LLC	WHO National Influenza Centre Russian Federation	Andrey Komissarov et al
	Russia/SPE/RII/MH15722S/2021	EPI_ISL_1652603	2021-03-17	HELIX LLC	WHO National Influenza Centre Russian Federation	Andrey Komissarov et al
	Russia/SPE/RII/MH15725S/2021	EPI_ISL_1652604	2021-02-28	HELIX LLC	WHO National Influenza Centre Russian Federation	Andrey Komissarov et al
	Russia/MUR/RII/MH18573S/2021	EPI_ISL_2523398	2021-05-10	HELIX LLC	WHO National Influenza Centre Russian Federation	Andrey Komissarov et al
	Russia/RYA/CRIE/L188M0705/2021	EPI_ISL_3101090	2021-05-18	Molecular diagnostic laboratory of Federal Budget Institution of Science "Central Research Institute of Epidemiology" of The Federal Service on Customers' Rights Protection and Human Well/being Surveillance	Group of Genomics and Postgenomic Technologies of Central Research Institute of Epidemiology	Samoilov A.E. et al
	Russia/SPE/RII/MH15729S/2021	EPI_ISL_1652607	2021-02-26	HELIX LLC	WHO National Influenza Centre Russian Federation	Andrey Komissarov et al
	Russia/SPE/RII/MH15731S/2021	EPI_ISL_1652608	2021-03-14	HELIX LLC	WHO National Influenza Centre Russian Federation	Andrey Komissarov et al
	Russia/SPE/RII/MH15733S/2021	EPI_ISL_1652609	2021-03-12	HELIX LLC	WHO National Influenza Centre Russian Federation	Andrey Komissarov et al
	Russia/SPE/RII/34642S/2021	EPI_ISL_2385154	2021-05-18	WHO National Influenza Centre Russian Federation	WHO National Influenza Centre Russian Federation	Andrey Komissarov et al
	Russia/SPE/RII/34645S/2021	EPI_ISL_2385155	2021-05-18	WHO National Influenza Centre Russian Federation	WHO National Influenza Centre Russian Federation	Andrey Komissarov et al
	Russia/SPE/RII/MH15737S/2021	EPI_ISL_1652613	2021-03-04	HELIX LLC	WHO National Influenza Centre Russian Federation	Andrey Komissarov et al
	Russia/SPE/RII/MH15739S/2021	EPI_ISL_1652614	2021-03-09	HELIX LLC	WHO National Influenza Centre Russian Federation	Andrey Komissarov et al
	Russia/SPE/RII/MH1573S/2020	EPI_ISL_602338	2020-09-11	HELIX LLC	WHO National Influenza Centre Russian Federation	Andrey Komissarov et al
	Russia/SPE/RII/MH15740S/2021	EPI_ISL_1652615	2021-03-01	HELIX LLC	WHO National Influenza Centre Russian Federation	Andrey Komissarov et al
	Russia/SPE/RII/MH15741S/2021	EPI_ISL_1652616	2021-03-09	HELIX LLC	WHO National Influenza Centre Russian Federation	Andrey Komissarov et al
	Russia/SPE/RII/MH15742S/2021	EPI_ISL_1652617	2021-03-09	HELIX LLC	WHO National Influenza Centre Russian Federation	Andrey Komissarov et al
	Russia/SPE/RII/MH15743S/2021	EPI_ISL_1652618	2021-03-09	HELIX LLC	WHO National Influenza Centre Russian Federation	Andrey Komissarov et al
	Russia/SPE/RII/MH15744S/2021	EPI_ISL_1652619	2021-03-09	HELIX LLC	WHO National Influenza Centre Russian Federation	Andrey Komissarov et al
	Russia/SPE/RII/MH15746S/2021	EPI_ISL_1652621	2021-03-09	HELIX LLC	WHO National Influenza Centre Russian Federation	Andrey Komissarov et al
	Russia/SPE/RII/MH15747S/2021	EPI_ISL_1652622	2021-03-02	HELIX LLC	WHO National Influenza Centre Russian Federation	Andrey Komissarov et al
	Russia/SPE/RII/MH15749S/2021	EPI_ISL_1652624	2021-03-09	HELIX LLC	WHO National Influenza Centre Russian Federation	Andrey Komissarov et al
	Russia/SPE/RII/34719S/2021	EPI_ISL_2385164	2021-05-18	WHO National Influenza Centre Russian Federation	WHO National Influenza Centre Russian Federation	Andrey Komissarov et al
	Russia/SPE/RII/MH15751S/2021	EPI_ISL_1652626	2021-03-12	HELIX LLC	WHO National Influenza Centre Russian Federation	Andrey Komissarov et al
	Russia/SPE/RII/MH15752S/2021	EPI_ISL_1652627	2021-03-12	HELIX LLC	WHO National Influenza Centre Russian Federation	Andrey Komissarov et al
	Russia/SPE/RII/MH15753S/2021	EPI_ISL_1652628	2021-02-26	HELIX LLC	WHO National Influenza Centre Russian Federation	Andrey Komissarov et al
	Russia/SPE/RII/MH15756S/2021	EPI_ISL_1652629	2021-03-01	HELIX LLC	WHO National Influenza Centre Russian Federation	Andrey Komissarov et al
	Russia/SPE/RII/MH15757S/2021	EPI_ISL_1652630	2021-03-04	HELIX LLC	WHO National Influenza Centre Russian Federation	Andrey Komissarov et al
	Russia/SPE/RII/MH15760S/2021	EPI_ISL_1652632	2021-03-12	HELIX LLC	WHO National Influenza Centre Russian Federation	Andrey Komissarov et al
	Russia/SPE/RII/MH15761S/2021	EPI_ISL_1652633	2021-03-11	HELIX LLC	WHO National Influenza Centre Russian Federation	Andrey Komissarov et al
	Russia/SPE/RII/MH15762S/2021	EPI_ISL_1652634	2021-03-09	HELIX LLC	WHO National Influenza Centre Russian Federation	Andrey Komissarov et al
	Russia/SPE/RII/MH15764S/2021	EPI_ISL_1652635	2021-03-12	HELIX LLC	WHO National Influenza Centre Russian Federation	Andrey Komissarov et al
	Russia/SPE/RII/MH15764V1/2021	EPI_ISL_3454837	2021-03-12	HELIX LLC	WHO National Influenza Centre Russian Federation	Andrey Komissarov et al
	Russia/SPE/RII/MH15764V2/2021	EPI_ISL_3454841	2021-03-12	HELIX LLC	WHO National Influenza Centre Russian Federation	Andrey Komissarov et al
	Russia/SPE/RII/MH15764V3/2021	EPI_ISL_8112527	2021-03-12	HELIX LLC	WHO National Influenza Centre Russian Federation	Andrey Komissarov et al
	Russia/SPE/RII/MH15765S/2021	EPI_ISL_1652636	2021-03-16	HELIX LLC	WHO National Influenza Centre Russian Federation	Andrey Komissarov et al
	Russia/SPE/RII/MH15766S/2021	EPI_ISL_1652637	2021-03-09	HELIX LLC	WHO National Influenza Centre Russian Federation	Andrey Komissarov et al
	Russia/SPE/RII/MH15768S/2021	EPI_ISL_1652638	2021-03-12	HELIX LLC	WHO National Influenza Centre Russian Federation	Andrey Komissarov et al
	Russia/SPE/RII/MH15769S/2021	EPI_ISL_1652639	2021-02-27	HELIX LLC	WHO National Influenza Centre Russian Federation	Andrey Komissarov et al
	Russia/SPE/RII/MH15771S/2021	EPI_ISL_1652640	2021-03-01	HELIX LLC	WHO National Influenza Centre Russian Federation	Andrey Komissarov et al
	Russia/SPE/RII/MH15772S/2021	EPI_ISL_1652641	2021-03-10	HELIX LLC	WHO National Influenza Centre Russian Federation	Andrey Komissarov et al
	Russia/SPE/RII/MH15773S/2021	EPI_ISL_1652642	2021-02-26	HELIX LLC	WHO National Influenza Centre Russian Federation	Andrey Komissarov et al
	Russia/SPE/RII/MH15774S/2021	EPI_ISL_1652643	2021-02-27	HELIX LLC	WHO National Influenza Centre Russian Federation	Andrey Komissarov et al
	Russia/SPE/RII/MH15775S/2021	EPI_ISL_1652644	2021-03-02	HELIX LLC	WHO National Influenza Centre Russian Federation	Andrey Komissarov et al
	Russia/TVE/CRIE/L188M0714hu/2021	EPI_ISL_3101091	2021-05-18	Molecular diagnostic laboratory of Federal Budget Institution of Science "Central Research Institute of Epidemiology" of The Federal Service on Customers' Rights Protection and Human Well/being Surveillance	Group of Genomics and Postgenomic Technologies of Central Research Institute of Epidemiology	Samoilov A.E. et al
	Russia/SPE/RII/MH15779S/2021	EPI_ISL_1652646	2021-03-20	HELIX LLC	WHO National Influenza Centre Russian Federation	Andrey Komissarov et al
	Russia/SPE/RII/MH15780S/2021	EPI_ISL_1652647	2021-03-12	HELIX LLC	WHO National Influenza Centre Russian Federation	Andrey Komissarov et al
	Russia/SPE/RII/MH15782S/2021	EPI_ISL_1652648	2021-03-12	HELIX LLC	WHO National Influenza Centre Russian Federation	Andrey Komissarov et al
	Russia/SPE/RII/MH15783S/2021	EPI_ISL_1652649	2021-03-20	HELIX LLC	WHO National Influenza Centre Russian Federation	Andrey Komissarov et al
	Russia/SPE/RII/MH15784S/2021	EPI_ISL_1652650	2021-03-15	HELIX LLC	WHO National Influenza Centre Russian Federation	Andrey Komissarov et al
	Russia/SPE/RII/MH1597S/2020	EPI_ISL_602339	2020-09-12	HELIX LLC	WHO National Influenza Centre Russian Federation	Andrey Komissarov et al
	Russia/SPE/RII/MH1598S/2020	EPI_ISL_602340	2020-09-13	HELIX LLC	WHO National Influenza Centre Russian Federation	Andrey Komissarov et al
	Russia/SPE/RII/MH1609S/2020	EPI_ISL_596294	2020-09-13	HELIX LCC	WHO National Influenza Centre Russian Federation	Andrey Komissarov et al
	Russia/SPE/RII/MH1616S/2020	EPI_ISL_596297	2020-09-07	HELIX LCC	WHO National Influenza Centre Russian Federation	Andrey Komissarov et al
	Russia/SPE/RII/MH1624S/2020	EPI_ISL_602341	2020-09-09	HELIX LLC	WHO National Influenza Centre Russian Federation	Andrey Komissarov et al
	Russia/MOW/CRIE/D187M0069b/2021	EPI_ISL_3101228	2021-05-19	Molecular diagnostic laboratory of Federal Budget Institution of Science "Central Research Institute of Epidemiology" of The Federal Service on Customers' Rights Protection and Human Well/being Surveillance	Group of Genomics and Postgenomic Technologies of Central Research Institute of Epidemiology	Samoilov A.E. et al
	Russia/SPE/RII/34896S/2021	EPI_ISL_2385183	2021-05-19	WHO National Influenza Centre Russian Federation	WHO National Influenza Centre Russian Federation	Andrey Komissarov et al
	Russia/SPE/RII/MH16263S/2021	EPI_ISL_2245714	2021-04-14	WHO National Influenza Centre Russian Federation	WHO National Influenza Centre Russian Federation	Andrey Komissarov et al
	Russia/SPE/RII/MH16264S/2021	EPI_ISL_2245715	2021-04-19	WHO National Influenza Centre Russian Federation	WHO National Influenza Centre Russian Federation	Andrey Komissarov et al
	Russia/SPE/RII/MH16265S/2021	EPI_ISL_2245716	2021-04-19	WHO National Influenza Centre Russian Federation	WHO National Influenza Centre Russian Federation	Andrey Komissarov et al
	Russia/SPE/RII/MH16266S/2021	EPI_ISL_2245717	2021-04-19	WHO National Influenza Centre Russian Federation	WHO National Influenza Centre Russian Federation	Andrey Komissarov et al
	Russia/SPE/RII/MH16267S/2021	EPI_ISL_2245718	2021-04-15	WHO National Influenza Centre Russian Federation	WHO National Influenza Centre Russian Federation	Andrey Komissarov et al
	Russia/SPE/RII/34973S/2021	EPI_ISL_2385197	2021-05-20	WHO National Influenza Centre Russian Federation	WHO National Influenza Centre Russian Federation	Andrey Komissarov et al
	Russia/SPE/RII/34983S/2021	EPI_ISL_2385200	2021-05-20	WHO National Influenza Centre Russian Federation	WHO National Influenza Centre Russian Federation	Andrey Komissarov et al
	Russia/SPE/RII/MH16270S/2021	EPI_ISL_2245721	2021-04-19	WHO National Influenza Centre Russian Federation	WHO National Influenza Centre Russian Federation	Andrey Komissarov et al
	Russia/SPE/RII/MH16274S/2021	EPI_ISL_2245722	2021-04-19	WHO National Influenza Centre Russian Federation	WHO National Influenza Centre Russian Federation	Andrey Komissarov et al
	Russia/SPE/RII/MH16275S/2021	EPI_ISL_2245723	2021-04-16	WHO National Influenza Centre Russian Federation	WHO National Influenza Centre Russian Federation	Andrey Komissarov et al
	Russia/SPE/RII/MH16280S/2021	EPI_ISL_2245724	2021-04-15	WHO National Influenza Centre Russian Federation	WHO National Influenza Centre Russian Federation	Andrey Komissarov et al
	Russia/SPE/RII/MH16281S/2021	EPI_ISL_2245725	2021-04-15	WHO National Influenza Centre Russian Federation	WHO National Influenza Centre Russian Federation	Andrey Komissarov et al
	Russia/SPE/RII/MH1628S/2020	EPI_ISL_596301	2020-09-07	HELIX LCC	WHO National Influenza Centre Russian Federation	Andrey Komissarov et al
	Russia/SPE/RII/MH16292S/2021	EPI_ISL_2245726	2021-04-15	WHO National Influenza Centre Russian Federation	WHO National Influenza Centre Russian Federation	Andrey Komissarov et al
	Russia/SPE/RII/MH16297S/2021	EPI_ISL_1919575	2021-04-14	WHO National Influenza Centre Russian Federation	WHO National Influenza Centre Russian Federation	Andrey Komissarov et al
	Russia/SPE/RII/MH16298S/2021	EPI_ISL_2245727	2021-04-19	WHO National Influenza Centre Russian Federation	WHO National Influenza Centre Russian Federation	Andrey Komissarov et al
	Russia/SPE/RII/MH16307S/2021	EPI_ISL_2245728	2021-04-18	City Hospital No 40	WHO National Influenza Centre Russian Federation	Andrey Komissarov et al
	Russia/SPE/RII/MH16317S/2021	EPI_ISL_2245729	2021-04-18	City Hospital No 40	WHO National Influenza Centre Russian Federation	Andrey Komissarov et al
	Russia/SPE/RII/MH18719S/2021	EPI_ISL_2523814	2021-05-20	City Hospital No 40	WHO National Influenza Centre Russian Federation	Andrey Komissarov et al
	Russia/SPE/RII/MH18724S/2021	EPI_ISL_2523817	2021-05-20	City Hospital No 40	WHO National Influenza Centre Russian Federation	Andrey Komissarov et al
	Russia/SPE/RII/MH16342S/2021	EPI_ISL_2245732	2021-04-22	City Hospital No 40	WHO National Influenza Centre Russian Federation	Andrey Komissarov et al
	Russia/SPE/RII/MH16352S/2021	EPI_ISL_2245733	2021-04-22	City Hospital No 40	WHO National Influenza Centre Russian Federation	Andrey Komissarov et al
	Russia/SPE/RII/MH16354S/2021	EPI_ISL_2245734	2021-04-22	City Hospital No 40	WHO National Influenza Centre Russian Federation	Andrey Komissarov et al
	Russia/SPE/RII/MH16356S/2021	EPI_ISL_2245735	2021-04-22	City Hospital No 40	WHO National Influenza Centre Russian Federation	Andrey Komissarov et al
	Russia/SPE/RII/34957S/2021	EPI_ISL_2385192	2021-05-21	WHO National Influenza Centre Russian Federation	WHO National Influenza Centre Russian Federation	Andrey Komissarov et al
	Russia/SPE/RII/MH16369S/2021	EPI_ISL_2245737	2021-04-23	City Hospital No 40	WHO National Influenza Centre Russian Federation	Andrey Komissarov et al
	Russia/LIP/CRIE/L188M0003u/2021	EPI_ISL_8189722	2021-05-13	Molecular diagnostic laboratory of Federal Budget Institution of Science "Central Research Institute of Epidemiology" of The Federal Service on Customers' Rights Protection and Human Well/being Surveillance	Group of Genomics and Postgenomic Technologies of Central Research Institute of Epidemiology	Samoilov A.E. et al
	Russia/SPE/RII/35056S/2021	EPI_ISL_2385205	2021-05-21	WHO National Influenza Centre Russian Federation	WHO National Influenza Centre Russian Federation	Andrey Komissarov et al
	Russia/SPE/RII/MH18470S/2021	EPI_ISL_2523581	2021-05-21	WHO National Influenza Centre Russian Federation	WHO National Influenza Centre Russian Federation	Andrey Komissarov et al
	Russia/SPE/RII/MH16462S/2021	EPI_ISL_2245759	2021-04-26	WHO National Influenza Centre Russian Federation	WHO National Influenza Centre Russian Federation	Andrey Komissarov et al
	Russia/SPE/RII/MH16463S/2021	EPI_ISL_2245760	2021-04-26	WHO National Influenza Centre Russian Federation	WHO National Influenza Centre Russian Federation	Andrey Komissarov et al
	Russia/SPE/RII/MH16464S/2021	EPI_ISL_2245761	2021-04-26	WHO National Influenza Centre Russian Federation	WHO National Influenza Centre Russian Federation	Andrey Komissarov et al
	Russia/SPE/RII/MH18743S/2021	EPI_ISL_2523827	2021-05-21	City Hospital No 40	WHO National Influenza Centre Russian Federation	Andrey Komissarov et al
	Russia/SPE/RII/MH16467S/2021	EPI_ISL_2245763	2021-04-24	WHO National Influenza Centre Russian Federation	WHO National Influenza Centre Russian Federation	Andrey Komissarov et al
	Russia/SPE/RII/MH16480S/2021	EPI_ISL_2245764	2021-04-22	WHO National Influenza Centre Russian Federation	WHO National Influenza Centre Russian Federation	Andrey Komissarov et al
	Russia/SPE/RII/35131S/2021	EPI_ISL_2450464	2021-05-22	WHO National Influenza Centre Russian Federation	WHO National Influenza Centre Russian Federation	Andrey Komissarov et al
	Russia/SPE/RII/MH16491S/2021	EPI_ISL_2245766	2021-04-21	WHO National Influenza Centre Russian Federation	WHO National Influenza Centre Russian Federation	Andrey Komissarov et al
	Russia/SPE/RII/MH18481S/2021	EPI_ISL_2523590	2021-05-23	WHO National Influenza Centre Russian Federation	WHO National Influenza Centre Russian Federation	Andrey Komissarov et al
	Russia/SPE/RII/MH16503S/2021	EPI_ISL_2245769	2021-04-27	WHO National Influenza Centre Russian Federation	WHO National Influenza Centre Russian Federation	Andrey Komissarov et al
	Russia/SPE/RII/MH16511S/2021	EPI_ISL_2245771	2021-04-23	WHO National Influenza Centre Russian Federation	WHO National Influenza Centre Russian Federation	Andrey Komissarov et al
	Russia/SPE/RII/MH16514S/2021	EPI_ISL_2245772	2021-04-22	WHO National Influenza Centre Russian Federation	WHO National Influenza Centre Russian Federation	Andrey Komissarov et al
	Russia/MOS/CRIE/L106S0544/2021	EPI_ISL_5307106	2021-05-24	Molecular diagnostic laboratory of Federal Budget Institution of Science "Central Research Institute of Epidemiology" of The Federal Service on Customers' Rights Protection and Human Well/being Surveillance	Group of Genomics and Postgenomic Technologies of Central Research Institute of Epidemiology	Samoilov A.E. et al
	Russia/SPE/RII/MH16551S/2021	EPI_ISL_2245774	2021-04-27	City Hospital No 40	WHO National Influenza Centre Russian Federation	Andrey Komissarov et al
	Russia/SPE/RII/MH16566S/2021	EPI_ISL_2245775	2021-04-27	City Hospital No 40	WHO National Influenza Centre Russian Federation	Andrey Komissarov et al
	Russia/MOW/CRIE/L191S0205u/2021	EPI_ISL_5306908	2021-05-24	Molecular diagnostic laboratory of Federal Budget Institution of Science "Central Research Institute of Epidemiology" of The Federal Service on Customers' Rights Protection and Human Well/being Surveillance	Group of Genomics and Postgenomic Technologies of Central Research Institute of Epidemiology	Samoilov A.E. et al
	Russia/SPE/RII/MH16583S/2021	EPI_ISL_2245777	2021-04-27	City Hospital No 40	WHO National Influenza Centre Russian Federation	Andrey Komissarov et al
	Russia/SPE/RII/MH16594S/2021	EPI_ISL_2245778	2021-04-27	City Hospital No 40	WHO National Influenza Centre Russian Federation	Andrey Komissarov et al
	Russia/SPE/RII/MH17215S/2021	EPI_ISL_2385212	2021-04-15	HELIX LLC	WHO National Influenza Centre Russian Federation	Andrey Komissarov et al
	Russia/SPE/RII/MH17216S/2021	EPI_ISL_2385213	2021-04-12	HELIX LLC	WHO National Influenza Centre Russian Federation	Andrey Komissarov et al
	Russia/SPE/RII/2592S/2021	EPI_ISL_7591216	2021-11-05	WHO National Influenza Centre Russian Federation	WHO National Influenza Centre Russian Federation	Andrey Komissarov et al
	Russia/MOW/RII/MH19474S/2021	EPI_ISL_2899798	2021-05-24	D. I. Ivanovskiy Institute of Virology	WHO National Influenza Centre Russian Federation	Andrey Komissarov et al
	Russia/SPE/RII/MH17221S/2021	EPI_ISL_2385216	2021-04-13	HELIX LLC	WHO National Influenza Centre Russian Federation	Andrey Komissarov et al
	Russia/SPE/RII/MH17223S/2021	EPI_ISL_2385217	2021-05-03	HELIX LLC	WHO National Influenza Centre Russian Federation	Andrey Komissarov et al
	Russia/SPE/RII/MH17224S/2021	EPI_ISL_2385218	2021-04-28	HELIX LLC	WHO National Influenza Centre Russian Federation	Andrey Komissarov et al
	Russia/SPE/RII/MH18540S/2021	EPI_ISL_2523862	2021-05-13	HELIX LLC	WHO National Influenza Centre Russian Federation	Andrey Komissarov et al
	Russia/SPE/RII/MH17227S/2021	EPI_ISL_2385220	2021-05-03	HELIX LLC	WHO National Influenza Centre Russian Federation	Andrey Komissarov et al
	Russia/SPE/RII/MH17228S/2021	EPI_ISL_2385221	2021-04-27	HELIX LLC	WHO National Influenza Centre Russian Federation	Andrey Komissarov et al
	Russia/SPE/RII/MH17229S/2021	EPI_ISL_2385222	2021-04-13	HELIX LLC	WHO National Influenza Centre Russian Federation	Andrey Komissarov et al
	Russia/SPE/RII/MH17232S/2021	EPI_ISL_2385223	2021-04-23	HELIX LLC	WHO National Influenza Centre Russian Federation	Andrey Komissarov et al
	Russia/SPE/RII/MH17234S/2021	EPI_ISL_2385225	2021-04-15	HELIX LLC	WHO National Influenza Centre Russian Federation	Andrey Komissarov et al
	Russia/SPE/RII/2596S/2021	EPI_ISL_7591217	2021-11-05	WHO National Influenza Centre Russian Federation	WHO National Influenza Centre Russian Federation	Andrey Komissarov et al
	Russia/SPE/RII/MH17237S/2021	EPI_ISL_2385228	2021-04-16	HELIX LLC	WHO National Influenza Centre Russian Federation	Andrey Komissarov et al
	Russia/SPE/RII/MH17239S/2021	EPI_ISL_2385229	2021-04-13	HELIX LLC	WHO National Influenza Centre Russian Federation	Andrey Komissarov et al
	Russia/SPE/RII/2597S/2021	EPI_ISL_7591218	2021-11-05	WHO National Influenza Centre Russian Federation	WHO National Influenza Centre Russian Federation	Andrey Komissarov et al
	Russia/MOW/RII/MH19475S/2021	EPI_ISL_2899799	2021-05-24	D. I. Ivanovskiy Institute of Virology	WHO National Influenza Centre Russian Federation	Andrey Komissarov et al
	Russia/SPE/RII/MH17243S/2021	EPI_ISL_2385232	2021-04-26	HELIX LLC	WHO National Influenza Centre Russian Federation	Andrey Komissarov et al
	Russia/SPE/RII/2601S/2021	EPI_ISL_7591219	2021-11-05	WHO National Influenza Centre Russian Federation	WHO National Influenza Centre Russian Federation	Andrey Komissarov et al
	Russia/SPE/RII/MH17246S/2021	EPI_ISL_2385235	2021-04-29	HELIX LLC	WHO National Influenza Centre Russian Federation	Andrey Komissarov et al
	Russia/SPE/RII/MH17247S/2021	EPI_ISL_2385236	2021-04-23	HELIX LLC	WHO National Influenza Centre Russian Federation	Andrey Komissarov et al
	Russia/SPE/RII/MH17249S/2021	EPI_ISL_2385237	2021-04-13	HELIX LLC	WHO National Influenza Centre Russian Federation	Andrey Komissarov et al
	Russia/SPE/RII/MH17250S/2021	EPI_ISL_2385238	2021-04-29	HELIX LLC	WHO National Influenza Centre Russian Federation	Andrey Komissarov et al
	Russia/SPE/RII/35242S/2021	EPI_ISL_2450486	2021-05-24	WHO National Influenza Centre Russian Federation	WHO National Influenza Centre Russian Federation	Andrey Komissarov et al
	Russia/SPE/RII/MH17253S/2021	EPI_ISL_2385240	2021-04-26	HELIX LLC	WHO National Influenza Centre Russian Federation	Andrey Komissarov et al
	Russia/SPE/RII/MH17256S/2021	EPI_ISL_2385241	2021-04-23	HELIX LLC	WHO National Influenza Centre Russian Federation	Andrey Komissarov et al
	Russia/TVE/CRIE/L219F0003u_2496/2021	EPI_ISL_7717078	2021-11-05	Molecular diagnostic laboratory of Federal Budget Institution of Science "Central Research Institute of Epidemiology" of The Federal Service on Customers' Rights Protection and Human Well/being Surveillance	Group of Genomics and Postgenomic Technologies of Central Research Institute of Epidemiology	Samoilov A.E. et al
	Russia/SPE/RII/MH17258S/2021	EPI_ISL_2385243	2021-04-20	HELIX LLC	WHO National Influenza Centre Russian Federation	Andrey Komissarov et al
	Russia/SPE/RII/MH17259S/2021	EPI_ISL_2385244	2021-04-29	HELIX LLC	WHO National Influenza Centre Russian Federation	Andrey Komissarov et al
	Russia/DA/CRIE/L189D0306u_2777/2021	EPI_ISL_7688589	2021-11-06	Molecular diagnostic laboratory of Federal Budget Institution of Science "Central Research Institute of Epidemiology" of The Federal Service on Customers' Rights Protection and Human Well/being Surveillance	Group of Genomics and Postgenomic Technologies of Central Research Institute of Epidemiology	Samoilov A.E. et al
	Russia/SPE/RII/MH17266S/2021	EPI_ISL_2385247	2021-04-26	HELIX LLC	WHO National Influenza Centre Russian Federation	Andrey Komissarov et al
	Russia/SPE/RII/35288S/2021	EPI_ISL_2450494	2021-05-24	WHO National Influenza Centre Russian Federation	WHO National Influenza Centre Russian Federation	Andrey Komissarov et al
	Russia/SPE/RII/MH17269S/2021	EPI_ISL_2385249	2021-05-03	HELIX LLC	WHO National Influenza Centre Russian Federation	Andrey Komissarov et al
	Russia/SPE/RII/MH17271S/2021	EPI_ISL_2385250	2021-04-13	HELIX LLC	WHO National Influenza Centre Russian Federation	Andrey Komissarov et al
	Russia/SPE/RII/MH17272S/2021	EPI_ISL_2385251	2021-04-13	HELIX LLC	WHO National Influenza Centre Russian Federation	Andrey Komissarov et al
	Russia/SPE/RII/MH17274S/2021	EPI_ISL_2385253	2021-04-13	HELIX LLC	WHO National Influenza Centre Russian Federation	Andrey Komissarov et al
	Russia/SPE/RII/MH17275S/2021	EPI_ISL_2385254	2021-04-12	HELIX LLC	WHO National Influenza Centre Russian Federation	Andrey Komissarov et al
	Russia/SPE/RII/MH17276S/2021	EPI_ISL_2385255	2021-04-26	HELIX LLC	WHO National Influenza Centre Russian Federation	Andrey Komissarov et al
	Russia/SPE/RII/MH18764S/2021	EPI_ISL_2523843	2021-05-24	City Hospital No 40	WHO National Influenza Centre Russian Federation	Andrey Komissarov et al
	Russia/SPE/RII/MH17279S/2021	EPI_ISL_2385257	2021-04-27	HELIX LLC	WHO National Influenza Centre Russian Federation	Andrey Komissarov et al
	Russia/MOW/CRIE/L189S0254u/2021	EPI_ISL_5306904	2021-05-25	Molecular diagnostic laboratory of Federal Budget Institution of Science "Central Research Institute of Epidemiology" of The Federal Service on Customers' Rights Protection and Human Well/being Surveillance	Group of Genomics and Postgenomic Technologies of Central Research Institute of Epidemiology	Samoilov A.E. et al
	Russia/SPE/RII/MH17281S/2021	EPI_ISL_2385259	2021-05-06	HELIX LLC	WHO National Influenza Centre Russian Federation	Andrey Komissarov et al
	Russia/SPE/RII/MH17282S/2021	EPI_ISL_2385260	2021-04-26	HELIX LLC	WHO National Influenza Centre Russian Federation	Andrey Komissarov et al
	Russia/SPE/RII/35283S/2021	EPI_ISL_2450492	2021-05-25	WHO National Influenza Centre Russian Federation	WHO National Influenza Centre Russian Federation	Andrey Komissarov et al
	Russia/SPE/RII/MH17284S/2021	EPI_ISL_2385262	2021-04-12	HELIX LLC	WHO National Influenza Centre Russian Federation	Andrey Komissarov et al
	Russia/SPE/RII/MH17285S/2021	EPI_ISL_2385263	2021-04-23	HELIX LLC	WHO National Influenza Centre Russian Federation	Andrey Komissarov et al
	Russia/SPE/RII/MH17287S/2021	EPI_ISL_2385264	2021-05-03	HELIX LLC	WHO National Influenza Centre Russian Federation	Andrey Komissarov et al
	Russia/SPE/RII/MH17288S/2021	EPI_ISL_2385265	2021-04-27	HELIX LLC	WHO National Influenza Centre Russian Federation	Andrey Komissarov et al
	Russia/KB/CRIE/L189D0201u_6175/2021	EPI_ISL_7688579	2021-11-06	Molecular diagnostic laboratory of Federal Budget Institution of Science "Central Research Institute of Epidemiology" of The Federal Service on Customers' Rights Protection and Human Well/being Surveillance	Group of Genomics and Postgenomic Technologies of Central Research Institute of Epidemiology	Samoilov A.E. et al
	Russia/KB/CRIE/L189D0237u_9039/2021	EPI_ISL_7688580	2021-11-06	Molecular diagnostic laboratory of Federal Budget Institution of Science "Central Research Institute of Epidemiology" of The Federal Service on Customers' Rights Protection and Human Well/being Surveillance	Group of Genomics and Postgenomic Technologies of Central Research Institute of Epidemiology	Samoilov A.E. et al
	Russia/SPE/RII/MH17292S/2021	EPI_ISL_2385268	2021-04-29	HELIX LLC	WHO National Influenza Centre Russian Federation	Andrey Komissarov et al
	Russia/SPE/RII/MH17293S/2021	EPI_ISL_2385269	2021-04-27	HELIX LLC	WHO National Influenza Centre Russian Federation	Andrey Komissarov et al
	Russia/SPE/RII/35343S/2021	EPI_ISL_2450500	2021-05-25	WHO National Influenza Centre Russian Federation	WHO National Influenza Centre Russian Federation	Andrey Komissarov et al
	Russia/SPE/RII/MH17295S/2021	EPI_ISL_2385271	2021-04-13	HELIX LLC	WHO National Influenza Centre Russian Federation	Andrey Komissarov et al
	Russia/SPE/RII/MH17297S/2021	EPI_ISL_2385272	2021-05-03	HELIX LLC	WHO National Influenza Centre Russian Federation	Andrey Komissarov et al
	Russia/SPE/RII/MH17298S/2021	EPI_ISL_2385273	2021-05-02	HELIX LLC	WHO National Influenza Centre Russian Federation	Andrey Komissarov et al
	Russia/SPE/RII/35365S/2021	EPI_ISL_2450507	2021-05-25	WHO National Influenza Centre Russian Federation	WHO National Influenza Centre Russian Federation	Andrey Komissarov et al
	Russia/SPE/RII/MH17300S/2021	EPI_ISL_2385275	2021-05-06	HELIX LLC	WHO National Influenza Centre Russian Federation	Andrey Komissarov et al
	Russia/SPE/RII/35380S/2021	EPI_ISL_5263336	2021-05-26	WHO National Influenza Centre Russian Federation	WHO National Influenza Centre Russian Federation	Andrey Komissarov et al
	Russia/SPE/RII/MH17305S/2021	EPI_ISL_2385278	2021-05-02	HELIX LLC	WHO National Influenza Centre Russian Federation	Andrey Komissarov et al
	Russia/KB/CRIE/L191D0053u_5295/2021	EPI_ISL_7688581	2021-11-06	Molecular diagnostic laboratory of Federal Budget Institution of Science "Central Research Institute of Epidemiology" of The Federal Service on Customers' Rights Protection and Human Well/being Surveillance	Group of Genomics and Postgenomic Technologies of Central Research Institute of Epidemiology	Samoilov A.E. et al
	Russia/KB/CRIE/L191D0061u_5373/2021	EPI_ISL_7688582	2021-11-06	Molecular diagnostic laboratory of Federal Budget Institution of Science "Central Research Institute of Epidemiology" of The Federal Service on Customers' Rights Protection and Human Well/being Surveillance	Group of Genomics and Postgenomic Technologies of Central Research Institute of Epidemiology	Samoilov A.E. et al
	Russia/SPE/RII/MH17308S/2021	EPI_ISL_2385281	2021-04-13	HELIX LLC	WHO National Influenza Centre Russian Federation	Andrey Komissarov et al
	Russia/SPE/RII/35610S/2021	EPI_ISL_5263338	2021-05-26	WHO National Influenza Centre Russian Federation	WHO National Influenza Centre Russian Federation	Andrey Komissarov et al
	Russia/SPE/RII/MH17316S/2021	EPI_ISL_2385283	2021-05-06	HELIX LLC	WHO National Influenza Centre Russian Federation	Andrey Komissarov et al
	Russia/MOS/CRIE/L106D0303u_3825/2021	EPI_ISL_7688350	2021-11-06	Molecular diagnostic laboratory of Federal Budget Institution of Science "Central Research Institute of Epidemiology" of The Federal Service on Customers' Rights Protection and Human Well/being Surveillance	Group of Genomics and Postgenomic Technologies of Central Research Institute of Epidemiology	Samoilov A.E. et al
	Russia/SPE/RII/MH17318S/2021	EPI_ISL_2385285	2021-05-06	HELIX LLC	WHO National Influenza Centre Russian Federation	Andrey Komissarov et al
	Russia/SPE/RII/MH17319S/2021	EPI_ISL_2385286	2021-05-06	HELIX LLC	WHO National Influenza Centre Russian Federation	Andrey Komissarov et al
	Russia/SPE/RII/MH17320S/2021	EPI_ISL_2385287	2021-04-23	HELIX LLC	WHO National Influenza Centre Russian Federation	Andrey Komissarov et al
	Russia/MOS/CRIE/L106D0384u_2890/2021	EPI_ISL_7688352	2021-11-06	Molecular diagnostic laboratory of Federal Budget Institution of Science "Central Research Institute of Epidemiology" of The Federal Service on Customers' Rights Protection and Human Well/being Surveillance	Group of Genomics and Postgenomic Technologies of Central Research Institute of Epidemiology	Samoilov A.E. et al
	Russia/SPE/RII/MH17325S/2021	EPI_ISL_2385289	2021-05-06	HELIX LLC	WHO National Influenza Centre Russian Federation	Andrey Komissarov et al
	Russia/SPE/RII/35616S/2021	EPI_ISL_2450515	2021-05-26	WHO National Influenza Centre Russian Federation	WHO National Influenza Centre Russian Federation	Andrey Komissarov et al
	Russia/MOW/CRIE/L189T1074ubh/2021	EPI_ISL_3508127	2021-05-27	Molecular diagnostic laboratory of Federal Budget Institution of Science "Central Research Institute of Epidemiology" of The Federal Service on Customers' Rights Protection and Human Well/being Surveillance	Group of Genomics and Postgenomic Technologies of Central Research Institute of Epidemiology	Samoilov A.E. et al
	Russia/MOS/CRIE/L106D0399u_1722/2021	EPI_ISL_7688353	2021-11-06	Molecular diagnostic laboratory of Federal Budget Institution of Science "Central Research Institute of Epidemiology" of The Federal Service on Customers' Rights Protection and Human Well/being Surveillance	Group of Genomics and Postgenomic Technologies of Central Research Institute of Epidemiology	Samoilov A.E. et al
	Russia/SPE/RII/MH17332S/2021	EPI_ISL_2385293	2021-04-23	HELIX LLC	WHO National Influenza Centre Russian Federation	Andrey Komissarov et al
	Russia/SPE/RII/MH17333S/2021	EPI_ISL_2385294	2021-05-03	HELIX LLC	WHO National Influenza Centre Russian Federation	Andrey Komissarov et al
	Russia/NGR/RII/MH19424S/2021	EPI_ISL_2899770	2021-05-27	HELIX LLC	WHO National Influenza Centre Russian Federation	Andrey Komissarov et al
	Russia/SPE/RII/MH17335S/2021	EPI_ISL_2385296	2021-05-06	HELIX LLC	WHO National Influenza Centre Russian Federation	Andrey Komissarov et al
	Russia/SPE/RII/MH17337S/2021	EPI_ISL_2385297	2021-05-03	HELIX LLC	WHO National Influenza Centre Russian Federation	Andrey Komissarov et al
	Russia/SPE/RII/MH17338S/2021	EPI_ISL_2385298	2021-04-23	HELIX LLC	WHO National Influenza Centre Russian Federation	Andrey Komissarov et al
	Russia/SPE/RII/MH17340S/2021	EPI_ISL_2385299	2021-05-03	HELIX LLC	WHO National Influenza Centre Russian Federation	Andrey Komissarov et al
	Russia/SPE/RII/MH17341S/2021	EPI_ISL_2385300	2021-05-03	HELIX LLC	WHO National Influenza Centre Russian Federation	Andrey Komissarov et al
	Russia/SPE/RII/MH17342S/2021	EPI_ISL_2385301	2021-05-03	HELIX LLC	WHO National Influenza Centre Russian Federation	Andrey Komissarov et al
	Russia/MOW/CRIE/L188B0032bhu/2021	EPI_ISL_8189485	2021-05-28	Molecular diagnostic laboratory of Federal Budget Institution of Science "Central Research Institute of Epidemiology" of The Federal Service on Customers' Rights Protection and Human Well/being Surveillance	Group of Genomics and Postgenomic Technologies of Central Research Institute of Epidemiology	Samoilov A.E. et al
	Russia/SPE/RII/MH17344S/2021	EPI_ISL_2385303	2021-04-23	HELIX LLC	WHO National Influenza Centre Russian Federation	Andrey Komissarov et al
	Russia/SPE/RII/MH17345S/2021	EPI_ISL_2385304	2021-05-03	HELIX LLC	WHO National Influenza Centre Russian Federation	Andrey Komissarov et al
	Russia/MOS/CRIE/L106D0452u_1183/2021	EPI_ISL_7688354	2021-11-06	Molecular diagnostic laboratory of Federal Budget Institution of Science "Central Research Institute of Epidemiology" of The Federal Service on Customers' Rights Protection and Human Well/being Surveillance	Group of Genomics and Postgenomic Technologies of Central Research Institute of Epidemiology	Samoilov A.E. et al
	Russia/SPE/RII/MH17347S/2021	EPI_ISL_2385306	2021-04-23	HELIX LLC	WHO National Influenza Centre Russian Federation	Andrey Komissarov et al
	Russia/SPE/RII/MH17348S/2021	EPI_ISL_2385307	2021-04-27	HELIX LLC	WHO National Influenza Centre Russian Federation	Andrey Komissarov et al
	Russia/MOS/CRIE/L106D0462u_1257/2021	EPI_ISL_7688355	2021-11-06	Molecular diagnostic laboratory of Federal Budget Institution of Science "Central Research Institute of Epidemiology" of The Federal Service on Customers' Rights Protection and Human Well/being Surveillance	Group of Genomics and Postgenomic Technologies of Central Research Institute of Epidemiology	Samoilov A.E. et al
	Russia/SPE/RII/MH17350S/2021	EPI_ISL_2385309	2021-05-06	WHO National Influenza Centre Russian Federation	WHO National Influenza Centre Russian Federation	Andrey Komissarov et al
	Russia/SPE/RII/MH17351S/2021	EPI_ISL_2385310	2021-05-05	WHO National Influenza Centre Russian Federation	WHO National Influenza Centre Russian Federation	Andrey Komissarov et al
	Russia/MOS/CRIE/L106D0472_1242/2021	EPI_ISL_7688356	2021-11-06	Molecular diagnostic laboratory of Federal Budget Institution of Science "Central Research Institute of Epidemiology" of The Federal Service on Customers' Rights Protection and Human Well/being Surveillance	Group of Genomics and Postgenomic Technologies of Central Research Institute of Epidemiology	Samoilov A.E. et al
	Russia/MOW/CRIE/L188B0043bh/2021	EPI_ISL_8189498	2021-05-28	Molecular diagnostic laboratory of Federal Budget Institution of Science "Central Research Institute of Epidemiology" of The Federal Service on Customers' Rights Protection and Human Well/being Surveillance	Group of Genomics and Postgenomic Technologies of Central Research Institute of Epidemiology	Samoilov A.E. et al
	Russia/SPE/RII/MH18660S/2021	EPI_ISL_2523752	2021-05-28	WHO National Influenza Centre Russian Federation	WHO National Influenza Centre Russian Federation	Andrey Komissarov et al
	Russia/SPE/RII/MH17363S/2021	EPI_ISL_2385317	2021-05-06	WHO National Influenza Centre Russian Federation	WHO National Influenza Centre Russian Federation	Andrey Komissarov et al
	Russia/MOS/CRIE/L106D0505u_0597/2021	EPI_ISL_7688360	2021-11-06	Molecular diagnostic laboratory of Federal Budget Institution of Science "Central Research Institute of Epidemiology" of The Federal Service on Customers' Rights Protection and Human Well/being Surveillance	Group of Genomics and Postgenomic Technologies of Central Research Institute of Epidemiology	Samoilov A.E. et al
	Russia/SPE/RII/MH17367S/2021	EPI_ISL_2385320	2021-05-08	WHO National Influenza Centre Russian Federation	WHO National Influenza Centre Russian Federation	Andrey Komissarov et al
	Russia/SPE/RII/MH17370S/2021	EPI_ISL_2385321	2021-05-08	WHO National Influenza Centre Russian Federation	WHO National Influenza Centre Russian Federation	Andrey Komissarov et al
	Russia/SPE/RII/MH17371S/2021	EPI_ISL_2385322	2021-05-08	WHO National Influenza Centre Russian Federation	WHO National Influenza Centre Russian Federation	Andrey Komissarov et al
	Russia/MOS/CRIE/L106D0520u_2136/2021	EPI_ISL_8528748	2021-11-06	Molecular diagnostic laboratory of Federal Budget Institution of Science "Central Research Institute of Epidemiology" of The Federal Service on Customers' Rights Protection and Human Well/being Surveillance	Group of Genomics and Postgenomic Technologies of Central Research Institute of Epidemiology	Samoilov A.E. et al
	Russia/MOS/CRIE/L106D0521u_0623/2021	EPI_ISL_7688361	2021-11-06	Molecular diagnostic laboratory of Federal Budget Institution of Science "Central Research Institute of Epidemiology" of The Federal Service on Customers' Rights Protection and Human Well/being Surveillance	Group of Genomics and Postgenomic Technologies of Central Research Institute of Epidemiology	Samoilov A.E. et al
	Russia/SPE/RII/MH17376S/2021	EPI_ISL_2385325	2021-05-10	WHO National Influenza Centre Russian Federation	WHO National Influenza Centre Russian Federation	Andrey Komissarov et al
	Russia/SPE/RII/MH17378S/2021	EPI_ISL_2385327	2021-05-09	WHO National Influenza Centre Russian Federation	WHO National Influenza Centre Russian Federation	Andrey Komissarov et al
	Russia/SPE/RII/MH17381S/2021	EPI_ISL_2385328	2021-05-11	WHO National Influenza Centre Russian Federation	WHO National Influenza Centre Russian Federation	Andrey Komissarov et al
	Russia/MUR/CRIE/L189Z0026bh/2021	EPI_ISL_3101329	2021-05-29	Molecular diagnostic laboratory of Federal Budget Institution of Science "Central Research Institute of Epidemiology" of The Federal Service on Customers' Rights Protection and Human Well/being Surveillance	Group of Genomics and Postgenomic Technologies of Central Research Institute of Epidemiology	Samoilov A.E. et al
	Russia/SPE/RII/35882S/2021	EPI_ISL_2523457	2021-05-29	WHO National Influenza Centre Russian Federation	WHO National Influenza Centre Russian Federation	Andrey Komissarov et al
	Russia/MOS/CRIE/L188B0205b/2021	EPI_ISL_3508125	2021-05-31	Molecular diagnostic laboratory of Federal Budget Institution of Science "Central Research Institute of Epidemiology" of The Federal Service on Customers' Rights Protection and Human Well/being Surveillance	Group of Genomics and Postgenomic Technologies of Central Research Institute of Epidemiology	Samoilov A.E. et al
	Russia/MOS/CRIE/L188B0206ub/2021	EPI_ISL_3508126	2021-06-02	Molecular diagnostic laboratory of Federal Budget Institution of Science "Central Research Institute of Epidemiology" of The Federal Service on Customers' Rights Protection and Human Well/being Surveillance	Group of Genomics and Postgenomic Technologies of Central Research Institute of Epidemiology	Samoilov A.E. et al
	Russia/MOS/CRIE/L106D0524u_2250/2021	EPI_ISL_7688362	2021-11-06	Molecular diagnostic laboratory of Federal Budget Institution of Science "Central Research Institute of Epidemiology" of The Federal Service on Customers' Rights Protection and Human Well/being Surveillance	Group of Genomics and Postgenomic Technologies of Central Research Institute of Epidemiology	Samoilov A.E. et al
	Russia/SPE/RII/36374S/2021	EPI_ISL_2698439	2021-06-03	WHO National Influenza Centre Russian Federation	WHO National Influenza Centre Russian Federation	Andrey Komissarov et al
	Russia/SPE/RII/36525S/2021	EPI_ISL_2698499	2021-06-04	WHO National Influenza Centre Russian Federation	WHO National Influenza Centre Russian Federation	Andrey Komissarov et al
	Russia/SPE/RII/MH17390S/2021	EPI_ISL_2385336	2021-05-10	WHO National Influenza Centre Russian Federation	WHO National Influenza Centre Russian Federation	Andrey Komissarov et al
	Russia/SPE/RII/MH17769S/2021	EPI_ISL_2385426	2021-05-12	WHO National Influenza Centre Russian Federation	WHO National Influenza Centre Russian Federation	Andrey Komissarov et al
	Russia/SPE/RII/MH17770S/2021	EPI_ISL_2385427	2021-05-12	WHO National Influenza Centre Russian Federation	WHO National Influenza Centre Russian Federation	Andrey Komissarov et al
	Russia/MOS/CRIE/L106D0532u_2311/2021	EPI_ISL_7688363	2021-11-06	Molecular diagnostic laboratory of Federal Budget Institution of Science "Central Research Institute of Epidemiology" of The Federal Service on Customers' Rights Protection and Human Well/being Surveillance	Group of Genomics and Postgenomic Technologies of Central Research Institute of Epidemiology	Samoilov A.E. et al
	Russia/SPE/RII/MH17773S/2021	EPI_ISL_2385429	2021-05-12	WHO National Influenza Centre Russian Federation	WHO National Influenza Centre Russian Federation	Andrey Komissarov et al
	Russia/SPE/RII/MH19419S/2021	EPI_ISL_2899766	2021-06-04	HELIX LLC	WHO National Influenza Centre Russian Federation	Andrey Komissarov et al
	Russia/SPE/RII/MH17811S/2021	EPI_ISL_2450533	2021-05-15	WHO National Influenza Centre Russian Federation	WHO National Influenza Centre Russian Federation	Andrey Komissarov et al
	Russia/SPE/RII/MH17818S/2021	EPI_ISL_2450534	2021-05-17	WHO National Influenza Centre Russian Federation	WHO National Influenza Centre Russian Federation	Andrey Komissarov et al
	Russia/MOS/CRIE/L106D1191u_4583/2021	EPI_ISL_7717251	2021-11-06	Molecular diagnostic laboratory of Federal Budget Institution of Science "Central Research Institute of Epidemiology" of The Federal Service on Customers' Rights Protection and Human Well/being Surveillance	Group of Genomics and Postgenomic Technologies of Central Research Institute of Epidemiology	Samoilov A.E. et al
	Russia/MOS/CRIE/L191D1093u_6098/2021	EPI_ISL_7688403	2021-11-06	Molecular diagnostic laboratory of Federal Budget Institution of Science "Central Research Institute of Epidemiology" of The Federal Service on Customers' Rights Protection and Human Well/being Surveillance	Group of Genomics and Postgenomic Technologies of Central Research Institute of Epidemiology	Samoilov A.E. et al
	Russia/SPE/RII/MH17828S/2021	EPI_ISL_2450537	2021-05-18	WHO National Influenza Centre Russian Federation	WHO National Influenza Centre Russian Federation	Andrey Komissarov et al
	Russia/MOW/CRIE/L191D0941u_8952/2021	EPI_ISL_7688517	2021-11-06	Molecular diagnostic laboratory of Federal Budget Institution of Science "Central Research Institute of Epidemiology" of The Federal Service on Customers' Rights Protection and Human Well/being Surveillance	Group of Genomics and Postgenomic Technologies of Central Research Institute of Epidemiology	Samoilov A.E. et al
	Russia/SPE/RII/MH17831S/2021	EPI_ISL_2450539	2021-05-18	WHO National Influenza Centre Russian Federation	WHO National Influenza Centre Russian Federation	Andrey Komissarov et al
	Russia/MUR/CRIE/L191D0222u_8451/2021	EPI_ISL_7688343	2021-11-06	Molecular diagnostic laboratory of Federal Budget Institution of Science "Central Research Institute of Epidemiology" of The Federal Service on Customers' Rights Protection and Human Well/being Surveillance	Group of Genomics and Postgenomic Technologies of Central Research Institute of Epidemiology	Samoilov A.E. et al
	Russia/MUR/RII/MH38326S/2021	EPI_ISL_6831924	2021-11-06	HELIX LLC	WHO National Influenza Centre Russian Federation	Andrey Komissarov et al
	Russia/ROS/CRIE/L191D0360u_8279/2021	EPI_ISL_7688331	2021-11-06	Molecular diagnostic laboratory of Federal Budget Institution of Science "Central Research Institute of Epidemiology" of The Federal Service on Customers' Rights Protection and Human Well/being Surveillance	Group of Genomics and Postgenomic Technologies of Central Research Institute of Epidemiology	Samoilov A.E. et al
	Russia/MOW/CRIE/L188F0228/2021	EPI_ISL_8189512	2021-06-06	Molecular diagnostic laboratory of Federal Budget Institution of Science "Central Research Institute of Epidemiology" of The Federal Service on Customers' Rights Protection and Human Well/being Surveillance	Group of Genomics and Postgenomic Technologies of Central Research Institute of Epidemiology	Samoilov A.E. et al
	Russia/RYA/CRIE/L189D2277u_0616/2021	EPI_ISL_7688323	2021-11-06	Molecular diagnostic laboratory of Federal Budget Institution of Science "Central Research Institute of Epidemiology" of The Federal Service on Customers' Rights Protection and Human Well/being Surveillance	Group of Genomics and Postgenomic Technologies of Central Research Institute of Epidemiology	Samoilov A.E. et al
	Russia/SPE/RII/MH18023S/2021	EPI_ISL_2450545	2021-05-12	City Hospital No 40	WHO National Influenza Centre Russian Federation	Andrey Komissarov et al
	Russia/MOW/CRIE/L188K0759/2021	EPI_ISL_3919586	2021-06-08	Molecular diagnostic laboratory of Federal Budget Institution of Science "Central Research Institute of Epidemiology" of The Federal Service on Customers' Rights Protection and Human Well/being Surveillance	Group of Genomics and Postgenomic Technologies of Central Research Institute of Epidemiology	Samoilov A.E. et al
	Russia/SPE/RII/MH18039S/2021	EPI_ISL_2450547	2021-05-12	City Hospital No 40	WHO National Influenza Centre Russian Federation	Andrey Komissarov et al
	Russia/SPE/RII/MH18048S/2021	EPI_ISL_2450548	2021-05-12	City Hospital No 40	WHO National Influenza Centre Russian Federation	Andrey Komissarov et al
	Russia/SPE/RII/MH18054S/2021	EPI_ISL_2450549	2021-05-12	City Hospital No 40	WHO National Influenza Centre Russian Federation	Andrey Komissarov et al
	Russia/RYA/CRIE/L219F0049u_8033/2021	EPI_ISL_7717105	2021-11-06	Molecular diagnostic laboratory of Federal Budget Institution of Science "Central Research Institute of Epidemiology" of The Federal Service on Customers' Rights Protection and Human Well/being Surveillance	Group of Genomics and Postgenomic Technologies of Central Research Institute of Epidemiology	Samoilov A.E. et al
	Russia/SPE/RII/MH38337S/2021	EPI_ISL_6831927	2021-11-06	HELIX LLC	WHO National Influenza Centre Russian Federation	Andrey Komissarov et al
	Russia/SPE/RII/MH18101S/2021	EPI_ISL_2450552	2021-05-16	City Hospital No 40	WHO National Influenza Centre Russian Federation	Andrey Komissarov et al
	Russia/TUL/CRIE/L189D2752u_6514/2021	EPI_ISL_7688310	2021-11-06	Molecular diagnostic laboratory of Federal Budget Institution of Science "Central Research Institute of Epidemiology" of The Federal Service on Customers' Rights Protection and Human Well/being Surveillance	Group of Genomics and Postgenomic Technologies of Central Research Institute of Epidemiology	Samoilov A.E. et al
	Russia/TUL/CRIE/L189D2760u_9173/2021	EPI_ISL_7717354	2021-11-06	Molecular diagnostic laboratory of Federal Budget Institution of Science "Central Research Institute of Epidemiology" of The Federal Service on Customers' Rights Protection and Human Well/being Surveillance	Group of Genomics and Postgenomic Technologies of Central Research Institute of Epidemiology	Samoilov A.E. et al
	Russia/SPE/RII/MH18141S/2021	EPI_ISL_2450555	2021-05-17	City Hospital No 40	WHO National Influenza Centre Russian Federation	Andrey Komissarov et al
	Russia/SPE/RII/MH18142S/2021	EPI_ISL_2450556	2021-05-17	City Hospital No 40	WHO National Influenza Centre Russian Federation	Andrey Komissarov et al
	Russia/SPE/RII/MH18151S/2021	EPI_ISL_2450557	2021-05-17	City Hospital No 40	WHO National Influenza Centre Russian Federation	Andrey Komissarov et al
	Russia/SPE/RII/MH18153S/2021	EPI_ISL_2450558	2021-05-17	City Hospital No 40	WHO National Influenza Centre Russian Federation	Andrey Komissarov et al
	Russia/TVE/CRIE/L219F0002u_2653/2021	EPI_ISL_7717077	2021-11-06	Molecular diagnostic laboratory of Federal Budget Institution of Science "Central Research Institute of Epidemiology" of The Federal Service on Customers' Rights Protection and Human Well/being Surveillance	Group of Genomics and Postgenomic Technologies of Central Research Institute of Epidemiology	Samoilov A.E. et al
	Russia/TVE/CRIE/L219F0005u_2579/2021	EPI_ISL_7717079	2021-11-06	Molecular diagnostic laboratory of Federal Budget Institution of Science "Central Research Institute of Epidemiology" of The Federal Service on Customers' Rights Protection and Human Well/being Surveillance	Group of Genomics and Postgenomic Technologies of Central Research Institute of Epidemiology	Samoilov A.E. et al
	Russia/TYU/CRIE/L189D0762u_7675/2021	EPI_ISL_7688309	2021-11-06	Molecular diagnostic laboratory of Federal Budget Institution of Science "Central Research Institute of Epidemiology" of The Federal Service on Customers' Rights Protection and Human Well/being Surveillance	Group of Genomics and Postgenomic Technologies of Central Research Institute of Epidemiology	Samoilov A.E. et al
	Russia/BRY/CRIE/L189D2810u_2658/2021	EPI_ISL_7717356	2021-11-07	Molecular diagnostic laboratory of Federal Budget Institution of Science "Central Research Institute of Epidemiology" of The Federal Service on Customers' Rights Protection and Human Well/being Surveillance	Group of Genomics and Postgenomic Technologies of Central Research Institute of Epidemiology	Samoilov A.E. et al
	Russia/SPE/RII/MH18162S/2021	EPI_ISL_2450562	2021-05-17	City Hospital No 40	WHO National Influenza Centre Russian Federation	Andrey Komissarov et al
	Russia/DA/CRIE/L191D1281u_2972/2021	EPI_ISL_7688588	2021-11-07	Molecular diagnostic laboratory of Federal Budget Institution of Science "Central Research Institute of Epidemiology" of The Federal Service on Customers' Rights Protection and Human Well/being Surveillance	Group of Genomics and Postgenomic Technologies of Central Research Institute of Epidemiology	Samoilov A.E. et al
	Russia/SPE/RII/MH18181S/2021	EPI_ISL_2450564	2021-05-17	City Hospital No 40	WHO National Influenza Centre Russian Federation	Andrey Komissarov et al
	Russia/KLU/CRIE/L106D0597u_3331/2021	EPI_ISL_7688572	2021-11-07	Molecular diagnostic laboratory of Federal Budget Institution of Science "Central Research Institute of Epidemiology" of The Federal Service on Customers' Rights Protection and Human Well/being Surveillance	Group of Genomics and Postgenomic Technologies of Central Research Institute of Epidemiology	Samoilov A.E. et al
	Russia/KLU/CRIE/L106D0626u_0532/2021	EPI_ISL_7688573	2021-11-07	Molecular diagnostic laboratory of Federal Budget Institution of Science "Central Research Institute of Epidemiology" of The Federal Service on Customers' Rights Protection and Human Well/being Surveillance	Group of Genomics and Postgenomic Technologies of Central Research Institute of Epidemiology	Samoilov A.E. et al
	Russia/KLU/CRIE/L106D0638u_9644/2021	EPI_ISL_7688574	2021-11-07	Molecular diagnostic laboratory of Federal Budget Institution of Science "Central Research Institute of Epidemiology" of The Federal Service on Customers' Rights Protection and Human Well/being Surveillance	Group of Genomics and Postgenomic Technologies of Central Research Institute of Epidemiology	Samoilov A.E. et al
	Russia/MAG/CRIE/L219L0034u_6591/2021	EPI_ISL_7688559	2021-11-07	Molecular diagnostic laboratory of Federal Budget Institution of Science "Central Research Institute of Epidemiology" of The Federal Service on Customers' Rights Protection and Human Well/being Surveillance	Group of Genomics and Postgenomic Technologies of Central Research Institute of Epidemiology	Samoilov A.E. et al
	Russia/MOS/CRIE/L106D0173u_2372/2021	EPI_ISL_7688347	2021-11-07	Molecular diagnostic laboratory of Federal Budget Institution of Science "Central Research Institute of Epidemiology" of The Federal Service on Customers' Rights Protection and Human Well/being Surveillance	Group of Genomics and Postgenomic Technologies of Central Research Institute of Epidemiology	Samoilov A.E. et al
	Russia/MOS/CRIE/L106D0238u_6736/2021	EPI_ISL_8528747	2021-11-07	Molecular diagnostic laboratory of Federal Budget Institution of Science "Central Research Institute of Epidemiology" of The Federal Service on Customers' Rights Protection and Human Well/being Surveillance	Group of Genomics and Postgenomic Technologies of Central Research Institute of Epidemiology	Samoilov A.E. et al
	Russia/MOS/CRIE/L106D0239u_7557/2021	EPI_ISL_7688348	2021-11-07	Molecular diagnostic laboratory of Federal Budget Institution of Science "Central Research Institute of Epidemiology" of The Federal Service on Customers' Rights Protection and Human Well/being Surveillance	Group of Genomics and Postgenomic Technologies of Central Research Institute of Epidemiology	Samoilov A.E. et al
	Russia/MOS/CRIE/L106D0243u_4392/2021	EPI_ISL_7688349	2021-11-07	Molecular diagnostic laboratory of Federal Budget Institution of Science "Central Research Institute of Epidemiology" of The Federal Service on Customers' Rights Protection and Human Well/being Surveillance	Group of Genomics and Postgenomic Technologies of Central Research Institute of Epidemiology	Samoilov A.E. et al
	Russia/MOS/CRIE/L106D0306u_1559/2021	EPI_ISL_7688351	2021-11-07	Molecular diagnostic laboratory of Federal Budget Institution of Science "Central Research Institute of Epidemiology" of The Federal Service on Customers' Rights Protection and Human Well/being Surveillance	Group of Genomics and Postgenomic Technologies of Central Research Institute of Epidemiology	Samoilov A.E. et al
	Russia/KGD/RII/MH25950S/2021	EPI_ISL_3122910	2021-06-09	Kaliningrad Region Infectious Diseases Hospital	WHO National Influenza Centre Russian Federation	Andrey Komissarov et al
	Russia/MOS/CRIE/L106D0488u_1454/2021	EPI_ISL_7688357	2021-11-07	Molecular diagnostic laboratory of Federal Budget Institution of Science "Central Research Institute of Epidemiology" of The Federal Service on Customers' Rights Protection and Human Well/being Surveillance	Group of Genomics and Postgenomic Technologies of Central Research Institute of Epidemiology	Samoilov A.E. et al
	Russia/MOS/CRIE/L106D0493u_1454/2021	EPI_ISL_7688358	2021-11-07	Molecular diagnostic laboratory of Federal Budget Institution of Science "Central Research Institute of Epidemiology" of The Federal Service on Customers' Rights Protection and Human Well/being Surveillance	Group of Genomics and Postgenomic Technologies of Central Research Institute of Epidemiology	Samoilov A.E. et al
	Russia/MOW/RII/MH20219S/2021	EPI_ISL_2816239	2021-06-10	Infectious Diseases Hospital No 2	WHO National Influenza Centre Russian Federation	Andrey Komissarov et al
	Russia/MOS/CRIE/L106D0497u_7613/2021	EPI_ISL_7688359	2021-11-07	Molecular diagnostic laboratory of Federal Budget Institution of Science "Central Research Institute of Epidemiology" of The Federal Service on Customers' Rights Protection and Human Well/being Surveillance	Group of Genomics and Postgenomic Technologies of Central Research Institute of Epidemiology	Samoilov A.E. et al
	Russia/MOS/CRIE/L189D0794u_3132/2021	EPI_ISL_7688386	2021-11-07	Molecular diagnostic laboratory of Federal Budget Institution of Science "Central Research Institute of Epidemiology" of The Federal Service on Customers' Rights Protection and Human Well/being Surveillance	Group of Genomics and Postgenomic Technologies of Central Research Institute of Epidemiology	Samoilov A.E. et al
	Russia/MOS/CRIE/L189D0851u_5594/2021	EPI_ISL_8528749	2021-11-07	Molecular diagnostic laboratory of Federal Budget Institution of Science "Central Research Institute of Epidemiology" of The Federal Service on Customers' Rights Protection and Human Well/being Surveillance	Group of Genomics and Postgenomic Technologies of Central Research Institute of Epidemiology	Samoilov A.E. et al
	Russia/MOS/CRIE/L189D0866u_9472/2021	EPI_ISL_7688387	2021-11-07	Molecular diagnostic laboratory of Federal Budget Institution of Science "Central Research Institute of Epidemiology" of The Federal Service on Customers' Rights Protection and Human Well/being Surveillance	Group of Genomics and Postgenomic Technologies of Central Research Institute of Epidemiology	Samoilov A.E. et al
	Russia/SPE/RII/MH18491S/2021	EPI_ISL_2523605	2021-05-24	WHO National Influenza Centre Russian Federation	WHO National Influenza Centre Russian Federation	Andrey Komissarov et al
	Russia/SPE/RII/MH18492S/2021	EPI_ISL_2523608	2021-05-12	HELIX LLC	WHO National Influenza Centre Russian Federation	Andrey Komissarov et al
	Russia/SPE/RII/MH18497S/2021	EPI_ISL_2523611	2021-05-16	HELIX LLC	WHO National Influenza Centre Russian Federation	Andrey Komissarov et al
	Russia/MOS/CRIE/L189D1389u_6092/2021	EPI_ISL_7688369	2021-11-07	Molecular diagnostic laboratory of Federal Budget Institution of Science "Central Research Institute of Epidemiology" of The Federal Service on Customers' Rights Protection and Human Well/being Surveillance	Group of Genomics and Postgenomic Technologies of Central Research Institute of Epidemiology	Samoilov A.E. et al
	Russia/SPE/RII/MH18501S/2021	EPI_ISL_2523617	2021-05-22	HELIX LLC	WHO National Influenza Centre Russian Federation	Andrey Komissarov et al
	Russia/MOS/CRIE/L189D1442u_3233/2021	EPI_ISL_7688370	2021-11-07	Molecular diagnostic laboratory of Federal Budget Institution of Science "Central Research Institute of Epidemiology" of The Federal Service on Customers' Rights Protection and Human Well/being Surveillance	Group of Genomics and Postgenomic Technologies of Central Research Institute of Epidemiology	Samoilov A.E. et al
	Russia/SPE/RII/MH18509S/2021	EPI_ISL_2523623	2021-05-16	HELIX LLC	WHO National Influenza Centre Russian Federation	Andrey Komissarov et al
	Russia/MOS/CRIE/L189D1491u_3278/2021	EPI_ISL_7688371	2021-11-07	Molecular diagnostic laboratory of Federal Budget Institution of Science "Central Research Institute of Epidemiology" of The Federal Service on Customers' Rights Protection and Human Well/being Surveillance	Group of Genomics and Postgenomic Technologies of Central Research Institute of Epidemiology	Samoilov A.E. et al
	Russia/SPE/RII/MH18539S/2021	EPI_ISL_2523629	2021-05-13	HELIX LLC	WHO National Influenza Centre Russian Federation	Andrey Komissarov et al
	Russia/VOR/RII/MH25706S/2021	EPI_ISL_3122903	2021-06-10	Voronezh Regional Clinical Consultative and Diagnostic Center	WHO National Influenza Centre Russian Federation	Andrey Komissarov et al
	Russia/MOS/CRIE/L189D1494u_6012/2021	EPI_ISL_7688372	2021-11-07	Molecular diagnostic laboratory of Federal Budget Institution of Science "Central Research Institute of Epidemiology" of The Federal Service on Customers' Rights Protection and Human Well/being Surveillance	Group of Genomics and Postgenomic Technologies of Central Research Institute of Epidemiology	Samoilov A.E. et al
	Russia/SPE/RII/MH18548S/2021	EPI_ISL_2523636	2021-05-12	HELIX LLC	WHO National Influenza Centre Russian Federation	Andrey Komissarov et al
	Russia/MOS/CRIE/L189D1519u_1915/2021	EPI_ISL_7688373	2021-11-07	Molecular diagnostic laboratory of Federal Budget Institution of Science "Central Research Institute of Epidemiology" of The Federal Service on Customers' Rights Protection and Human Well/being Surveillance	Group of Genomics and Postgenomic Technologies of Central Research Institute of Epidemiology	Samoilov A.E. et al
	Russia/MOS/CRIE/L189D1550u_2376/2021	EPI_ISL_7688374	2021-11-07	Molecular diagnostic laboratory of Federal Budget Institution of Science "Central Research Institute of Epidemiology" of The Federal Service on Customers' Rights Protection and Human Well/being Surveillance	Group of Genomics and Postgenomic Technologies of Central Research Institute of Epidemiology	Samoilov A.E. et al
	Russia/MOW/RII/MH25162S/2021	EPI_ISL_2964528	2021-06-11	N.F. Gamaleya Research Center for Epidemiology and Microbiology	WHO National Influenza Centre Russian Federation	Andrey Komissarov et al
	Russia/IVA/RII/MH28038S/2021	EPI_ISL_3122977	2021-06-12	City Clinical Hospital No 1	WHO National Influenza Centre Russian Federation	Andrey Komissarov et al
	Russia/SPE/RII/MH18566S/2021	EPI_ISL_2523651	2021-05-16	HELIX LLC	WHO National Influenza Centre Russian Federation	Andrey Komissarov et al
	Russia/SPE/RII/MH18567S/2021	EPI_ISL_2523654	2021-05-12	HELIX LLC	WHO National Influenza Centre Russian Federation	Andrey Komissarov et al
	Russia/SPE/RII/MH18572S/2021	EPI_ISL_2523657	2021-05-11	HELIX LLC	WHO National Influenza Centre Russian Federation	Andrey Komissarov et al
	Russia/MOW/RII/MH22354S/2021	EPI_ISL_2816294	2021-06-12	N.F. Gamaleya Research Center for Epidemiology and Microbiology	WHO National Influenza Centre Russian Federation	Andrey Komissarov et al
	Russia/MOS/CRIE/L189D1551u_4894/2021	EPI_ISL_7688375	2021-11-07	Molecular diagnostic laboratory of Federal Budget Institution of Science "Central Research Institute of Epidemiology" of The Federal Service on Customers' Rights Protection and Human Well/being Surveillance	Group of Genomics and Postgenomic Technologies of Central Research Institute of Epidemiology	Samoilov A.E. et al
	Russia/MOW/RII/MH24826S/2021	EPI_ISL_2899803	2021-06-12	N.F. Gamaleya Research Center for Epidemiology and Microbiology	WHO National Influenza Centre Russian Federation	Andrey Komissarov et al
	Russia/MOS/CRIE/L189D1555u_6213/2021	EPI_ISL_7688376	2021-11-07	Molecular diagnostic laboratory of Federal Budget Institution of Science "Central Research Institute of Epidemiology" of The Federal Service on Customers' Rights Protection and Human Well/being Surveillance	Group of Genomics and Postgenomic Technologies of Central Research Institute of Epidemiology	Samoilov A.E. et al
	Russia/SPE/RII/MH18581S/2021	EPI_ISL_2450607	2021-05-15	HELIX LLC	WHO National Influenza Centre Russian Federation	Andrey Komissarov et al
	Russia/SPE/RII/MH18592S/2021	EPI_ISL_2523667	2021-05-25	WHO National Influenza Centre Russian Federation	WHO National Influenza Centre Russian Federation	Andrey Komissarov et al
	Russia/MOS/CRIE/L189D1560u_6234/2021	EPI_ISL_7688377	2021-11-07	Molecular diagnostic laboratory of Federal Budget Institution of Science "Central Research Institute of Epidemiology" of The Federal Service on Customers' Rights Protection and Human Well/being Surveillance	Group of Genomics and Postgenomic Technologies of Central Research Institute of Epidemiology	Samoilov A.E. et al
	Russia/MOS/CRIE/L189D1564_3655/2021	EPI_ISL_7688378	2021-11-07	Molecular diagnostic laboratory of Federal Budget Institution of Science "Central Research Institute of Epidemiology" of The Federal Service on Customers' Rights Protection and Human Well/being Surveillance	Group of Genomics and Postgenomic Technologies of Central Research Institute of Epidemiology	Samoilov A.E. et al
	Russia/MOS/CRIE/L189D1634u_0337/2021	EPI_ISL_7688379	2021-11-07	Molecular diagnostic laboratory of Federal Budget Institution of Science "Central Research Institute of Epidemiology" of The Federal Service on Customers' Rights Protection and Human Well/being Surveillance	Group of Genomics and Postgenomic Technologies of Central Research Institute of Epidemiology	Samoilov A.E. et al
	Russia/MOS/CRIE/L189D1711u_6334/2021	EPI_ISL_7688380	2021-11-07	Molecular diagnostic laboratory of Federal Budget Institution of Science "Central Research Institute of Epidemiology" of The Federal Service on Customers' Rights Protection and Human Well/being Surveillance	Group of Genomics and Postgenomic Technologies of Central Research Institute of Epidemiology	Samoilov A.E. et al
	Russia/MOS/CRIE/L189D1891u_2356/2021	EPI_ISL_7688381	2021-11-07	Molecular diagnostic laboratory of Federal Budget Institution of Science "Central Research Institute of Epidemiology" of The Federal Service on Customers' Rights Protection and Human Well/being Surveillance	Group of Genomics and Postgenomic Technologies of Central Research Institute of Epidemiology	Samoilov A.E. et al
	Russia/MOS/CRIE/L189D1920u_0636/2021	EPI_ISL_7688382	2021-11-07	Molecular diagnostic laboratory of Federal Budget Institution of Science "Central Research Institute of Epidemiology" of The Federal Service on Customers' Rights Protection and Human Well/being Surveillance	Group of Genomics and Postgenomic Technologies of Central Research Institute of Epidemiology	Samoilov A.E. et al
	Russia/MOS/CRIE/L189D2118u_8614/2021	EPI_ISL_7688383	2021-11-07	Molecular diagnostic laboratory of Federal Budget Institution of Science "Central Research Institute of Epidemiology" of The Federal Service on Customers' Rights Protection and Human Well/being Surveillance	Group of Genomics and Postgenomic Technologies of Central Research Institute of Epidemiology	Samoilov A.E. et al
	Russia/MOS/CRIE/L189D2389u_3371/2021	EPI_ISL_7688384	2021-11-07	Molecular diagnostic laboratory of Federal Budget Institution of Science "Central Research Institute of Epidemiology" of The Federal Service on Customers' Rights Protection and Human Well/being Surveillance	Group of Genomics and Postgenomic Technologies of Central Research Institute of Epidemiology	Samoilov A.E. et al
	Russia/MOS/CRIE/L189D2613u_3035/2021	EPI_ISL_7688385	2021-11-07	Molecular diagnostic laboratory of Federal Budget Institution of Science "Central Research Institute of Epidemiology" of The Federal Service on Customers' Rights Protection and Human Well/being Surveillance	Group of Genomics and Postgenomic Technologies of Central Research Institute of Epidemiology	Samoilov A.E. et al
	Russia/MOS/CRIE/L191D0417u_7256/2021	EPI_ISL_7688420	2021-11-07	Molecular diagnostic laboratory of Federal Budget Institution of Science "Central Research Institute of Epidemiology" of The Federal Service on Customers' Rights Protection and Human Well/being Surveillance	Group of Genomics and Postgenomic Technologies of Central Research Institute of Epidemiology	Samoilov A.E. et al
	Russia/SPE/RII/MH18623S/2021	EPI_ISL_2523696	2021-05-27	WHO National Influenza Centre Russian Federation	WHO National Influenza Centre Russian Federation	Andrey Komissarov et al
	Russia/MOS/CRIE/L191D0441u_1333/2021	EPI_ISL_7688421	2021-11-07	Molecular diagnostic laboratory of Federal Budget Institution of Science "Central Research Institute of Epidemiology" of The Federal Service on Customers' Rights Protection and Human Well/being Surveillance	Group of Genomics and Postgenomic Technologies of Central Research Institute of Epidemiology	Samoilov A.E. et al
	Russia/MOS/CRIE/L191D0489u_8756/2021	EPI_ISL_7688404	2021-11-07	Molecular diagnostic laboratory of Federal Budget Institution of Science "Central Research Institute of Epidemiology" of The Federal Service on Customers' Rights Protection and Human Well/being Surveillance	Group of Genomics and Postgenomic Technologies of Central Research Institute of Epidemiology	Samoilov A.E. et al
	Russia/SPE/RII/MH18631S/2021	EPI_ISL_2523705	2021-05-27	WHO National Influenza Centre Russian Federation	WHO National Influenza Centre Russian Federation	Andrey Komissarov et al
	Russia/MOS/CRIE/L191D0523u_4735/2021	EPI_ISL_7688405	2021-11-07	Molecular diagnostic laboratory of Federal Budget Institution of Science "Central Research Institute of Epidemiology" of The Federal Service on Customers' Rights Protection and Human Well/being Surveillance	Group of Genomics and Postgenomic Technologies of Central Research Institute of Epidemiology	Samoilov A.E. et al
	Russia/MOS/CRIE/L191D0580u_7293/2021	EPI_ISL_7688406	2021-11-07	Molecular diagnostic laboratory of Federal Budget Institution of Science "Central Research Institute of Epidemiology" of The Federal Service on Customers' Rights Protection and Human Well/being Surveillance	Group of Genomics and Postgenomic Technologies of Central Research Institute of Epidemiology	Samoilov A.E. et al
	Russia/MOS/CRIE/L191D0844u_0096/2021	EPI_ISL_7688407	2021-11-07	Molecular diagnostic laboratory of Federal Budget Institution of Science "Central Research Institute of Epidemiology" of The Federal Service on Customers' Rights Protection and Human Well/being Surveillance	Group of Genomics and Postgenomic Technologies of Central Research Institute of Epidemiology	Samoilov A.E. et al
	Russia/MOS/CRIE/L192D0009u_7679/2021	EPI_ISL_7688423	2021-11-07	Molecular diagnostic laboratory of Federal Budget Institution of Science "Central Research Institute of Epidemiology" of The Federal Service on Customers' Rights Protection and Human Well/being Surveillance	Group of Genomics and Postgenomic Technologies of Central Research Institute of Epidemiology	Samoilov A.E. et al
	Russia/SPE/RII/MH18641S/2021	EPI_ISL_2523721	2021-05-27	WHO National Influenza Centre Russian Federation	WHO National Influenza Centre Russian Federation	Andrey Komissarov et al
	Russia/MOS/CRIE/L192D0149u_7156/2021	EPI_ISL_7688417	2021-11-07	Molecular diagnostic laboratory of Federal Budget Institution of Science "Central Research Institute of Epidemiology" of The Federal Service on Customers' Rights Protection and Human Well/being Surveillance	Group of Genomics and Postgenomic Technologies of Central Research Institute of Epidemiology	Samoilov A.E. et al
	Russia/MOW/CRIE/L188D0127u_1779/2021	EPI_ISL_7688534	2021-11-07	Molecular diagnostic laboratory of Federal Budget Institution of Science "Central Research Institute of Epidemiology" of The Federal Service on Customers' Rights Protection and Human Well/being Surveillance	Group of Genomics and Postgenomic Technologies of Central Research Institute of Epidemiology	Samoilov A.E. et al
	Russia/MOW/CRIE/L189D0741u_1354/2021	EPI_ISL_7688504	2021-11-07	Molecular diagnostic laboratory of Federal Budget Institution of Science "Central Research Institute of Epidemiology" of The Federal Service on Customers' Rights Protection and Human Well/being Surveillance	Group of Genomics and Postgenomic Technologies of Central Research Institute of Epidemiology	Samoilov A.E. et al
	Russia/MOW/CRIE/L189D0798u_4278/2021	EPI_ISL_7688505	2021-11-07	Molecular diagnostic laboratory of Federal Budget Institution of Science "Central Research Institute of Epidemiology" of The Federal Service on Customers' Rights Protection and Human Well/being Surveillance	Group of Genomics and Postgenomic Technologies of Central Research Institute of Epidemiology	Samoilov A.E. et al
	Russia/MOW/CRIE/L189D0901u_1331/2021	EPI_ISL_7688506	2021-11-07	Molecular diagnostic laboratory of Federal Budget Institution of Science "Central Research Institute of Epidemiology" of The Federal Service on Customers' Rights Protection and Human Well/being Surveillance	Group of Genomics and Postgenomic Technologies of Central Research Institute of Epidemiology	Samoilov A.E. et al
	Russia/SPE/RII/MH18652S/2021	EPI_ISL_2523736	2021-05-28	WHO National Influenza Centre Russian Federation	WHO National Influenza Centre Russian Federation	Andrey Komissarov et al
	Russia/MOW/CRIE/L189D1149u_6496/2021	EPI_ISL_7688497	2021-11-07	Molecular diagnostic laboratory of Federal Budget Institution of Science "Central Research Institute of Epidemiology" of The Federal Service on Customers' Rights Protection and Human Well/being Surveillance	Group of Genomics and Postgenomic Technologies of Central Research Institute of Epidemiology	Samoilov A.E. et al
	Russia/MOW/CRIE/L189D1531u_1670/2021	EPI_ISL_7688498	2021-11-07	Molecular diagnostic laboratory of Federal Budget Institution of Science "Central Research Institute of Epidemiology" of The Federal Service on Customers' Rights Protection and Human Well/being Surveillance	Group of Genomics and Postgenomic Technologies of Central Research Institute of Epidemiology	Samoilov A.E. et al
	Russia/MOW/CRIE/L189D1739u_4292/2021	EPI_ISL_7688499	2021-11-07	Molecular diagnostic laboratory of Federal Budget Institution of Science "Central Research Institute of Epidemiology" of The Federal Service on Customers' Rights Protection and Human Well/being Surveillance	Group of Genomics and Postgenomic Technologies of Central Research Institute of Epidemiology	Samoilov A.E. et al
	Russia/MOW/CRIE/L189D1937u_2550/2021	EPI_ISL_7688500	2021-11-07	Molecular diagnostic laboratory of Federal Budget Institution of Science "Central Research Institute of Epidemiology" of The Federal Service on Customers' Rights Protection and Human Well/being Surveillance	Group of Genomics and Postgenomic Technologies of Central Research Institute of Epidemiology	Samoilov A.E. et al
	Russia/MOW/RII/MH25054S/2021	EPI_ISL_2964447	2021-06-12	N.F. Gamaleya Research Center for Epidemiology and Microbiology	WHO National Influenza Centre Russian Federation	Andrey Komissarov et al
	Russia/MOW/CRIE/L189D2315u_0759/2021	EPI_ISL_7688501	2021-11-07	Molecular diagnostic laboratory of Federal Budget Institution of Science "Central Research Institute of Epidemiology" of The Federal Service on Customers' Rights Protection and Human Well/being Surveillance	Group of Genomics and Postgenomic Technologies of Central Research Institute of Epidemiology	Samoilov A.E. et al
	Russia/SPE/RII/MH18662S/2021	EPI_ISL_2523759	2021-05-28	WHO National Influenza Centre Russian Federation	WHO National Influenza Centre Russian Federation	Andrey Komissarov et al
	Russia/MOW/CRIE/L189D2538_8033/2021	EPI_ISL_7688502	2021-11-07	Molecular diagnostic laboratory of Federal Budget Institution of Science "Central Research Institute of Epidemiology" of The Federal Service on Customers' Rights Protection and Human Well/being Surveillance	Group of Genomics and Postgenomic Technologies of Central Research Institute of Epidemiology	Samoilov A.E. et al
	Russia/MOW/CRIE/L189D2615u_5357/2021	EPI_ISL_7688503	2021-11-07	Molecular diagnostic laboratory of Federal Budget Institution of Science "Central Research Institute of Epidemiology" of The Federal Service on Customers' Rights Protection and Human Well/being Surveillance	Group of Genomics and Postgenomic Technologies of Central Research Institute of Epidemiology	Samoilov A.E. et al
	Russia/MOW/CRIE/L189D3152u_0899/2021	EPI_ISL_7717362	2021-11-07	Molecular diagnostic laboratory of Federal Budget Institution of Science "Central Research Institute of Epidemiology" of The Federal Service on Customers' Rights Protection and Human Well/being Surveillance	Group of Genomics and Postgenomic Technologies of Central Research Institute of Epidemiology	Samoilov A.E. et al
	Russia/SPE/RII/MH18671S/2021	EPI_ISL_2523771	2021-05-29	WHO National Influenza Centre Russian Federation	WHO National Influenza Centre Russian Federation	Andrey Komissarov et al
	Russia/MOW/CRIE/L191D0454u_9477/2021	EPI_ISL_7688515	2021-11-07	Molecular diagnostic laboratory of Federal Budget Institution of Science "Central Research Institute of Epidemiology" of The Federal Service on Customers' Rights Protection and Human Well/being Surveillance	Group of Genomics and Postgenomic Technologies of Central Research Institute of Epidemiology	Samoilov A.E. et al
	Russia/MOW/CRIE/L191D0567u_2910/2021	EPI_ISL_7688516	2021-11-07	Molecular diagnostic laboratory of Federal Budget Institution of Science "Central Research Institute of Epidemiology" of The Federal Service on Customers' Rights Protection and Human Well/being Surveillance	Group of Genomics and Postgenomic Technologies of Central Research Institute of Epidemiology	Samoilov A.E. et al
	Russia/MOW/CRIE/L191D1122u_7732/2021	EPI_ISL_7688514	2021-11-07	Molecular diagnostic laboratory of Federal Budget Institution of Science "Central Research Institute of Epidemiology" of The Federal Service on Customers' Rights Protection and Human Well/being Surveillance	Group of Genomics and Postgenomic Technologies of Central Research Institute of Epidemiology	Samoilov A.E. et al
	Russia/MOW/CRIE/L192D0099u_7537/2021	EPI_ISL_7688537	2021-11-07	Molecular diagnostic laboratory of Federal Budget Institution of Science "Central Research Institute of Epidemiology" of The Federal Service on Customers' Rights Protection and Human Well/being Surveillance	Group of Genomics and Postgenomic Technologies of Central Research Institute of Epidemiology	Samoilov A.E. et al
	Russia/MOW/CRIE/L192D0133u_3336/2021	EPI_ISL_7688527	2021-11-07	Molecular diagnostic laboratory of Federal Budget Institution of Science "Central Research Institute of Epidemiology" of The Federal Service on Customers' Rights Protection and Human Well/being Surveillance	Group of Genomics and Postgenomic Technologies of Central Research Institute of Epidemiology	Samoilov A.E. et al
	Russia/MOW/CRIE/L221D0015u_8115/2021	EPI_ISL_7717492	2021-11-07	Molecular diagnostic laboratory of Federal Budget Institution of Science "Central Research Institute of Epidemiology" of The Federal Service on Customers' Rights Protection and Human Well/being Surveillance	Group of Genomics and Postgenomic Technologies of Central Research Institute of Epidemiology	Samoilov A.E. et al
	Russia/SPE/RII/MH18684S/2021	EPI_ISL_2523793	2021-05-30	WHO National Influenza Centre Russian Federation	WHO National Influenza Centre Russian Federation	Andrey Komissarov et al
	Russia/OMS/CRIE/L189D0153u_1234/2021	EPI_ISL_7688335	2021-11-07	Molecular diagnostic laboratory of Federal Budget Institution of Science "Central Research Institute of Epidemiology" of The Federal Service on Customers' Rights Protection and Human Well/being Surveillance	Group of Genomics and Postgenomic Technologies of Central Research Institute of Epidemiology	Samoilov A.E. et al
	Russia/ORL/CRIE/L189D2973u_4774/2021	EPI_ISL_7717360	2021-11-07	Molecular diagnostic laboratory of Federal Budget Institution of Science "Central Research Institute of Epidemiology" of The Federal Service on Customers' Rights Protection and Human Well/being Surveillance	Group of Genomics and Postgenomic Technologies of Central Research Institute of Epidemiology	Samoilov A.E. et al
	Russia/RYA/CRIE/L189D1940u_1538/2021	EPI_ISL_7688322	2021-11-07	Molecular diagnostic laboratory of Federal Budget Institution of Science "Central Research Institute of Epidemiology" of The Federal Service on Customers' Rights Protection and Human Well/being Surveillance	Group of Genomics and Postgenomic Technologies of Central Research Institute of Epidemiology	Samoilov A.E. et al
	Russia/RYA/CRIE/L189D2298u_1931/2021	EPI_ISL_7688324	2021-11-07	Molecular diagnostic laboratory of Federal Budget Institution of Science "Central Research Institute of Epidemiology" of The Federal Service on Customers' Rights Protection and Human Well/being Surveillance	Group of Genomics and Postgenomic Technologies of Central Research Institute of Epidemiology	Samoilov A.E. et al
	Russia/RYA/CRIE/L189D2302u_4233/2021	EPI_ISL_7688325	2021-11-07	Molecular diagnostic laboratory of Federal Budget Institution of Science "Central Research Institute of Epidemiology" of The Federal Service on Customers' Rights Protection and Human Well/being Surveillance	Group of Genomics and Postgenomic Technologies of Central Research Institute of Epidemiology	Samoilov A.E. et al
	Russia/RYA/CRIE/L189D2303u_7814/2021	EPI_ISL_7688326	2021-11-07	Molecular diagnostic laboratory of Federal Budget Institution of Science "Central Research Institute of Epidemiology" of The Federal Service on Customers' Rights Protection and Human Well/being Surveillance	Group of Genomics and Postgenomic Technologies of Central Research Institute of Epidemiology	Samoilov A.E. et al
	Russia/SMO/CRIE/L219S0145u/2021	EPI_ISL_3919603	2021-06-13	Molecular diagnostic laboratory of Federal Budget Institution of Science "Central Research Institute of Epidemiology" of The Federal Service on Customers' Rights Protection and Human Well/being Surveillance	Group of Genomics and Postgenomic Technologies of Central Research Institute of Epidemiology	Samoilov A.E. et al
	Russia/KAM/RII/MH30009S/2021	EPI_ISL_3123016	2021-06-15	Petropavlosk/Kamchatsky City Polyclinic No 3	WHO National Influenza Centre Russian Federation	Andrey Komissarov et al
	Russia/RYA/CRIE/L219F0050u_8079/2021	EPI_ISL_7717106	2021-11-07	Molecular diagnostic laboratory of Federal Budget Institution of Science "Central Research Institute of Epidemiology" of The Federal Service on Customers' Rights Protection and Human Well/being Surveillance	Group of Genomics and Postgenomic Technologies of Central Research Institute of Epidemiology	Samoilov A.E. et al
	Russia/SPE/RII/2611S/2021	EPI_ISL_7591221	2021-11-07	WHO National Influenza Centre Russian Federation	WHO National Influenza Centre Russian Federation	Andrey Komissarov et al
	Russia/MOW_FPI/8582/2021	EPI_ISL_9123625	2021-06-15	National Medical Research Center of Phthisiopulmonology and Infectious Diseases	National Medical Research Center of Phthisiopulmonology and Infectious Diseases	Denis Lagutkin et al
	Russia/SPE/RII/2614S/2021	EPI_ISL_7591222	2021-11-07	WHO National Influenza Centre Russian Federation	WHO National Influenza Centre Russian Federation	Andrey Komissarov et al
	Russia/SPE/RII/MH38325S/2021	EPI_ISL_6831923	2021-11-07	HELIX LLC	WHO National Influenza Centre Russian Federation	Andrey Komissarov et al
	Russia/SPE/RII/MH38332S/2021	EPI_ISL_6831925	2021-11-07	HELIX LLC	WHO National Influenza Centre Russian Federation	Andrey Komissarov et al
	Russia/SPE/RII/MH38334S/2021	EPI_ISL_6831926	2021-11-07	HELIX LLC	WHO National Influenza Centre Russian Federation	Andrey Komissarov et al
	Russia/SAR/RII/MH25580S/2021	EPI_ISL_3122897	2021-06-15	Perinatal Center	WHO National Influenza Centre Russian Federation	Andrey Komissarov et al
	Russia/SPE/RII/MH38338S/2021	EPI_ISL_6831928	2021-11-07	HELIX LLC	WHO National Influenza Centre Russian Federation	Andrey Komissarov et al
	Russia/SPE/RII/MH38342S/2021	EPI_ISL_6831929	2021-11-07	HELIX LLC	WHO National Influenza Centre Russian Federation	Andrey Komissarov et al
	Russia/SPE/RII/MH38345S/2021	EPI_ISL_6831930	2021-11-07	HELIX LLC	WHO National Influenza Centre Russian Federation	Andrey Komissarov et al
	Russia/SPE/RII/MH38347S/2021	EPI_ISL_6831931	2021-11-07	HELIX LLC	WHO National Influenza Centre Russian Federation	Andrey Komissarov et al
	Russia/SPE/RII/MH38353S/2021	EPI_ISL_6831932	2021-11-07	HELIX LLC	WHO National Influenza Centre Russian Federation	Andrey Komissarov et al
	Russia/TUL/CRIE/L191D1174u_5175/2021	EPI_ISL_7688311	2021-11-07	Molecular diagnostic laboratory of Federal Budget Institution of Science "Central Research Institute of Epidemiology" of The Federal Service on Customers' Rights Protection and Human Well/being Surveillance	Group of Genomics and Postgenomic Technologies of Central Research Institute of Epidemiology	Samoilov A.E. et al
	Russia/TUL/CRIE/L191D1178u_2859/2021	EPI_ISL_7688312	2021-11-07	Molecular diagnostic laboratory of Federal Budget Institution of Science "Central Research Institute of Epidemiology" of The Federal Service on Customers' Rights Protection and Human Well/being Surveillance	Group of Genomics and Postgenomic Technologies of Central Research Institute of Epidemiology	Samoilov A.E. et al
	Russia/VLA/CRIE/L191D1204u_6690/2021	EPI_ISL_7688301	2021-11-07	Molecular diagnostic laboratory of Federal Budget Institution of Science "Central Research Institute of Epidemiology" of The Federal Service on Customers' Rights Protection and Human Well/being Surveillance	Group of Genomics and Postgenomic Technologies of Central Research Institute of Epidemiology	Samoilov A.E. et al
	Russia/YAR/CRIE/L191D1200u_2897/2021	EPI_ISL_7688291	2021-11-07	Molecular diagnostic laboratory of Federal Budget Institution of Science "Central Research Institute of Epidemiology" of The Federal Service on Customers' Rights Protection and Human Well/being Surveillance	Group of Genomics and Postgenomic Technologies of Central Research Institute of Epidemiology	Samoilov A.E. et al
	Russia/ARK/CRIE/L189E0139u_5279/2021	EPI_ISL_7717390	2021-11-08	Molecular diagnostic laboratory of Federal Budget Institution of Science "Central Research Institute of Epidemiology" of The Federal Service on Customers' Rights Protection and Human Well/being Surveillance	Group of Genomics and Postgenomic Technologies of Central Research Institute of Epidemiology	Samoilov A.E. et al
	Russia/AST/RII/MH38934S/2021	EPI_ISL_6831961	2021-11-08	Aleksandro/Mariinsky Regional Clinical Hospital	WHO National Influenza Centre Russian Federation	Andrey Komissarov et al
	Russia/AST/RII/MH38935S/2021	EPI_ISL_6831962	2021-11-08	Aleksandro/Mariinsky Regional Clinical Hospital	WHO National Influenza Centre Russian Federation	Andrey Komissarov et al
	Russia/KDA/RII/MH23599S/2021	EPI_ISL_2964415	2021-06-16	Krai Clinical Hospital No 2	WHO National Influenza Centre Russian Federation	Andrey Komissarov et al
	Russia/AST/RII/MH38937S/2021	EPI_ISL_6831963	2021-11-08	Aleksandro/Mariinsky Regional Clinical Hospital	WHO National Influenza Centre Russian Federation	Andrey Komissarov et al
	Russia/AST/RII/MH38941S/2021	EPI_ISL_6831964	2021-11-08	Aleksandro/Mariinsky Regional Clinical Hospital	WHO National Influenza Centre Russian Federation	Andrey Komissarov et al
	Russia/AST/RII/MH38942S/2021	EPI_ISL_6831965	2021-11-08	Aleksandro/Mariinsky Regional Clinical Hospital	WHO National Influenza Centre Russian Federation	Andrey Komissarov et al
	Russia/AST/RII/MH38946S/2021	EPI_ISL_6831966	2021-11-08	Aleksandro/Mariinsky Regional Clinical Hospital	WHO National Influenza Centre Russian Federation	Andrey Komissarov et al
	Russia/AST/RII/MH38947S/2021	EPI_ISL_6831967	2021-11-08	Aleksandro/Mariinsky Regional Clinical Hospital	WHO National Influenza Centre Russian Federation	Andrey Komissarov et al
	Russia/AST/RII/MH38948S/2021	EPI_ISL_6831968	2021-11-08	Aleksandro/Mariinsky Regional Clinical Hospital	WHO National Influenza Centre Russian Federation	Andrey Komissarov et al
	Russia/SPE/RII/MH19429S/2021	EPI_ISL_2899774	2021-05-29	HELIX LLC	WHO National Influenza Centre Russian Federation	Andrey Komissarov et al
	Russia/AST/RII/MH38949S/2021	EPI_ISL_6831969	2021-11-08	Aleksandro/Mariinsky Regional Clinical Hospital	WHO National Influenza Centre Russian Federation	Andrey Komissarov et al
	Russia/SPE/RII/MH19431S/2021	EPI_ISL_2899776	2021-05-29	HELIX LLC	WHO National Influenza Centre Russian Federation	Andrey Komissarov et al
	Russia/AST/RII/MH38953S/2021	EPI_ISL_6831970	2021-11-08	Aleksandro/Mariinsky Regional Clinical Hospital	WHO National Influenza Centre Russian Federation	Andrey Komissarov et al
	Russia/BRY/CRIE/L189E0025u_1955/2021	EPI_ISL_7717637	2021-11-08	Molecular diagnostic laboratory of Federal Budget Institution of Science "Central Research Institute of Epidemiology" of The Federal Service on Customers' Rights Protection and Human Well/being Surveillance	Group of Genomics and Postgenomic Technologies of Central Research Institute of Epidemiology	Samoilov A.E. et al
	Russia/KB/CRIE/L189E0348u_3931/2021	EPI_ISL_7717412	2021-11-08	Molecular diagnostic laboratory of Federal Budget Institution of Science "Central Research Institute of Epidemiology" of The Federal Service on Customers' Rights Protection and Human Well/being Surveillance	Group of Genomics and Postgenomic Technologies of Central Research Institute of Epidemiology	Samoilov A.E. et al
	Russia/KB/CRIE/L189E0357u_5334/2021	EPI_ISL_7717415	2021-11-08	Molecular diagnostic laboratory of Federal Budget Institution of Science "Central Research Institute of Epidemiology" of The Federal Service on Customers' Rights Protection and Human Well/being Surveillance	Group of Genomics and Postgenomic Technologies of Central Research Institute of Epidemiology	Samoilov A.E. et al
	Russia/KB/CRIE/L189E0360u_0495/2021	EPI_ISL_7717417	2021-11-08	Molecular diagnostic laboratory of Federal Budget Institution of Science "Central Research Institute of Epidemiology" of The Federal Service on Customers' Rights Protection and Human Well/being Surveillance	Group of Genomics and Postgenomic Technologies of Central Research Institute of Epidemiology	Samoilov A.E. et al
	Russia/KB/CRIE/L189E0372u_8893/2021	EPI_ISL_7717419	2021-11-08	Molecular diagnostic laboratory of Federal Budget Institution of Science "Central Research Institute of Epidemiology" of The Federal Service on Customers' Rights Protection and Human Well/being Surveillance	Group of Genomics and Postgenomic Technologies of Central Research Institute of Epidemiology	Samoilov A.E. et al
	Russia/KB/CRIE/L189E0378_1293/2021	EPI_ISL_7717421	2021-11-08	Molecular diagnostic laboratory of Federal Budget Institution of Science "Central Research Institute of Epidemiology" of The Federal Service on Customers' Rights Protection and Human Well/being Surveillance	Group of Genomics and Postgenomic Technologies of Central Research Institute of Epidemiology	Samoilov A.E. et al
	Russia/KB/CRIE/L191E0091_1372/2021	EPI_ISL_7717470	2021-11-08	Molecular diagnostic laboratory of Federal Budget Institution of Science "Central Research Institute of Epidemiology" of The Federal Service on Customers' Rights Protection and Human Well/being Surveillance	Group of Genomics and Postgenomic Technologies of Central Research Institute of Epidemiology	Samoilov A.E. et al
	Russia/KOS/CRIE/L219F0024u_7535/2021	EPI_ISL_7717088	2021-11-08	Molecular diagnostic laboratory of Federal Budget Institution of Science "Central Research Institute of Epidemiology" of The Federal Service on Customers' Rights Protection and Human Well/being Surveillance	Group of Genomics and Postgenomic Technologies of Central Research Institute of Epidemiology	Samoilov A.E. et al
	Russia/MAG/CRIE/L219L0035u_6137/2021	EPI_ISL_7688560	2021-11-08	Molecular diagnostic laboratory of Federal Budget Institution of Science "Central Research Institute of Epidemiology" of The Federal Service on Customers' Rights Protection and Human Well/being Surveillance	Group of Genomics and Postgenomic Technologies of Central Research Institute of Epidemiology	Samoilov A.E. et al
	Russia/MAG/CRIE/L219L0037u_6214/2021	EPI_ISL_7688562	2021-11-08	Molecular diagnostic laboratory of Federal Budget Institution of Science "Central Research Institute of Epidemiology" of The Federal Service on Customers' Rights Protection and Human Well/being Surveillance	Group of Genomics and Postgenomic Technologies of Central Research Institute of Epidemiology	Samoilov A.E. et al
	Russia/MAG/CRIE/L219L0038u_6090/2021	EPI_ISL_7688563	2021-11-08	Molecular diagnostic laboratory of Federal Budget Institution of Science "Central Research Institute of Epidemiology" of The Federal Service on Customers' Rights Protection and Human Well/being Surveillance	Group of Genomics and Postgenomic Technologies of Central Research Institute of Epidemiology	Samoilov A.E. et al
	Russia/MAG/CRIE/L219L0039u_6558/2021	EPI_ISL_7688564	2021-11-08	Molecular diagnostic laboratory of Federal Budget Institution of Science "Central Research Institute of Epidemiology" of The Federal Service on Customers' Rights Protection and Human Well/being Surveillance	Group of Genomics and Postgenomic Technologies of Central Research Institute of Epidemiology	Samoilov A.E. et al
	Russia/MAG/CRIE/L219L0041_6171/2021	EPI_ISL_7688565	2021-11-08	Molecular diagnostic laboratory of Federal Budget Institution of Science "Central Research Institute of Epidemiology" of The Federal Service on Customers' Rights Protection and Human Well/being Surveillance	Group of Genomics and Postgenomic Technologies of Central Research Institute of Epidemiology	Samoilov A.E. et al
	Russia/MAG/CRIE/L219L0046u_6472/2021	EPI_ISL_7688570	2021-11-08	Molecular diagnostic laboratory of Federal Budget Institution of Science "Central Research Institute of Epidemiology" of The Federal Service on Customers' Rights Protection and Human Well/being Surveillance	Group of Genomics and Postgenomic Technologies of Central Research Institute of Epidemiology	Samoilov A.E. et al
	Russia/MOS/CRIE/L106D0906u_2974/2021	EPI_ISL_7717257	2021-11-08	Molecular diagnostic laboratory of Federal Budget Institution of Science "Central Research Institute of Epidemiology" of The Federal Service on Customers' Rights Protection and Human Well/being Surveillance	Group of Genomics and Postgenomic Technologies of Central Research Institute of Epidemiology	Samoilov A.E. et al
	Russia/SPE/RII/MH2083S/2020	EPI_ISL_602411	2020-09-22	HELIX LLC	WHO National Influenza Centre Russian Federation	Andrey Komissarov et al
	Russia/MOS/CRIE/L106D1061u_2953/2021	EPI_ISL_7717246	2021-11-08	Molecular diagnostic laboratory of Federal Budget Institution of Science "Central Research Institute of Epidemiology" of The Federal Service on Customers' Rights Protection and Human Well/being Surveillance	Group of Genomics and Postgenomic Technologies of Central Research Institute of Epidemiology	Samoilov A.E. et al
	Russia/MOS/CRIE/L106D1074u_3876/2021	EPI_ISL_7717247	2021-11-08	Molecular diagnostic laboratory of Federal Budget Institution of Science "Central Research Institute of Epidemiology" of The Federal Service on Customers' Rights Protection and Human Well/being Surveillance	Group of Genomics and Postgenomic Technologies of Central Research Institute of Epidemiology	Samoilov A.E. et al
	Russia/MOS/CRIE/L106D1100u_9453/2021	EPI_ISL_7717248	2021-11-08	Molecular diagnostic laboratory of Federal Budget Institution of Science "Central Research Institute of Epidemiology" of The Federal Service on Customers' Rights Protection and Human Well/being Surveillance	Group of Genomics and Postgenomic Technologies of Central Research Institute of Epidemiology	Samoilov A.E. et al
	Russia/MOS/CRIE/L106D1106u_9424/2021	EPI_ISL_7717249	2021-11-08	Molecular diagnostic laboratory of Federal Budget Institution of Science "Central Research Institute of Epidemiology" of The Federal Service on Customers' Rights Protection and Human Well/being Surveillance	Group of Genomics and Postgenomic Technologies of Central Research Institute of Epidemiology	Samoilov A.E. et al
	Russia/MOS/CRIE/L106D1107u_8515/2021	EPI_ISL_7717250	2021-11-08	Molecular diagnostic laboratory of Federal Budget Institution of Science "Central Research Institute of Epidemiology" of The Federal Service on Customers' Rights Protection and Human Well/being Surveillance	Group of Genomics and Postgenomic Technologies of Central Research Institute of Epidemiology	Samoilov A.E. et al
	Russia/MOS/CRIE/L106D1214u_1349/2021	EPI_ISL_7717252	2021-11-08	Molecular diagnostic laboratory of Federal Budget Institution of Science "Central Research Institute of Epidemiology" of The Federal Service on Customers' Rights Protection and Human Well/being Surveillance	Group of Genomics and Postgenomic Technologies of Central Research Institute of Epidemiology	Samoilov A.E. et al
	Russia/MOS/CRIE/L106D1235u_6607/2021	EPI_ISL_7717253	2021-11-08	Molecular diagnostic laboratory of Federal Budget Institution of Science "Central Research Institute of Epidemiology" of The Federal Service on Customers' Rights Protection and Human Well/being Surveillance	Group of Genomics and Postgenomic Technologies of Central Research Institute of Epidemiology	Samoilov A.E. et al
	Russia/MOS/CRIE/L106D1252u_6431/2021	EPI_ISL_7717254	2021-11-08	Molecular diagnostic laboratory of Federal Budget Institution of Science "Central Research Institute of Epidemiology" of The Federal Service on Customers' Rights Protection and Human Well/being Surveillance	Group of Genomics and Postgenomic Technologies of Central Research Institute of Epidemiology	Samoilov A.E. et al
	Russia/MOS/CRIE/L106D1314u_6338/2021	EPI_ISL_7717255	2021-11-08	Molecular diagnostic laboratory of Federal Budget Institution of Science "Central Research Institute of Epidemiology" of The Federal Service on Customers' Rights Protection and Human Well/being Surveillance	Group of Genomics and Postgenomic Technologies of Central Research Institute of Epidemiology	Samoilov A.E. et al
	Russia/MOS/CRIE/L106E0150_1209/2021	EPI_ISL_7717270	2021-11-08	Molecular diagnostic laboratory of Federal Budget Institution of Science "Central Research Institute of Epidemiology" of The Federal Service on Customers' Rights Protection and Human Well/being Surveillance	Group of Genomics and Postgenomic Technologies of Central Research Institute of Epidemiology	Samoilov A.E. et al
	Russia/MOS/CRIE/L106E0184u_0190/2021	EPI_ISL_7717271	2021-11-08	Molecular diagnostic laboratory of Federal Budget Institution of Science "Central Research Institute of Epidemiology" of The Federal Service on Customers' Rights Protection and Human Well/being Surveillance	Group of Genomics and Postgenomic Technologies of Central Research Institute of Epidemiology	Samoilov A.E. et al
	Russia/MOS/CRIE/L106E0198u_1245/2021	EPI_ISL_7717272	2021-11-08	Molecular diagnostic laboratory of Federal Budget Institution of Science "Central Research Institute of Epidemiology" of The Federal Service on Customers' Rights Protection and Human Well/being Surveillance	Group of Genomics and Postgenomic Technologies of Central Research Institute of Epidemiology	Samoilov A.E. et al
	Russia/MOS/CRIE/L106E0253_6432/2021	EPI_ISL_7717274	2021-11-08	Molecular diagnostic laboratory of Federal Budget Institution of Science "Central Research Institute of Epidemiology" of The Federal Service on Customers' Rights Protection and Human Well/being Surveillance	Group of Genomics and Postgenomic Technologies of Central Research Institute of Epidemiology	Samoilov A.E. et al
	Russia/MOS/CRIE/L106E0257_0157/2021	EPI_ISL_7717275	2021-11-08	Molecular diagnostic laboratory of Federal Budget Institution of Science "Central Research Institute of Epidemiology" of The Federal Service on Customers' Rights Protection and Human Well/being Surveillance	Group of Genomics and Postgenomic Technologies of Central Research Institute of Epidemiology	Samoilov A.E. et al
	Russia/MOS/CRIE/L106E0263u_0135/2021	EPI_ISL_7717277	2021-11-08	Molecular diagnostic laboratory of Federal Budget Institution of Science "Central Research Institute of Epidemiology" of The Federal Service on Customers' Rights Protection and Human Well/being Surveillance	Group of Genomics and Postgenomic Technologies of Central Research Institute of Epidemiology	Samoilov A.E. et al
	Russia/MOS/CRIE/L106E0302u_7353/2021	EPI_ISL_7717278	2021-11-08	Molecular diagnostic laboratory of Federal Budget Institution of Science "Central Research Institute of Epidemiology" of The Federal Service on Customers' Rights Protection and Human Well/being Surveillance	Group of Genomics and Postgenomic Technologies of Central Research Institute of Epidemiology	Samoilov A.E. et al
	Russia/MOS/CRIE/L106E0333_9710/2021	EPI_ISL_7717279	2021-11-08	Molecular diagnostic laboratory of Federal Budget Institution of Science "Central Research Institute of Epidemiology" of The Federal Service on Customers' Rights Protection and Human Well/being Surveillance	Group of Genomics and Postgenomic Technologies of Central Research Institute of Epidemiology	Samoilov A.E. et al
	Russia/MOS/CRIE/L106E0879u_1046/2021	EPI_ISL_7717293	2021-11-08	Molecular diagnostic laboratory of Federal Budget Institution of Science "Central Research Institute of Epidemiology" of The Federal Service on Customers' Rights Protection and Human Well/being Surveillance	Group of Genomics and Postgenomic Technologies of Central Research Institute of Epidemiology	Samoilov A.E. et al
	Russia/MOS/CRIE/L106E0889u_0941/2021	EPI_ISL_7717299	2021-11-08	Molecular diagnostic laboratory of Federal Budget Institution of Science "Central Research Institute of Epidemiology" of The Federal Service on Customers' Rights Protection and Human Well/being Surveillance	Group of Genomics and Postgenomic Technologies of Central Research Institute of Epidemiology	Samoilov A.E. et al
	Russia/MOS/CRIE/L106E0899u_0871/2021	EPI_ISL_7717303	2021-11-08	Molecular diagnostic laboratory of Federal Budget Institution of Science "Central Research Institute of Epidemiology" of The Federal Service on Customers' Rights Protection and Human Well/being Surveillance	Group of Genomics and Postgenomic Technologies of Central Research Institute of Epidemiology	Samoilov A.E. et al
	Russia/MOS/CRIE/L106E0973u_1133/2021	EPI_ISL_7717319	2021-11-08	Molecular diagnostic laboratory of Federal Budget Institution of Science "Central Research Institute of Epidemiology" of The Federal Service on Customers' Rights Protection and Human Well/being Surveillance	Group of Genomics and Postgenomic Technologies of Central Research Institute of Epidemiology	Samoilov A.E. et al
	Russia/MOS/CRIE/L106E0993u_0219/2021	EPI_ISL_7717324	2021-11-08	Molecular diagnostic laboratory of Federal Budget Institution of Science "Central Research Institute of Epidemiology" of The Federal Service on Customers' Rights Protection and Human Well/being Surveillance	Group of Genomics and Postgenomic Technologies of Central Research Institute of Epidemiology	Samoilov A.E. et al
	Russia/MOS/CRIE/L106E1004u_9269/2021	EPI_ISL_7717259	2021-11-08	Molecular diagnostic laboratory of Federal Budget Institution of Science "Central Research Institute of Epidemiology" of The Federal Service on Customers' Rights Protection and Human Well/being Surveillance	Group of Genomics and Postgenomic Technologies of Central Research Institute of Epidemiology	Samoilov A.E. et al
	Russia/MOS/CRIE/L189D3234u_4858/2021	EPI_ISL_7717367	2021-11-08	Molecular diagnostic laboratory of Federal Budget Institution of Science "Central Research Institute of Epidemiology" of The Federal Service on Customers' Rights Protection and Human Well/being Surveillance	Group of Genomics and Postgenomic Technologies of Central Research Institute of Epidemiology	Samoilov A.E. et al
	Russia/MOS/CRIE/L189D3378u_6611/2021	EPI_ISL_7717369	2021-11-08	Molecular diagnostic laboratory of Federal Budget Institution of Science "Central Research Institute of Epidemiology" of The Federal Service on Customers' Rights Protection and Human Well/being Surveillance	Group of Genomics and Postgenomic Technologies of Central Research Institute of Epidemiology	Samoilov A.E. et al
	Russia/MOS/CRIE/L189D3875u_3358/2021	EPI_ISL_7717373	2021-11-08	Molecular diagnostic laboratory of Federal Budget Institution of Science "Central Research Institute of Epidemiology" of The Federal Service on Customers' Rights Protection and Human Well/being Surveillance	Group of Genomics and Postgenomic Technologies of Central Research Institute of Epidemiology	Samoilov A.E. et al
	Russia/MOS/CRIE/L189E2445u_8277/2021	EPI_ISL_7717407	2021-11-08	Molecular diagnostic laboratory of Federal Budget Institution of Science "Central Research Institute of Epidemiology" of The Federal Service on Customers' Rights Protection and Human Well/being Surveillance	Group of Genomics and Postgenomic Technologies of Central Research Institute of Epidemiology	Samoilov A.E. et al
	Russia/MOS/CRIE/L189E2452u_8876/2021	EPI_ISL_7717408	2021-11-08	Molecular diagnostic laboratory of Federal Budget Institution of Science "Central Research Institute of Epidemiology" of The Federal Service on Customers' Rights Protection and Human Well/being Surveillance	Group of Genomics and Postgenomic Technologies of Central Research Institute of Epidemiology	Samoilov A.E. et al
	Russia/MOS/CRIE/L191D1506u_9137/2021	EPI_ISL_7717442	2021-11-08	Molecular diagnostic laboratory of Federal Budget Institution of Science "Central Research Institute of Epidemiology" of The Federal Service on Customers' Rights Protection and Human Well/being Surveillance	Group of Genomics and Postgenomic Technologies of Central Research Institute of Epidemiology	Samoilov A.E. et al
	Russia/MOS/CRIE/L191D1684u_6377/2021	EPI_ISL_7717446	2021-11-08	Molecular diagnostic laboratory of Federal Budget Institution of Science "Central Research Institute of Epidemiology" of The Federal Service on Customers' Rights Protection and Human Well/being Surveillance	Group of Genomics and Postgenomic Technologies of Central Research Institute of Epidemiology	Samoilov A.E. et al
	Russia/MOS/CRIE/L191E0875_0914/2021	EPI_ISL_7717462	2021-11-08	Molecular diagnostic laboratory of Federal Budget Institution of Science "Central Research Institute of Epidemiology" of The Federal Service on Customers' Rights Protection and Human Well/being Surveillance	Group of Genomics and Postgenomic Technologies of Central Research Institute of Epidemiology	Samoilov A.E. et al
	Russia/MOS/CRIE/L192D0781u_4934/2021	EPI_ISL_7717478	2021-11-08	Molecular diagnostic laboratory of Federal Budget Institution of Science "Central Research Institute of Epidemiology" of The Federal Service on Customers' Rights Protection and Human Well/being Surveillance	Group of Genomics and Postgenomic Technologies of Central Research Institute of Epidemiology	Samoilov A.E. et al
	Russia/MOW/CRIE/L106E0127u_9005/2021	EPI_ISL_7717266	2021-11-08	Molecular diagnostic laboratory of Federal Budget Institution of Science "Central Research Institute of Epidemiology" of The Federal Service on Customers' Rights Protection and Human Well/being Surveillance	Group of Genomics and Postgenomic Technologies of Central Research Institute of Epidemiology	Samoilov A.E. et al
	Russia/MOW/CRIE/L106E0237u_3578/2021	EPI_ISL_7717273	2021-11-08	Molecular diagnostic laboratory of Federal Budget Institution of Science "Central Research Institute of Epidemiology" of The Federal Service on Customers' Rights Protection and Human Well/being Surveillance	Group of Genomics and Postgenomic Technologies of Central Research Institute of Epidemiology	Samoilov A.E. et al
	Russia/MOW/CRIE/L106E0354u_3532/2021	EPI_ISL_7717280	2021-11-08	Molecular diagnostic laboratory of Federal Budget Institution of Science "Central Research Institute of Epidemiology" of The Federal Service on Customers' Rights Protection and Human Well/being Surveillance	Group of Genomics and Postgenomic Technologies of Central Research Institute of Epidemiology	Samoilov A.E. et al
	Russia/MOW/CRIE/L106E0484u_2868/2021	EPI_ISL_7717284	2021-11-08	Molecular diagnostic laboratory of Federal Budget Institution of Science "Central Research Institute of Epidemiology" of The Federal Service on Customers' Rights Protection and Human Well/being Surveillance	Group of Genomics and Postgenomic Technologies of Central Research Institute of Epidemiology	Samoilov A.E. et al
	Russia/MOW/CRIE/L189D3171u_9099/2021	EPI_ISL_7717365	2021-11-08	Molecular diagnostic laboratory of Federal Budget Institution of Science "Central Research Institute of Epidemiology" of The Federal Service on Customers' Rights Protection and Human Well/being Surveillance	Group of Genomics and Postgenomic Technologies of Central Research Institute of Epidemiology	Samoilov A.E. et al
	Russia/MOW/CRIE/L189D3598u_4458/2021	EPI_ISL_7717371	2021-11-08	Molecular diagnostic laboratory of Federal Budget Institution of Science "Central Research Institute of Epidemiology" of The Federal Service on Customers' Rights Protection and Human Well/being Surveillance	Group of Genomics and Postgenomic Technologies of Central Research Institute of Epidemiology	Samoilov A.E. et al
	Russia/MOW/CRIE/L192D0954u_5756/2021	EPI_ISL_7717480	2021-11-08	Molecular diagnostic laboratory of Federal Budget Institution of Science "Central Research Institute of Epidemiology" of The Federal Service on Customers' Rights Protection and Human Well/being Surveillance	Group of Genomics and Postgenomic Technologies of Central Research Institute of Epidemiology	Samoilov A.E. et al
	Russia/MOW/RSMU_UWY936/2021	EPI_ISL_7952193	2021-11-08	Laboratory of clinical bacteriology, Russian Children Clinical Hospital, Pirogov Medical University, Moscow, Russian Federation	Center for Precision Genome Editing and Genetic Technologies for Biomedicine, Pirogov Medical University, Moscow, Russian Federation	Yegor Botsmanov et al
	Russia/MOW/RSMU_UYW061/2021	EPI_ISL_7952194	2021-11-08	Laboratory of clinical bacteriology, Russian Children Clinical Hospital, Pirogov Medical University, Moscow, Russian Federation	Center for Precision Genome Editing and Genetic Technologies for Biomedicine, Pirogov Medical University, Moscow, Russian Federation	Yegor Botsmanov et al
	Russia/MOW/RSMU_WUR877/2021	EPI_ISL_7952202	2021-11-08	Laboratory of clinical bacteriology, Russian Children Clinical Hospital, Pirogov Medical University, Moscow, Russian Federation	Center for Precision Genome Editing and Genetic Technologies for Biomedicine, Pirogov Medical University, Moscow, Russian Federation	Yegor Botsmanov et al
	Russia/MOW/RSMU_WZJ275/2021	EPI_ISL_7952205	2021-11-08	Laboratory of clinical bacteriology, Russian Children Clinical Hospital, Pirogov Medical University, Moscow, Russian Federation	Center for Precision Genome Editing and Genetic Technologies for Biomedicine, Pirogov Medical University, Moscow, Russian Federation	Yegor Botsmanov et al
	Russia/MUR/CRIE/L191E0135u_1852/2021	EPI_ISL_7717450	2021-11-08	Molecular diagnostic laboratory of Federal Budget Institution of Science "Central Research Institute of Epidemiology" of The Federal Service on Customers' Rights Protection and Human Well/being Surveillance	Group of Genomics and Postgenomic Technologies of Central Research Institute of Epidemiology	Samoilov A.E. et al
	Russia/RYA/CRIE/L189D3915u_4115/2021	EPI_ISL_7717375	2021-11-08	Molecular diagnostic laboratory of Federal Budget Institution of Science "Central Research Institute of Epidemiology" of The Federal Service on Customers' Rights Protection and Human Well/being Surveillance	Group of Genomics and Postgenomic Technologies of Central Research Institute of Epidemiology	Samoilov A.E. et al
	Russia/RYA/CRIE/L219F0047u_7899/2021	EPI_ISL_7717103	2021-11-08	Molecular diagnostic laboratory of Federal Budget Institution of Science "Central Research Institute of Epidemiology" of The Federal Service on Customers' Rights Protection and Human Well/being Surveillance	Group of Genomics and Postgenomic Technologies of Central Research Institute of Epidemiology	Samoilov A.E. et al
	Russia/SPE/CRIE/L189E0224u_7592/2021	EPI_ISL_7717402	2021-11-08	Molecular diagnostic laboratory of Federal Budget Institution of Science "Central Research Institute of Epidemiology" of The Federal Service on Customers' Rights Protection and Human Well/being Surveillance	Group of Genomics and Postgenomic Technologies of Central Research Institute of Epidemiology	Samoilov A.E. et al
	Russia/SPE/RII/2707S/2021	EPI_ISL_7591225	2021-11-08	WHO National Influenza Centre Russian Federation	WHO National Influenza Centre Russian Federation	Andrey Komissarov et al
	Russia/SPE/RII/2714S/2021	EPI_ISL_7591226	2021-11-08	WHO National Influenza Centre Russian Federation	WHO National Influenza Centre Russian Federation	Andrey Komissarov et al
	Russia/SPE/RII/2787S/2021	EPI_ISL_7591227	2021-11-08	WHO National Influenza Centre Russian Federation	WHO National Influenza Centre Russian Federation	Andrey Komissarov et al
	Russia/SPE/RII/2789S/2021	EPI_ISL_7591228	2021-11-08	WHO National Influenza Centre Russian Federation	WHO National Influenza Centre Russian Federation	Andrey Komissarov et al
	Russia/SPE/RII/2797S/2021	EPI_ISL_7591232	2021-11-08	WHO National Influenza Centre Russian Federation	WHO National Influenza Centre Russian Federation	Andrey Komissarov et al
	Russia/TAM/CRIE/L219F0031u_3995/2021	EPI_ISL_7717095	2021-11-08	Molecular diagnostic laboratory of Federal Budget Institution of Science "Central Research Institute of Epidemiology" of The Federal Service on Customers' Rights Protection and Human Well/being Surveillance	Group of Genomics and Postgenomic Technologies of Central Research Institute of Epidemiology	Samoilov A.E. et al
	Russia/TUL/CRIE/L221E0020u_5398/2021	EPI_ISL_7717494	2021-11-08	Molecular diagnostic laboratory of Federal Budget Institution of Science "Central Research Institute of Epidemiology" of The Federal Service on Customers' Rights Protection and Human Well/being Surveillance	Group of Genomics and Postgenomic Technologies of Central Research Institute of Epidemiology	Samoilov A.E. et al
	Russia/TVE/CRIE/L219F0001u_2757/2021	EPI_ISL_7717166	2021-11-08	Molecular diagnostic laboratory of Federal Budget Institution of Science "Central Research Institute of Epidemiology" of The Federal Service on Customers' Rights Protection and Human Well/being Surveillance	Group of Genomics and Postgenomic Technologies of Central Research Institute of Epidemiology	Samoilov A.E. et al
	Russia/VLA/CRIE/L191D1683u_7877/2021	EPI_ISL_7717444	2021-11-08	Molecular diagnostic laboratory of Federal Budget Institution of Science "Central Research Institute of Epidemiology" of The Federal Service on Customers' Rights Protection and Human Well/being Surveillance	Group of Genomics and Postgenomic Technologies of Central Research Institute of Epidemiology	Samoilov A.E. et al
	Russia/YAR/CRIE/L106E0013_9041/2021	EPI_ISL_7717268	2021-11-08	Molecular diagnostic laboratory of Federal Budget Institution of Science "Central Research Institute of Epidemiology" of The Federal Service on Customers' Rights Protection and Human Well/being Surveillance	Group of Genomics and Postgenomic Technologies of Central Research Institute of Epidemiology	Samoilov A.E. et al
	Russia/YAR/CRIE/L106E0014u_8986/2021	EPI_ISL_7717269	2021-11-08	Molecular diagnostic laboratory of Federal Budget Institution of Science "Central Research Institute of Epidemiology" of The Federal Service on Customers' Rights Protection and Human Well/being Surveillance	Group of Genomics and Postgenomic Technologies of Central Research Institute of Epidemiology	Samoilov A.E. et al
	Russia/YAR/CRIE/L106E0025u_9158/2021	EPI_ISL_7717276	2021-11-08	Molecular diagnostic laboratory of Federal Budget Institution of Science "Central Research Institute of Epidemiology" of The Federal Service on Customers' Rights Protection and Human Well/being Surveillance	Group of Genomics and Postgenomic Technologies of Central Research Institute of Epidemiology	Samoilov A.E. et al
	Russia/YAR/CRIE/L106E0040u_8972/2021	EPI_ISL_7717282	2021-11-08	Molecular diagnostic laboratory of Federal Budget Institution of Science "Central Research Institute of Epidemiology" of The Federal Service on Customers' Rights Protection and Human Well/being Surveillance	Group of Genomics and Postgenomic Technologies of Central Research Institute of Epidemiology	Samoilov A.E. et al
	Russia/YAR/CRIE/L191E0039_9014/2021	EPI_ISL_7717646	2021-11-08	Molecular diagnostic laboratory of Federal Budget Institution of Science "Central Research Institute of Epidemiology" of The Federal Service on Customers' Rights Protection and Human Well/being Surveillance	Group of Genomics and Postgenomic Technologies of Central Research Institute of Epidemiology	Samoilov A.E. et al
	Russia/YAR/CRIE/L191E0040u_1993/2021	EPI_ISL_7717647	2021-11-08	Molecular diagnostic laboratory of Federal Budget Institution of Science "Central Research Institute of Epidemiology" of The Federal Service on Customers' Rights Protection and Human Well/being Surveillance	Group of Genomics and Postgenomic Technologies of Central Research Institute of Epidemiology	Samoilov A.E. et al
	Russia/YAR/CRIE/L219F0006u_8994/2021	EPI_ISL_7717080	2021-11-08	Molecular diagnostic laboratory of Federal Budget Institution of Science "Central Research Institute of Epidemiology" of The Federal Service on Customers' Rights Protection and Human Well/being Surveillance	Group of Genomics and Postgenomic Technologies of Central Research Institute of Epidemiology	Samoilov A.E. et al
	Russia/YAR/CRIE/L219F0007u_8431/2021	EPI_ISL_7717081	2021-11-08	Molecular diagnostic laboratory of Federal Budget Institution of Science "Central Research Institute of Epidemiology" of The Federal Service on Customers' Rights Protection and Human Well/being Surveillance	Group of Genomics and Postgenomic Technologies of Central Research Institute of Epidemiology	Samoilov A.E. et al
	Russia/YAR/CRIE/L219F0010u_8477/2021	EPI_ISL_7717082	2021-11-08	Molecular diagnostic laboratory of Federal Budget Institution of Science "Central Research Institute of Epidemiology" of The Federal Service on Customers' Rights Protection and Human Well/being Surveillance	Group of Genomics and Postgenomic Technologies of Central Research Institute of Epidemiology	Samoilov A.E. et al
	Russia/YAR/CRIE/L219F0011u_8676/2021	EPI_ISL_7717083	2021-11-08	Molecular diagnostic laboratory of Federal Budget Institution of Science "Central Research Institute of Epidemiology" of The Federal Service on Customers' Rights Protection and Human Well/being Surveillance	Group of Genomics and Postgenomic Technologies of Central Research Institute of Epidemiology	Samoilov A.E. et al
	Russia/AST/RII/MH38959S/2021	EPI_ISL_6831971	2021-11-09	Aleksandro/Mariinsky Regional Clinical Hospital	WHO National Influenza Centre Russian Federation	Andrey Komissarov et al
	Russia/AST/RII/MH38960S/2021	EPI_ISL_6831972	2021-11-09	Aleksandro/Mariinsky Regional Clinical Hospital	WHO National Influenza Centre Russian Federation	Andrey Komissarov et al
	Russia/AST/RII/MH38961S/2021	EPI_ISL_6831973	2021-11-09	Aleksandro/Mariinsky Regional Clinical Hospital	WHO National Influenza Centre Russian Federation	Andrey Komissarov et al
	Russia/AST/RII/MH38962S/2021	EPI_ISL_6831974	2021-11-09	Aleksandro/Mariinsky Regional Clinical Hospital	WHO National Influenza Centre Russian Federation	Andrey Komissarov et al
	Russia/AST/RII/MH38963S/2021	EPI_ISL_6831975	2021-11-09	Aleksandro/Mariinsky Regional Clinical Hospital	WHO National Influenza Centre Russian Federation	Andrey Komissarov et al
	Russia/AST/RII/MH38964S/2021	EPI_ISL_6831976	2021-11-09	Aleksandro/Mariinsky Regional Clinical Hospital	WHO National Influenza Centre Russian Federation	Andrey Komissarov et al
	Russia/AST/RII/MH38965S/2021	EPI_ISL_6831977	2021-11-09	Aleksandro/Mariinsky Regional Clinical Hospital	WHO National Influenza Centre Russian Federation	Andrey Komissarov et al
	Russia/AST/RII/MH38968S/2021	EPI_ISL_6831978	2021-11-09	Aleksandro/Mariinsky Regional Clinical Hospital	WHO National Influenza Centre Russian Federation	Andrey Komissarov et al
	Russia/AST/RII/MH38972S/2021	EPI_ISL_6831979	2021-11-09	Aleksandro/Mariinsky Regional Clinical Hospital	WHO National Influenza Centre Russian Federation	Andrey Komissarov et al
	Russia/KDA/CRIE/L189E2307u_1671/2021	EPI_ISL_7717405	2021-11-09	Molecular diagnostic laboratory of Federal Budget Institution of Science "Central Research Institute of Epidemiology" of The Federal Service on Customers' Rights Protection and Human Well/being Surveillance	Group of Genomics and Postgenomic Technologies of Central Research Institute of Epidemiology	Samoilov A.E. et al
	Russia/KOS/CRIE/L219F0016u_7975/2021	EPI_ISL_7717085	2021-11-09	Molecular diagnostic laboratory of Federal Budget Institution of Science "Central Research Institute of Epidemiology" of The Federal Service on Customers' Rights Protection and Human Well/being Surveillance	Group of Genomics and Postgenomic Technologies of Central Research Institute of Epidemiology	Samoilov A.E. et al
	Russia/KOS/CRIE/L219F0017u_8076/2021	EPI_ISL_8530615	2021-11-09	Molecular diagnostic laboratory of Federal Budget Institution of Science "Central Research Institute of Epidemiology" of The Federal Service on Customers' Rights Protection and Human Well/being Surveillance	Group of Genomics and Postgenomic Technologies of Central Research Institute of Epidemiology	Samoilov A.E. et al
	Russia/KOS/CRIE/L219F0021u_7655/2021	EPI_ISL_7717086	2021-11-09	Molecular diagnostic laboratory of Federal Budget Institution of Science "Central Research Institute of Epidemiology" of The Federal Service on Customers' Rights Protection and Human Well/being Surveillance	Group of Genomics and Postgenomic Technologies of Central Research Institute of Epidemiology	Samoilov A.E. et al
	Russia/KOS/CRIE/L219F0023u_7877/2021	EPI_ISL_7717087	2021-11-09	Molecular diagnostic laboratory of Federal Budget Institution of Science "Central Research Institute of Epidemiology" of The Federal Service on Customers' Rights Protection and Human Well/being Surveillance	Group of Genomics and Postgenomic Technologies of Central Research Institute of Epidemiology	Samoilov A.E. et al
	Russia/KOS/CRIE/L219F0025u_7798/2021	EPI_ISL_7717089	2021-11-09	Molecular diagnostic laboratory of Federal Budget Institution of Science "Central Research Institute of Epidemiology" of The Federal Service on Customers' Rights Protection and Human Well/being Surveillance	Group of Genomics and Postgenomic Technologies of Central Research Institute of Epidemiology	Samoilov A.E. et al
	Russia/MAG/CRIE/L219L0033u_6438/2021	EPI_ISL_7688558	2021-11-09	Molecular diagnostic laboratory of Federal Budget Institution of Science "Central Research Institute of Epidemiology" of The Federal Service on Customers' Rights Protection and Human Well/being Surveillance	Group of Genomics and Postgenomic Technologies of Central Research Institute of Epidemiology	Samoilov A.E. et al
	Russia/MAG/CRIE/L219L0036u_6377/2021	EPI_ISL_7688561	2021-11-09	Molecular diagnostic laboratory of Federal Budget Institution of Science "Central Research Institute of Epidemiology" of The Federal Service on Customers' Rights Protection and Human Well/being Surveillance	Group of Genomics and Postgenomic Technologies of Central Research Institute of Epidemiology	Samoilov A.E. et al
	Russia/MAG/CRIE/L219L0042u_6354/2021	EPI_ISL_7688566	2021-11-09	Molecular diagnostic laboratory of Federal Budget Institution of Science "Central Research Institute of Epidemiology" of The Federal Service on Customers' Rights Protection and Human Well/being Surveillance	Group of Genomics and Postgenomic Technologies of Central Research Institute of Epidemiology	Samoilov A.E. et al
	Russia/MAG/CRIE/L219L0043u_6536/2021	EPI_ISL_7688567	2021-11-09	Molecular diagnostic laboratory of Federal Budget Institution of Science "Central Research Institute of Epidemiology" of The Federal Service on Customers' Rights Protection and Human Well/being Surveillance	Group of Genomics and Postgenomic Technologies of Central Research Institute of Epidemiology	Samoilov A.E. et al
	Russia/MAG/CRIE/L219L0044u_6279/2021	EPI_ISL_7688568	2021-11-09	Molecular diagnostic laboratory of Federal Budget Institution of Science "Central Research Institute of Epidemiology" of The Federal Service on Customers' Rights Protection and Human Well/being Surveillance	Group of Genomics and Postgenomic Technologies of Central Research Institute of Epidemiology	Samoilov A.E. et al
	Russia/MAG/CRIE/L219L0045u_6455/2021	EPI_ISL_7688569	2021-11-09	Molecular diagnostic laboratory of Federal Budget Institution of Science "Central Research Institute of Epidemiology" of The Federal Service on Customers' Rights Protection and Human Well/being Surveillance	Group of Genomics and Postgenomic Technologies of Central Research Institute of Epidemiology	Samoilov A.E. et al
	Russia/MAG/CRIE/L219L0047u_6312/2021	EPI_ISL_7688571	2021-11-09	Molecular diagnostic laboratory of Federal Budget Institution of Science "Central Research Institute of Epidemiology" of The Federal Service on Customers' Rights Protection and Human Well/being Surveillance	Group of Genomics and Postgenomic Technologies of Central Research Institute of Epidemiology	Samoilov A.E. et al
	Russia/MOS/CRIE/L106E0088u_3750/2021	EPI_ISL_7717301	2021-11-09	Molecular diagnostic laboratory of Federal Budget Institution of Science "Central Research Institute of Epidemiology" of The Federal Service on Customers' Rights Protection and Human Well/being Surveillance	Group of Genomics and Postgenomic Technologies of Central Research Institute of Epidemiology	Samoilov A.E. et al
	Russia/MOS/CRIE/L106E0094u_1350/2021	EPI_ISL_7717308	2021-11-09	Molecular diagnostic laboratory of Federal Budget Institution of Science "Central Research Institute of Epidemiology" of The Federal Service on Customers' Rights Protection and Human Well/being Surveillance	Group of Genomics and Postgenomic Technologies of Central Research Institute of Epidemiology	Samoilov A.E. et al
	Russia/MOS/CRIE/L106E0403u_9296/2021	EPI_ISL_7717281	2021-11-09	Molecular diagnostic laboratory of Federal Budget Institution of Science "Central Research Institute of Epidemiology" of The Federal Service on Customers' Rights Protection and Human Well/being Surveillance	Group of Genomics and Postgenomic Technologies of Central Research Institute of Epidemiology	Samoilov A.E. et al
	Russia/MOS/CRIE/L106E0427u_8794/2021	EPI_ISL_7717283	2021-11-09	Molecular diagnostic laboratory of Federal Budget Institution of Science "Central Research Institute of Epidemiology" of The Federal Service on Customers' Rights Protection and Human Well/being Surveillance	Group of Genomics and Postgenomic Technologies of Central Research Institute of Epidemiology	Samoilov A.E. et al
	Russia/MOS/CRIE/L106E0449u_4085/2021	EPI_ISL_8530625	2021-11-09	Molecular diagnostic laboratory of Federal Budget Institution of Science "Central Research Institute of Epidemiology" of The Federal Service on Customers' Rights Protection and Human Well/being Surveillance	Group of Genomics and Postgenomic Technologies of Central Research Institute of Epidemiology	Samoilov A.E. et al
	Russia/MOS/CRIE/L106E0500_3710/2021	EPI_ISL_7717285	2021-11-09	Molecular diagnostic laboratory of Federal Budget Institution of Science "Central Research Institute of Epidemiology" of The Federal Service on Customers' Rights Protection and Human Well/being Surveillance	Group of Genomics and Postgenomic Technologies of Central Research Institute of Epidemiology	Samoilov A.E. et al
	Russia/MOS/CRIE/L106E0502u_5736/2021	EPI_ISL_7717286	2021-11-09	Molecular diagnostic laboratory of Federal Budget Institution of Science "Central Research Institute of Epidemiology" of The Federal Service on Customers' Rights Protection and Human Well/being Surveillance	Group of Genomics and Postgenomic Technologies of Central Research Institute of Epidemiology	Samoilov A.E. et al
	Russia/MOS/CRIE/L106E0573u_0418/2021	EPI_ISL_7717287	2021-11-09	Molecular diagnostic laboratory of Federal Budget Institution of Science "Central Research Institute of Epidemiology" of The Federal Service on Customers' Rights Protection and Human Well/being Surveillance	Group of Genomics and Postgenomic Technologies of Central Research Institute of Epidemiology	Samoilov A.E. et al
	Russia/MOS/CRIE/L106E0579_3601/2021	EPI_ISL_7717288	2021-11-09	Molecular diagnostic laboratory of Federal Budget Institution of Science "Central Research Institute of Epidemiology" of The Federal Service on Customers' Rights Protection and Human Well/being Surveillance	Group of Genomics and Postgenomic Technologies of Central Research Institute of Epidemiology	Samoilov A.E. et al
	Russia/MOS/CRIE/L106E0580u_9090/2021	EPI_ISL_7717289	2021-11-09	Molecular diagnostic laboratory of Federal Budget Institution of Science "Central Research Institute of Epidemiology" of The Federal Service on Customers' Rights Protection and Human Well/being Surveillance	Group of Genomics and Postgenomic Technologies of Central Research Institute of Epidemiology	Samoilov A.E. et al
	Russia/MOS/CRIE/L106E0582_0331/2021	EPI_ISL_7717290	2021-11-09	Molecular diagnostic laboratory of Federal Budget Institution of Science "Central Research Institute of Epidemiology" of The Federal Service on Customers' Rights Protection and Human Well/being Surveillance	Group of Genomics and Postgenomic Technologies of Central Research Institute of Epidemiology	Samoilov A.E. et al
	Russia/MOS/CRIE/L106E0591u_9261/2021	EPI_ISL_7717291	2021-11-09	Molecular diagnostic laboratory of Federal Budget Institution of Science "Central Research Institute of Epidemiology" of The Federal Service on Customers' Rights Protection and Human Well/being Surveillance	Group of Genomics and Postgenomic Technologies of Central Research Institute of Epidemiology	Samoilov A.E. et al
	Russia/SPE/RII/7041S/2021	EPI_ISL_8379872	2021-12-22	WHO National Influenza Centre Russian Federation	WHO National Influenza Centre Russian Federation	Andrey Komissarov et al
	Russia/SPE/RII/7048S/2021	EPI_ISL_8379873	2021-12-22	WHO National Influenza Centre Russian Federation	WHO National Influenza Centre Russian Federation	Andrey Komissarov et al
	Russia/SPE/RII/7059S/2021	EPI_ISL_8379874	2021-12-22	WHO National Influenza Centre Russian Federation	WHO National Influenza Centre Russian Federation	Andrey Komissarov et al
	Russia/SPE/RII/7060S/2021	EPI_ISL_8379875	2021-12-22	WHO National Influenza Centre Russian Federation	WHO National Influenza Centre Russian Federation	Andrey Komissarov et al
	Russia/SPE/RII/7070S/2021	EPI_ISL_8379876	2021-12-22	WHO National Influenza Centre Russian Federation	WHO National Influenza Centre Russian Federation	Andrey Komissarov et al
	Russia/SPE/RII/7076S/2021	EPI_ISL_8379877	2021-12-22	WHO National Influenza Centre Russian Federation	WHO National Influenza Centre Russian Federation	Andrey Komissarov et al
	Russia/SPE/RII/7101S/2021	EPI_ISL_8379878	2021-12-22	WHO National Influenza Centre Russian Federation	WHO National Influenza Centre Russian Federation	Andrey Komissarov et al
	Russia/SPE/RII/MH46495S/2021	EPI_ISL_8109581	2021-12-19	City Hospital No 40	WHO National Influenza Centre Russian Federation	Andrey Komissarov et al
	Russia/SPE/RII/7116S/2021	EPI_ISL_8379879	2021-12-22	WHO National Influenza Centre Russian Federation	WHO National Influenza Centre Russian Federation	Andrey Komissarov et al
	Russia/SPE/RII/7125S/2021	EPI_ISL_8379880	2021-12-22	WHO National Influenza Centre Russian Federation	WHO National Influenza Centre Russian Federation	Andrey Komissarov et al
	Russia/SPE/RII/7127S/2021	EPI_ISL_8379881	2021-12-22	WHO National Influenza Centre Russian Federation	WHO National Influenza Centre Russian Federation	Andrey Komissarov et al
	Russia/SPE/RII/7131S/2021	EPI_ISL_8379882	2021-12-22	WHO National Influenza Centre Russian Federation	WHO National Influenza Centre Russian Federation	Andrey Komissarov et al
	Russia/SPE/RII/7141S/2021	EPI_ISL_8379883	2021-12-22	WHO National Influenza Centre Russian Federation	WHO National Influenza Centre Russian Federation	Andrey Komissarov et al
	Russia/SPE/RII/7142S/2021	EPI_ISL_8379884	2021-12-22	WHO National Influenza Centre Russian Federation	WHO National Influenza Centre Russian Federation	Andrey Komissarov et al
	Russia/SPE/RII/7152S/2021	EPI_ISL_8379885	2021-12-22	WHO National Influenza Centre Russian Federation	WHO National Influenza Centre Russian Federation	Andrey Komissarov et al
	Russia/SPE/RII/MH46951S/2021	EPI_ISL_8379932	2021-12-22	HELIX LLC	WHO National Influenza Centre Russian Federation	Andrey Komissarov et al
	Russia/SPE/RII/MH46964S/2021	EPI_ISL_8379933	2021-12-22	HELIX LLC	WHO National Influenza Centre Russian Federation	Andrey Komissarov et al
	Russia/SPE/RII/MH47042S/2021	EPI_ISL_8379934	2021-12-22	HELIX LLC	WHO National Influenza Centre Russian Federation	Andrey Komissarov et al
	Russia/SPE/RII/MH47123S/2021	EPI_ISL_8379935	2021-12-22	HELIX LLC	WHO National Influenza Centre Russian Federation	Andrey Komissarov et al
	Russia/SPE/RII/MH47573S/2021	EPI_ISL_8379949	2021-12-22	City Hospital No 40	WHO National Influenza Centre Russian Federation	Andrey Komissarov et al
	Russia/SPE/RII/MH47576S/2021	EPI_ISL_8379950	2021-12-22	City Hospital No 40	WHO National Influenza Centre Russian Federation	Andrey Komissarov et al
	Russia/SPE/RII/MH47274S/2021	EPI_ISL_8379936	2021-12-23	Pavlov First Saint Petersburg State Medical University	WHO National Influenza Centre Russian Federation	Andrey Komissarov et al
	Russia/SPE/RII/MH47276S/2021	EPI_ISL_8379937	2021-12-23	Pavlov First Saint Petersburg State Medical University	WHO National Influenza Centre Russian Federation	Andrey Komissarov et al
	Russia/SPE/RII/MH47338S/2021	EPI_ISL_8379938	2021-12-23	HELIX LLC	WHO National Influenza Centre Russian Federation	Andrey Komissarov et al
	Russia/SPE/RII/MH47346S/2021	EPI_ISL_8379939	2021-12-23	HELIX LLC	WHO National Influenza Centre Russian Federation	Andrey Komissarov et al
	Russia/SPE/RII/MH47359S/2021	EPI_ISL_8379940	2021-12-23	HELIX LLC	WHO National Influenza Centre Russian Federation	Andrey Komissarov et al
	Russia/SPE/RII/MH47582S/2021	EPI_ISL_8379951	2021-12-23	City Hospital No 40	WHO National Influenza Centre Russian Federation	Andrey Komissarov et al
	Russia/SPE/RII/MH47583S/2021	EPI_ISL_8379952	2021-12-23	City Hospital No 40	WHO National Influenza Centre Russian Federation	Andrey Komissarov et al
	Russia/SPE/RII/MH47584S/2021	EPI_ISL_8379953	2021-12-23	City Hospital No 40	WHO National Influenza Centre Russian Federation	Andrey Komissarov et al
	Russia/SPE/RII/7378S/2021	EPI_ISL_8379887	2021-12-24	WHO National Influenza Centre Russian Federation	WHO National Influenza Centre Russian Federation	Andrey Komissarov et al
	Russia/SPE/RII/7379S/2021	EPI_ISL_8379888	2021-12-24	WHO National Influenza Centre Russian Federation	WHO National Influenza Centre Russian Federation	Andrey Komissarov et al
	Russia/SPE/RII/7384S/2021	EPI_ISL_8379889	2021-12-24	WHO National Influenza Centre Russian Federation	WHO National Influenza Centre Russian Federation	Andrey Komissarov et al
	Russia/SPE/RII/7412S/2021	EPI_ISL_8379890	2021-12-24	WHO National Influenza Centre Russian Federation	WHO National Influenza Centre Russian Federation	Andrey Komissarov et al
	Russia/SPE/RII/7413S/2021	EPI_ISL_8379891	2021-12-24	WHO National Influenza Centre Russian Federation	WHO National Influenza Centre Russian Federation	Andrey Komissarov et al
	Russia/SPE/RII/7483S/2021	EPI_ISL_8379892	2021-12-24	WHO National Influenza Centre Russian Federation	WHO National Influenza Centre Russian Federation	Andrey Komissarov et al
	Russia/SPE/RII/7491S/2021	EPI_ISL_8379893	2021-12-24	WHO National Influenza Centre Russian Federation	WHO National Influenza Centre Russian Federation	Andrey Komissarov et al
	Russia/SPE/RII/7504S/2021	EPI_ISL_8379894	2021-12-24	WHO National Influenza Centre Russian Federation	WHO National Influenza Centre Russian Federation	Andrey Komissarov et al
	Russia/SPE/RII/7508S/2021	EPI_ISL_8379897	2021-12-24	WHO National Influenza Centre Russian Federation	WHO National Influenza Centre Russian Federation	Andrey Komissarov et al
	Russia/SPE/RII/7509S/2021	EPI_ISL_8379898	2021-12-24	WHO National Influenza Centre Russian Federation	WHO National Influenza Centre Russian Federation	Andrey Komissarov et al
	Russia/SPE/RII/7539S/2021	EPI_ISL_8379899	2021-12-24	WHO National Influenza Centre Russian Federation	WHO National Influenza Centre Russian Federation	Andrey Komissarov et al
	Russia/SPE/RII/7546S/2021	EPI_ISL_8379900	2021-12-24	WHO National Influenza Centre Russian Federation	WHO National Influenza Centre Russian Federation	Andrey Komissarov et al
	Russia/SPE/RII/7547S/2021	EPI_ISL_8379901	2021-12-24	WHO National Influenza Centre Russian Federation	WHO National Influenza Centre Russian Federation	Andrey Komissarov et al
	Russia/SPE/RII/MH48512S/2021	EPI_ISL_8783277	2021-12-27	WHO National Influenza Centre Russian Federation	WHO National Influenza Centre Russian Federation	Andrey Komissarov et al
	Russia/PSK/RII/MH48574S/2021	EPI_ISL_8783287	2021-12-29	HELIX LLC	WHO National Influenza Centre Russian Federation	Andrey Komissarov et al
	Russia/SPE/RII/MH48528S/2021	EPI_ISL_8783278	2021-12-29	HELIX LLC	WHO National Influenza Centre Russian Federation	Andrey Komissarov et al
	Russia/SPE/RII/MH48532S/2021	EPI_ISL_8783279	2021-12-29	HELIX LLC	WHO National Influenza Centre Russian Federation	Andrey Komissarov et al
	Russia/SPE/RII/MH48533S/2021	EPI_ISL_8783280	2021-12-29	HELIX LLC	WHO National Influenza Centre Russian Federation	Andrey Komissarov et al
	Russia/SPE/RII/MH48537S/2021	EPI_ISL_8783281	2021-12-29	HELIX LLC	WHO National Influenza Centre Russian Federation	Andrey Komissarov et al
	Russia/SPE/RII/MH48547S/2021	EPI_ISL_8783282	2021-12-29	HELIX LLC	WHO National Influenza Centre Russian Federation	Andrey Komissarov et al
	Russia/SPE/RII/MH48548S/2021	EPI_ISL_8783283	2021-12-29	HELIX LLC	WHO National Influenza Centre Russian Federation	Andrey Komissarov et al
	Russia/SPE/RII/MH48549S/2021	EPI_ISL_8783284	2021-12-29	HELIX LLC	WHO National Influenza Centre Russian Federation	Andrey Komissarov et al
	Russia/SPE/RII/MH48553S/2021	EPI_ISL_8783285	2021-12-29	HELIX LLC	WHO National Influenza Centre Russian Federation	Andrey Komissarov et al
	Russia/SPE/RII/MH48571S/2021	EPI_ISL_8783286	2021-12-29	HELIX LLC	WHO National Influenza Centre Russian Federation	Andrey Komissarov et al
	Russia/SPE/RII/MH48579S/2021	EPI_ISL_8783288	2021-12-29	HELIX LLC	WHO National Influenza Centre Russian Federation	Andrey Komissarov et al
	Russia/SPE/RII/MH48591S/2021	EPI_ISL_8783289	2021-12-29	HELIX LLC	WHO National Influenza Centre Russian Federation	Andrey Komissarov et al
	Russia/SPE/RII/MH48601S/2021	EPI_ISL_8783290	2021-12-29	HELIX LLC	WHO National Influenza Centre Russian Federation	Andrey Komissarov et al
	Russia/SPE/RII/MH48610S/2021	EPI_ISL_8783291	2021-12-29	HELIX LLC	WHO National Influenza Centre Russian Federation	Andrey Komissarov et al
	Russia/SPE/RII/MH48650S/2021	EPI_ISL_8783292	2021-12-29	HELIX LLC	WHO National Influenza Centre Russian Federation	Andrey Komissarov et al
	Russia/SPE/RII/MH48654S/2021	EPI_ISL_8783293	2021-12-29	HELIX LLC	WHO National Influenza Centre Russian Federation	Andrey Komissarov et al
	Russia/SPE/RII/MH48676S/2021	EPI_ISL_8783294	2021-12-29	HELIX LLC	WHO National Influenza Centre Russian Federation	Andrey Komissarov et al
	Russia/SPE/RII/MH48677S/2021	EPI_ISL_8783295	2021-12-29	HELIX LLC	WHO National Influenza Centre Russian Federation	Andrey Komissarov et al
	Russia/SPE/RII/MH48679S/2021	EPI_ISL_8783296	2021-12-29	HELIX LLC	WHO National Influenza Centre Russian Federation	Andrey Komissarov et al
	Russia/SPE/RII/MH48701S/2021	EPI_ISL_8783297	2021-12-29	HELIX LLC	WHO National Influenza Centre Russian Federation	Andrey Komissarov et al
	Russia/SPE/RII/MH48758S/2021	EPI_ISL_8783317	2021-12-29	City Hospital No 40	WHO National Influenza Centre Russian Federation	Andrey Komissarov et al
	Russia/SPE/RII/MH48760S/2021	EPI_ISL_8783318	2021-12-29	City Hospital No 40	WHO National Influenza Centre Russian Federation	Andrey Komissarov et al
	Russia/SPE/RII/MH48761S/2021	EPI_ISL_8783319	2021-12-29	City Hospital No 40	WHO National Influenza Centre Russian Federation	Andrey Komissarov et al
	Russia/SPE/RII/MH48767S/2021	EPI_ISL_8783320	2021-12-29	City Hospital No 40	WHO National Influenza Centre Russian Federation	Andrey Komissarov et al
	Russia/SPE/RII/MH48769S/2021	EPI_ISL_8783321	2021-12-29	City Hospital No 40	WHO National Influenza Centre Russian Federation	Andrey Komissarov et al
	Russia/SPE/RII/MH48770S/2021	EPI_ISL_8783322	2021-12-29	City Hospital No 40	WHO National Influenza Centre Russian Federation	Andrey Komissarov et al
	Russia/SPE/RII/MH48772S/2021	EPI_ISL_8783323	2021-12-29	City Hospital No 40	WHO National Influenza Centre Russian Federation	Andrey Komissarov et al
	Russia/BA/RII/MH50579S/2022	EPI_ISL_9141910	2022-01-04	Bashkortostan Republican Clinical Hospital No 2	WHO National Influenza Centre Russian Federation	Andrey Komissarov et al
	Russia/SPE/RII/9027S/2022	EPI_ISL_9141850	2022-01-07	WHO National Influenza Centre Russian Federation	WHO National Influenza Centre Russian Federation	Andrey Komissarov et al
	Russia/SPE/RII/9028S/2022	EPI_ISL_9141853	2022-01-07	WHO National Influenza Centre Russian Federation	WHO National Influenza Centre Russian Federation	Andrey Komissarov et al
	Russia/BA/RII/MH50581S/2022	EPI_ISL_9141912	2022-01-08	Bashkortostan Republican Clinical Hospital No 2	WHO National Influenza Centre Russian Federation	Andrey Komissarov et al
	Russia/BA/RII/MH50582S/2022	EPI_ISL_9141914	2022-01-10	Bashkortostan Republican Clinical Hospital No 2	WHO National Influenza Centre Russian Federation	Andrey Komissarov et al
	Russia/BA/RII/MH50584S/2022	EPI_ISL_9141919	2022-01-10	Bashkortostan Republican Clinical Hospital No 2	WHO National Influenza Centre Russian Federation	Andrey Komissarov et al
[truncated: 1,833 more rows]
